# Supplementary material
Source: PubMed Central journal article supplement (PMC3242065)
Supplement: NIHMS37096-supplement-1.pdf [file NIHMS37096-supplement-1.pdf]

## Dense genotyping identifies and localizes multiple common and rare variant association signals in celiac disease.

Gosia Trynka<sup>1,35</sup>, Karen A Hunt<sup>2,35</sup>, Nicholas A Bockett<sup>2</sup>, Jihane Romanos<sup>1</sup>, Vanisha Mistry<sup>2</sup>, Agata Szperl<sup>1</sup>, Sjoerd F Bakker<sup>3</sup>, Maria Teresa Bardella<sup>4,5</sup>, Leena Bhaw-Rosun<sup>6</sup>, Gemma Castillejo<sup>7</sup>, Emilio G. de la Concha<sup>8</sup>, Rodrigo Coutinho de Almeida<sup>1</sup>, Kerith-Rae M Dias<sup>6</sup>, Cleo C. van Diemen<sup>1</sup>, Patrick CA Dubois<sup>2</sup>, Richard H. Duerr<sup>9,10</sup>, Sarah Edkins<sup>11</sup>, Lude Franke<sup>1</sup>, Karin Fransen<sup>1,12</sup>, Javier Gutierrez<sup>1</sup>, Graham AR Heap<sup>2</sup>, Barbara Hrdlickova<sup>1</sup>, Sarah Hunt<sup>11</sup>, Leticia Plaza Izurieta<sup>13</sup>, Valentina Izzo<sup>14</sup>, Leo AB Joosten<sup>15,16</sup>, Cordelia Langford<sup>11</sup>, Maria Cristina Mazzilli<sup>17</sup>, Charles A Mein<sup>6</sup>, Vandana Midah<sup>18</sup>, Mitja Mitrovic<sup>1,19</sup>, Barbara Mora<sup>17</sup>, Marinita Morelli<sup>14</sup>, Sarah Nutland<sup>20</sup>, Concepción Núñez<sup>8</sup>, Suna Onengut-Gumuscu<sup>21</sup>, Kerra Pearce<sup>22</sup>, Mathieu Platteel<sup>1</sup>, Isabel Polanco<sup>23</sup>, Simon Potter<sup>11</sup>, Carmen Ribes-Koninckx<sup>24</sup>, Isis Ricaño-Ponce<sup>1</sup>, Stephen S. Rich<sup>21</sup>, Anna Rybak<sup>25</sup>, José Luis Santiago<sup>8</sup>, Sabyasachi Senapati<sup>26</sup>, Ajit Sood<sup>18</sup>, Hania Szajewska<sup>27</sup>, Riccardo Troncone<sup>28</sup>, Jezabel Varadé<sup>8</sup>, Chris Wallace<sup>20</sup>, Victorien M Wolters<sup>29</sup>, Alexandra Zhernakova<sup>30</sup>, CEGEC (Spanish Consortium on the Genetics of Coeliac Disease), PreventCD Study Group, Wellcome Trust Case Control Consortium, B.K. Thelma<sup>26</sup>, Bozena Cukrowska<sup>31</sup>, Elena Urcelay<sup>8</sup>, Jose Ramon Bilbao<sup>13</sup>, M Luisa Mearin<sup>32</sup>, Donatella Barisani<sup>33</sup>, Jeffrey C Barrett<sup>11</sup>, Vincent Plagnol<sup>34</sup>, Panos Deloukas<sup>11</sup>, Cisca Wijmenga<sup>1,36</sup>, David A van Heel<sup>2,36</sup>

### Supplementary Note

#### **a) Consortium and Group Memberships**

*CEGEC (Spanish Consortium for Genetics of Coeliac Disease - Spanish Celiac Disease Society (SEEC))*

Montserrat Alsina<sup>1</sup>, Maria Esteve Comas<sup>1</sup>, Laura Pardo Grau<sup>1</sup>, Luis Castaño<sup>2</sup>, Pablo Oliver<sup>2</sup>, Juan Carlos Vitoria<sup>2</sup>, Luis Rodrigo<sup>3</sup>, Carlos López-Larrea<sup>3</sup>, Antonio López-Vázquez<sup>3</sup>, Idoia Hualde<sup>4</sup>, Zuriñe García<sup>4</sup>, Blanca Hernández Charro<sup>5</sup>, Maria Antonia Ramos-Arroyo<sup>5</sup>, Félix Sánchez-Valverde<sup>5</sup>, Carme Farré<sup>6</sup>, Teresa Marqués<sup>6</sup>, Pere Vilar<sup>6</sup>, Eduardo Arranz<sup>7</sup>, José Antonio Garrote<sup>7</sup>

<sup>1</sup>CATLAB- Hospital Universitari Mutua Terrassa, Barcelona, Catalonia, Spain

<sup>2</sup>Hospital Universitario de Cruces, Barakaldo, Basque Country, Spain

<sup>3</sup>Hospital Universitario Central Asturias, Oviedo, Spain

<sup>4</sup>Hospital de Txagorritxu, Vitoria-Gasteiz, Basque Country, Spain

<sup>5</sup>Hospital Virgen del Camino, Pamplona-Iruña, Spain

<sup>6</sup>Hospital Sant Joan de Déu, Barcelona, Catalonia, Spain

<sup>7</sup>IBGM-Universidad de Valladolid, Valladolid, Spain

*PreventCD Study Group*

Renata Auricchio<sup>1</sup>, Caroline E Hogen Esch<sup>2</sup>, Ania Chmielewska<sup>3</sup>, Gosia Piescik<sup>3</sup>, Eva Martinez<sup>4</sup>, Vicente Varea<sup>5</sup>, Francesc Martinez Cerezo<sup>6</sup>, Ester Donat-Aliaga<sup>7</sup>, Joaquin Escribano<sup>6</sup>

Department of Paediatrics and European Laboratory for the Investigation of Food-Induced Diseases, University “Federico II”, Naples, Italy.

<sup>2</sup>Department of Paediatric Gastroenterology, Leiden University Medical Center, Leiden, the Netherlands.

<sup>3</sup>Department of Paediatrics, The Medical University of Warsaw, Warsaw, Poland

<sup>4</sup>Pediatric Gastroenterology Department, Hospital La Paz, Madrid, Spain.

<sup>5</sup>Hospital Sant Joan de Déu, Barcelona, Spain.

<sup>6</sup>Hospital Universitari Sant Joan de Reus, Spain.

<sup>7</sup>La Fe University Hospital, Pediatric Gastroenterology, Bulevar Sus 46026 Valencia, Spain.

*WTCCC (Wellcome Trust Case Control Consortium)*

Please see the website [www.wtccc.org.uk](http://www.wtccc.org.uk) for further details.

#### **b) Ethics Committee / Institutional Review Board Approvals**

UK: Oxford REC B, East London and The City REC 1, SouthEast Multi-Centre Research Ethics Committee.

The Netherlands: Medical Ethical Committee of the University Medical Center Utrecht, Medical Ethical Committee of the Free University Medical Center Amsterdam.

Poland: Bioethical Committee of the Children's Memorial Health Institute, Warsaw.

Spain - CEGEC: Clinical Trials and Ethics Committee of Hospital de Cruces

Spain - Madrid: CEIC- Comité ético de investigación clínica del Hospital Clínico San Carlos.

Italy - Rome, Ethics Committee of Policlinico Umberto I, “La Sapienza” University of Rome

Italy - Naples: Ethical Committee of the Faculty of Medicine of the University of Naples Federico II.

Italy - Milan: Ethical Committee Fondazione IRCCS Ca' Granda – Ospedale Maggiore Policlinico.

India - Punjab: Drug trial ethics committee, Dayanand Medical College and Hospital, Ludhiana, Punjab.

### **c) Summary of additional case/control resequencing content on ImmunoChip**

We provide a brief summary of regional resequencing data on ImmunoChip. This is content that was submitted in addition to the 1000Genomes Pilot CEU based fine mapping data for the 183 non-HLA autoimmune loci. All coordinates are hg18/NCBI build 36.

#### **Summary of celiac disease case resequencing.**

80 random celiac case DNA samples were selected for 10 blind DNA pools of 8 samples each. A total of 1.26Mb of genomic sequence was selected for a capture array. Genomic regions were selected from previous celiac disease GWAS:

|                 |                          |
|-----------------|--------------------------|
| <i>IL2/IL21</i> | chr4:123080000-123820000 |
| <i>IL12A</i>    | chr3:161090000-161300000 |
| <i>RGS1</i>     | chr1:190530000-190850000 |

Repetitive sequence prevented capture of 245kb (20%) of sequence, which was not tiled on the capture array. We noted that nearly all known high-quality SNPs (96%, 1512 of 1575 CEU HapMap SNPs) fell within the 1015kb non-repetitive regions (“the PCR accessible genome”).

Each pool was hybridised to a Nimblegen 385k capture array, using 60-100bp probes. Sequencing was performed using 45bp paired end reads on an Illumina GAI sequencer. Alignment was performed using Novoalign, allowing gapped reads. SNP calling was performed in the pools at bases with read-depth>150X (~20X per sample in the pool) to maintain accuracy. On average, 84% of tiled bases had sufficient read-depth in a pool (and 85% of HapMap SNP positions). We calculated approximately 5% false positive and false negative variant discovery rates using Hap300 genotype data (all samples were array genotyped) and Hap300 SNPs mapping to the capture regions. Validation of 43 of 46 randomly selected SNPs by Sanger sequencing estimated a 6.5% false positive rate.

3457 SNPs and 616 small indels were called and all were submitted to both dbSNP (dbSNP Submitter Handle VANHEEL\_LAB\_LONDON) and for ImmunoChip design.

#### **Summary of WTCCC resequencing.**

40 cases (for each disease) and 40 controls were sequenced per genomic region in blind pools of 8 samples. The samples sequenced differed between regions and were chosen to ensure representation of both the known disease risk allele(s) (in case samples) and protective allele(s) (in control samples) as well as the known haplotypic diversity in each region (derived from HapMap2). Genomic regions were selected from the relevant disease GWAS studies.

PCR primers were designed in a triple tile across the targeted region and used to amplify long-range PCR products of between 5 and 10 kb. PCR products were pooled, and sequenced using 37bp paired end reads on an Illumina GAI or GAI sequencer. Alignment was performed using MAQ. Potential SNPs are filtered according to read depth, base quality, the nearness of neighbouring SNPs and het ratio where appropriate.

All variants were submitted to both dbSNP (dbSNP Submitter Handle WTCCC) and for ImmunoChip design.

#### **Type 1 diabetes**

|                   |                          |
|-------------------|--------------------------|
| <i>IFIH1</i>      | chr2:162704739-163072739 |
| <i>CTLA4/ICOS</i> | chr2:204386046-204533060 |
| <i>IL2/IL21</i>   | chr4:123155845-123804957 |
| <i>IL2RA</i>      | chr10:6068112-6311849    |
| <i>ERBB3</i>      | chr12:54632267-55043535  |
| <i>CLEC16A</i>    | chr16:10899000-11217000  |
| <i>CD226</i>      | chr18:65659000-65725000  |

#### **Crohn's disease**

|                       |                              |
|-----------------------|------------------------------|
| <i>IL23R</i>          | chr1:67426567-67540567       |
| <i>CD244</i>          | chr1:159073551-159178551     |
| -                     | chr5:40323000-40660000       |
| <i>IRGM</i>           | chr5:150151000-150318000     |
| <i>IL12B</i>          | chr5:158688000-158758500     |
| <i>CDKALI</i>         | chr6:20630000-20842000       |
| -                     | chr6:106514000-106616000     |
| <i>CCR6</i>           | chr6:167264579-167466579     |
| -                     | chr7:50223285-50304285       |
| -                     | chr8:126594000-126615500     |
| <i>TNFSF8/TNFSF15</i> | chr9:116,572,267-116,740,267 |
| <i>ZNF365</i>         | chr10:64049000-64120000      |
| <i>NKX2-3</i>         | chr10:101257000-101319000    |
| <i>STAT3</i>          | chr17:37733000-37951000      |
| <i>PTPN2</i>          | chr18:12728000 -12878000     |
| <i>GPX4, SBNO2</i>    | chr19:1049000-1145000        |
| -                     | chr21:15720000-15764500      |
| <i>ICOSLG</i>         | chr21:44428000-44478000      |

#### **Ankylosing spondylitis**

|                    |                         |
|--------------------|-------------------------|
| -                  | chr2:62334538-62462791  |
| <i>IL1R1 IL1R2</i> | chr2:99909427-102280256 |
| <i>CAST, ERAP1</i> | chr5:96053960-96225604  |
| <i>TNFRSF1A</i>    | chr12:6284227-6404385   |
| -                  | chr21:39308249-39406803 |

**Rheumatoid arthritis**

|                |                          |
|----------------|--------------------------|
| <i>CD74</i>    | chr5:149663031-149779532 |
| <i>TNFAIP3</i> | chr6:138002656-138290619 |
| <i>PRKCQ</i>   | chr10:6427003-6673677    |
| multiple genes | chr12:56140929-56635212  |
| <i>CD40</i>    | chr20:44112612-44218338  |
| <i>IL2RB</i>   | chr22:35871557-35893351  |

**Supplementary Figure 1 QQ plot of association results at non-coeliac auto-immune, and bipolar disorder, regions.**  
Observed versus expected celiac disease association test results for immunoChip 1000Genomes dense-genotyped regions. Non-coeliac other immune-mediated disease loci (144 regions excluding HLA 20-40Mb, 67336 variants). Bipolar disorder (3 regions, 2769 variants) shown as a negative control (association statistic inflation factor, lambda, 1.018).

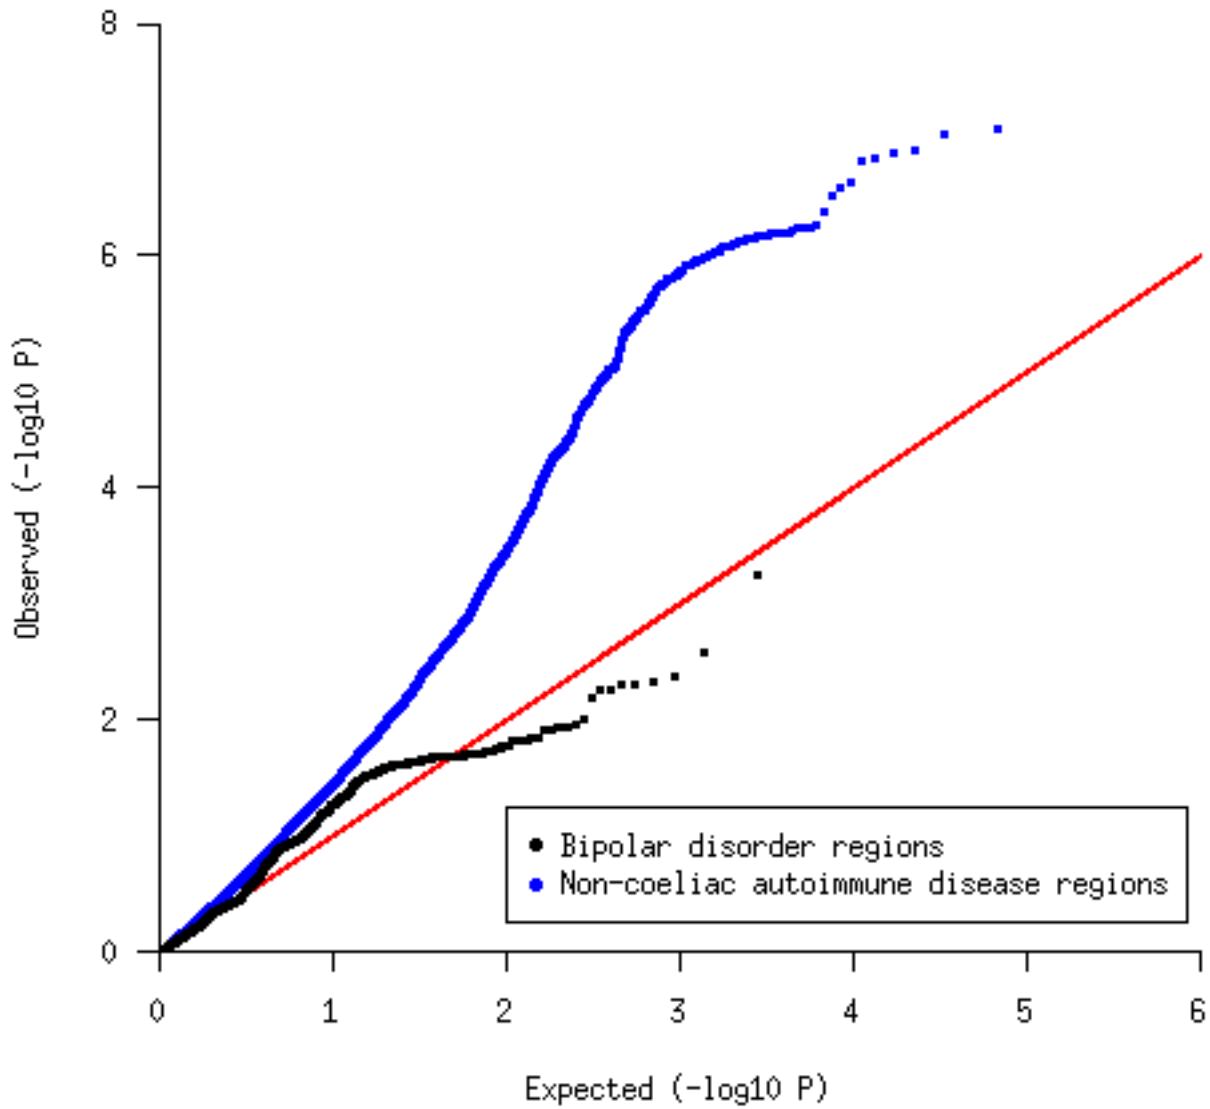

**Supplementary Figure 2**

Detailed association and linkage disequilibrium plots for each of 57 independent non-HLA celiac disease risk signals.

ImmunoChip

ImmunoChip

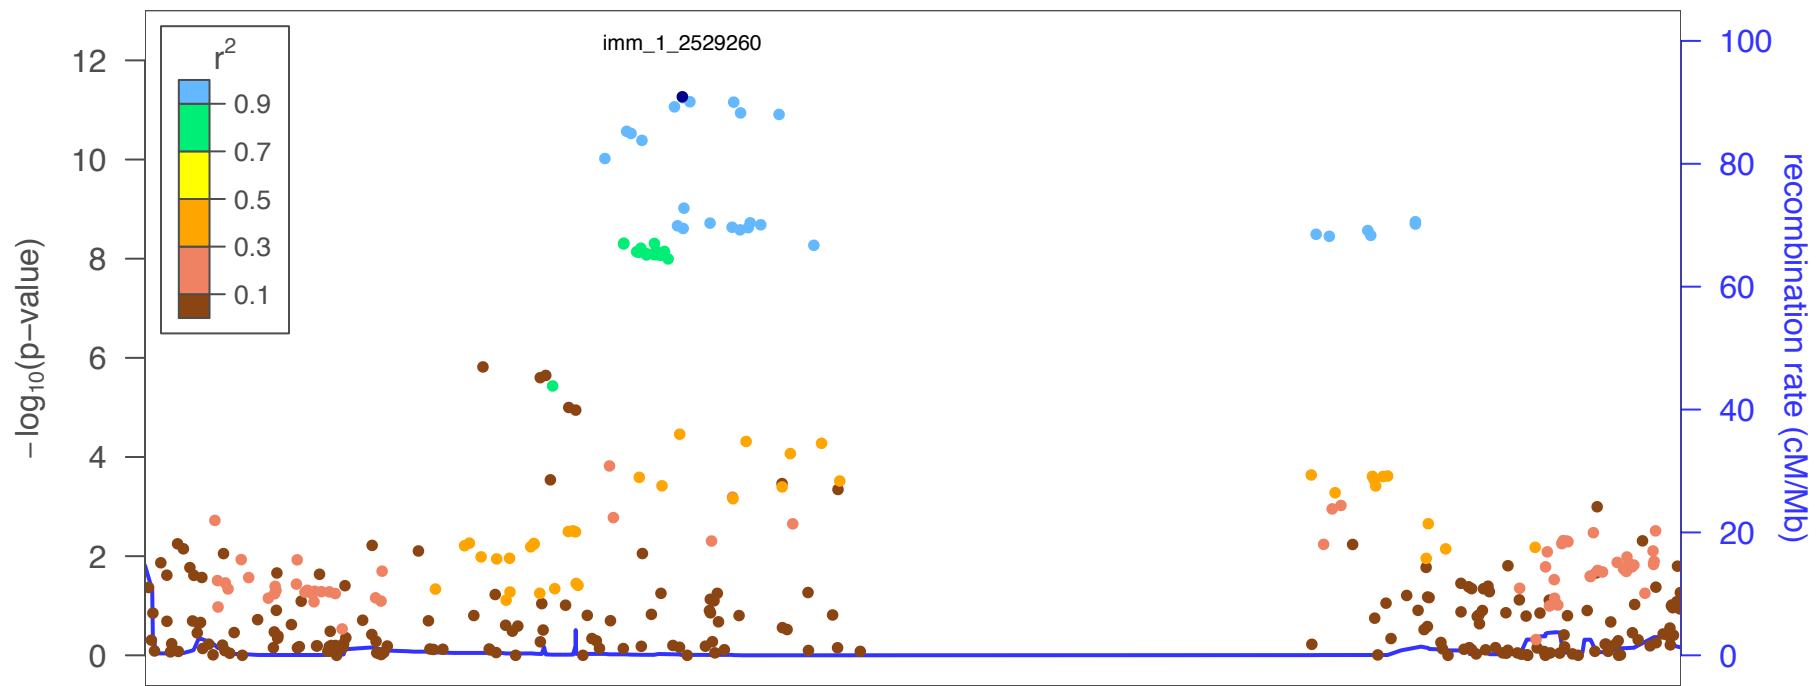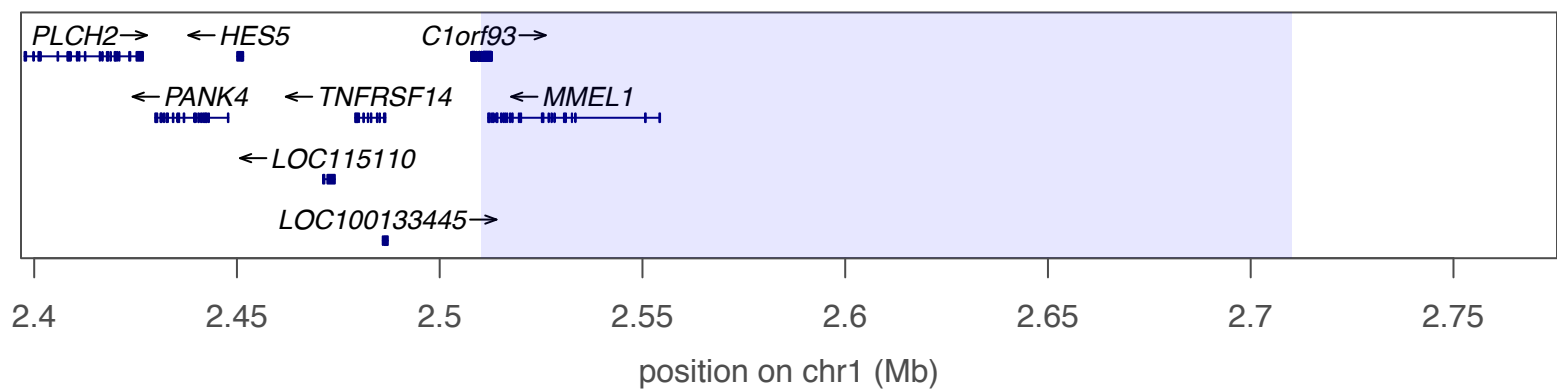

ImmunoChip

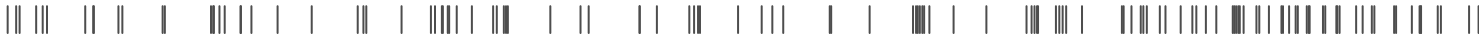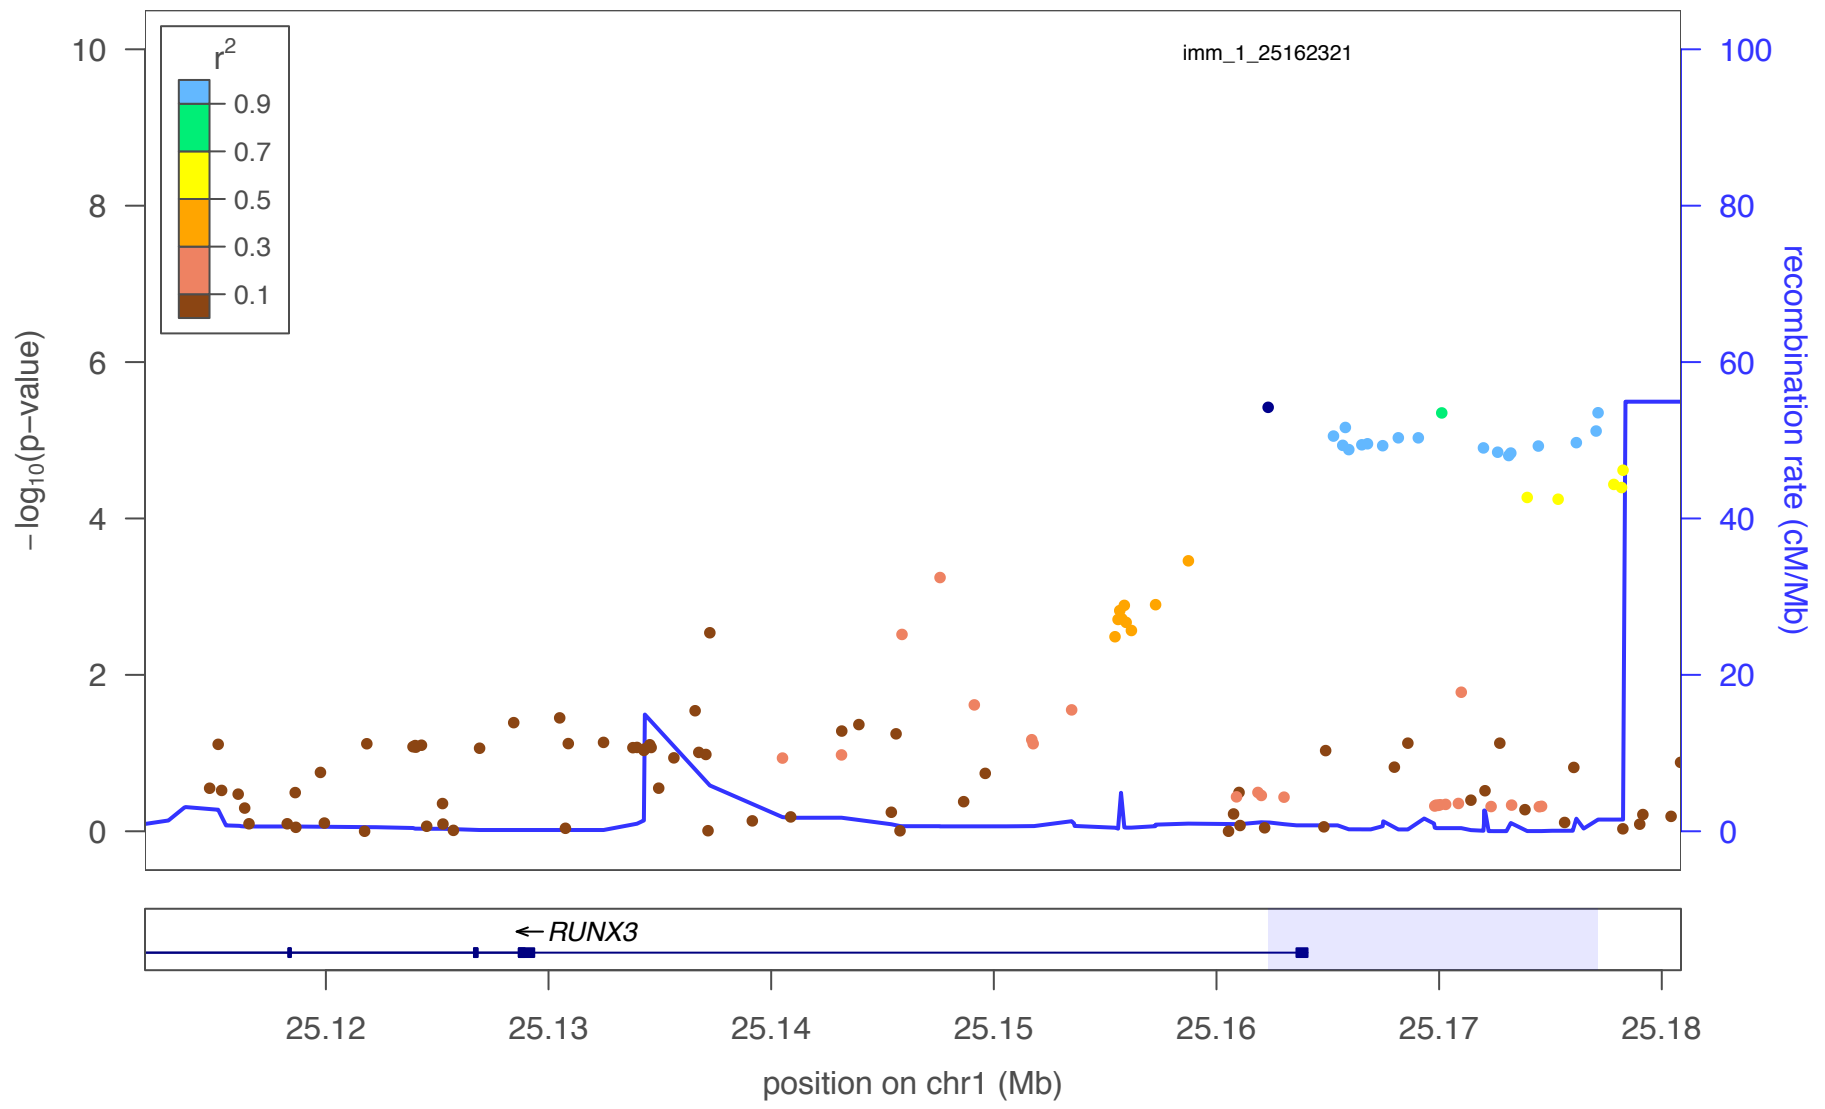





ImmunoChip

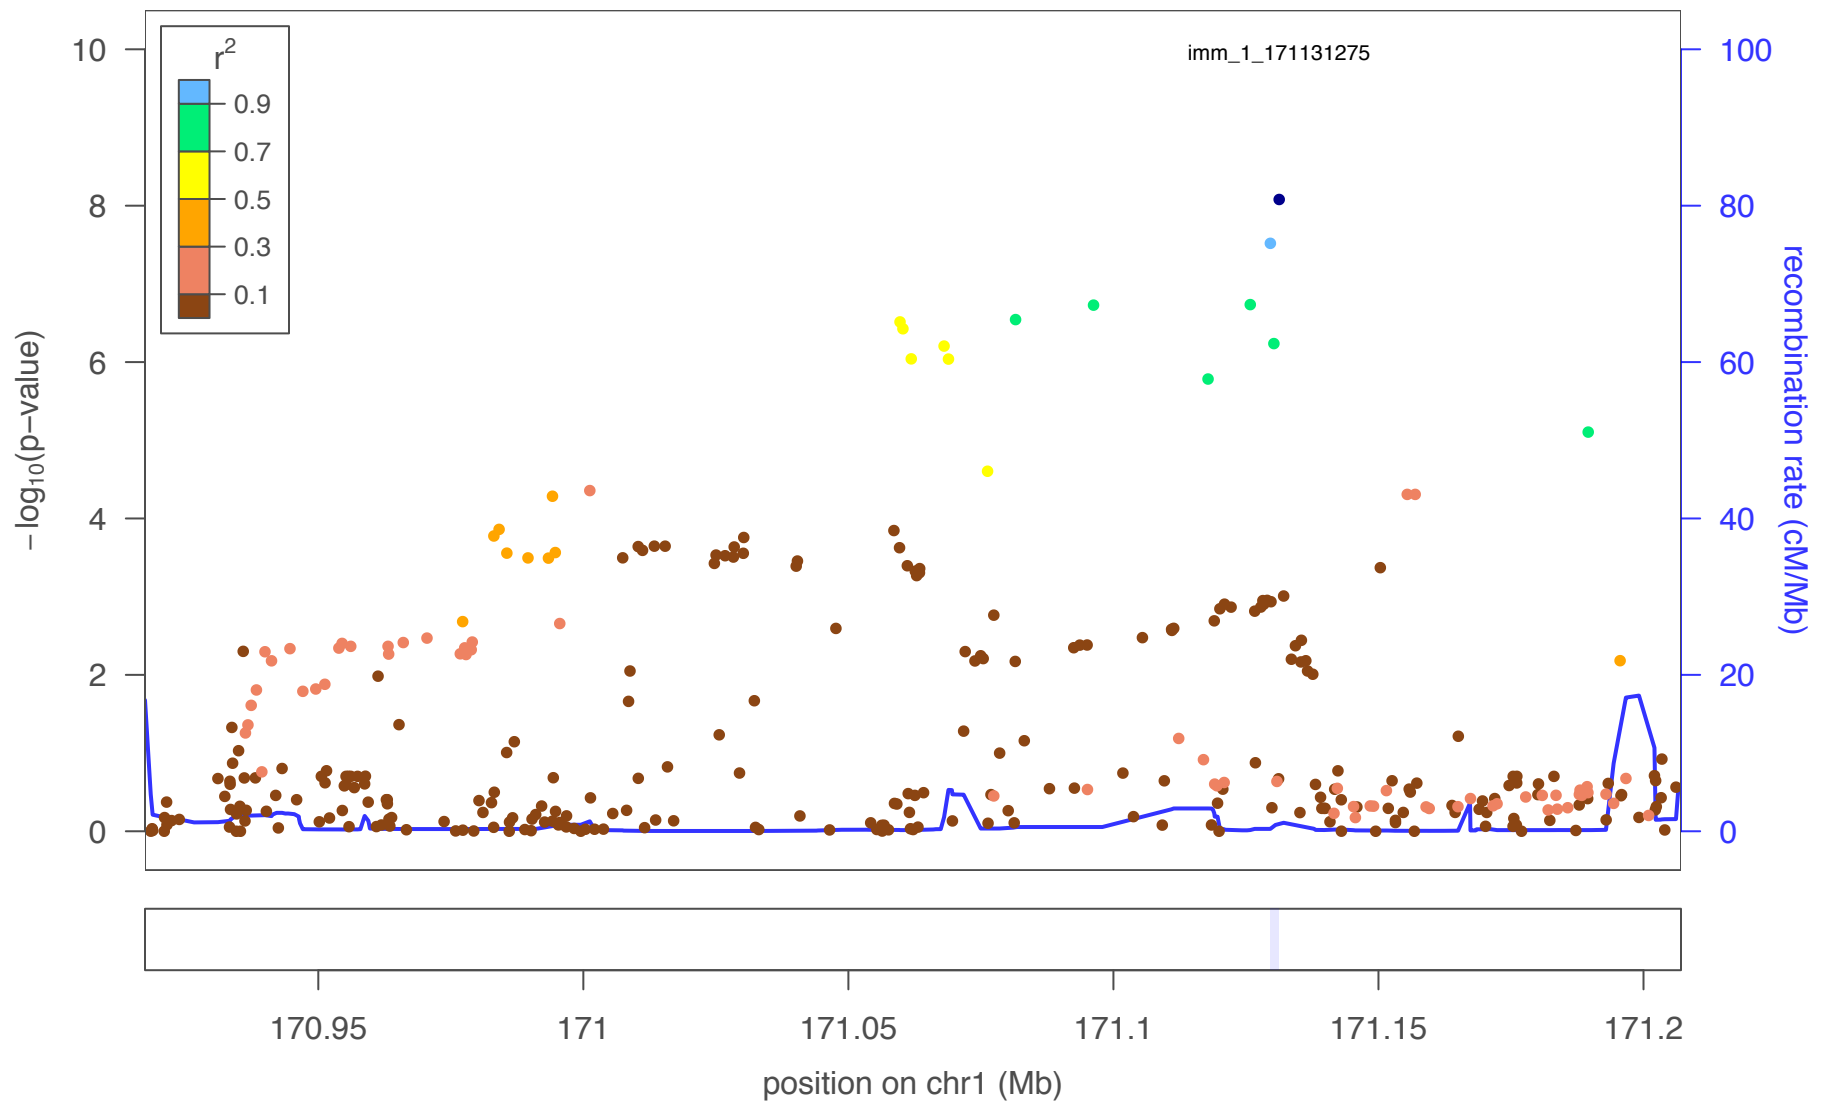

ImmunoChip || ||| || |

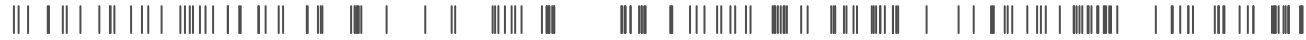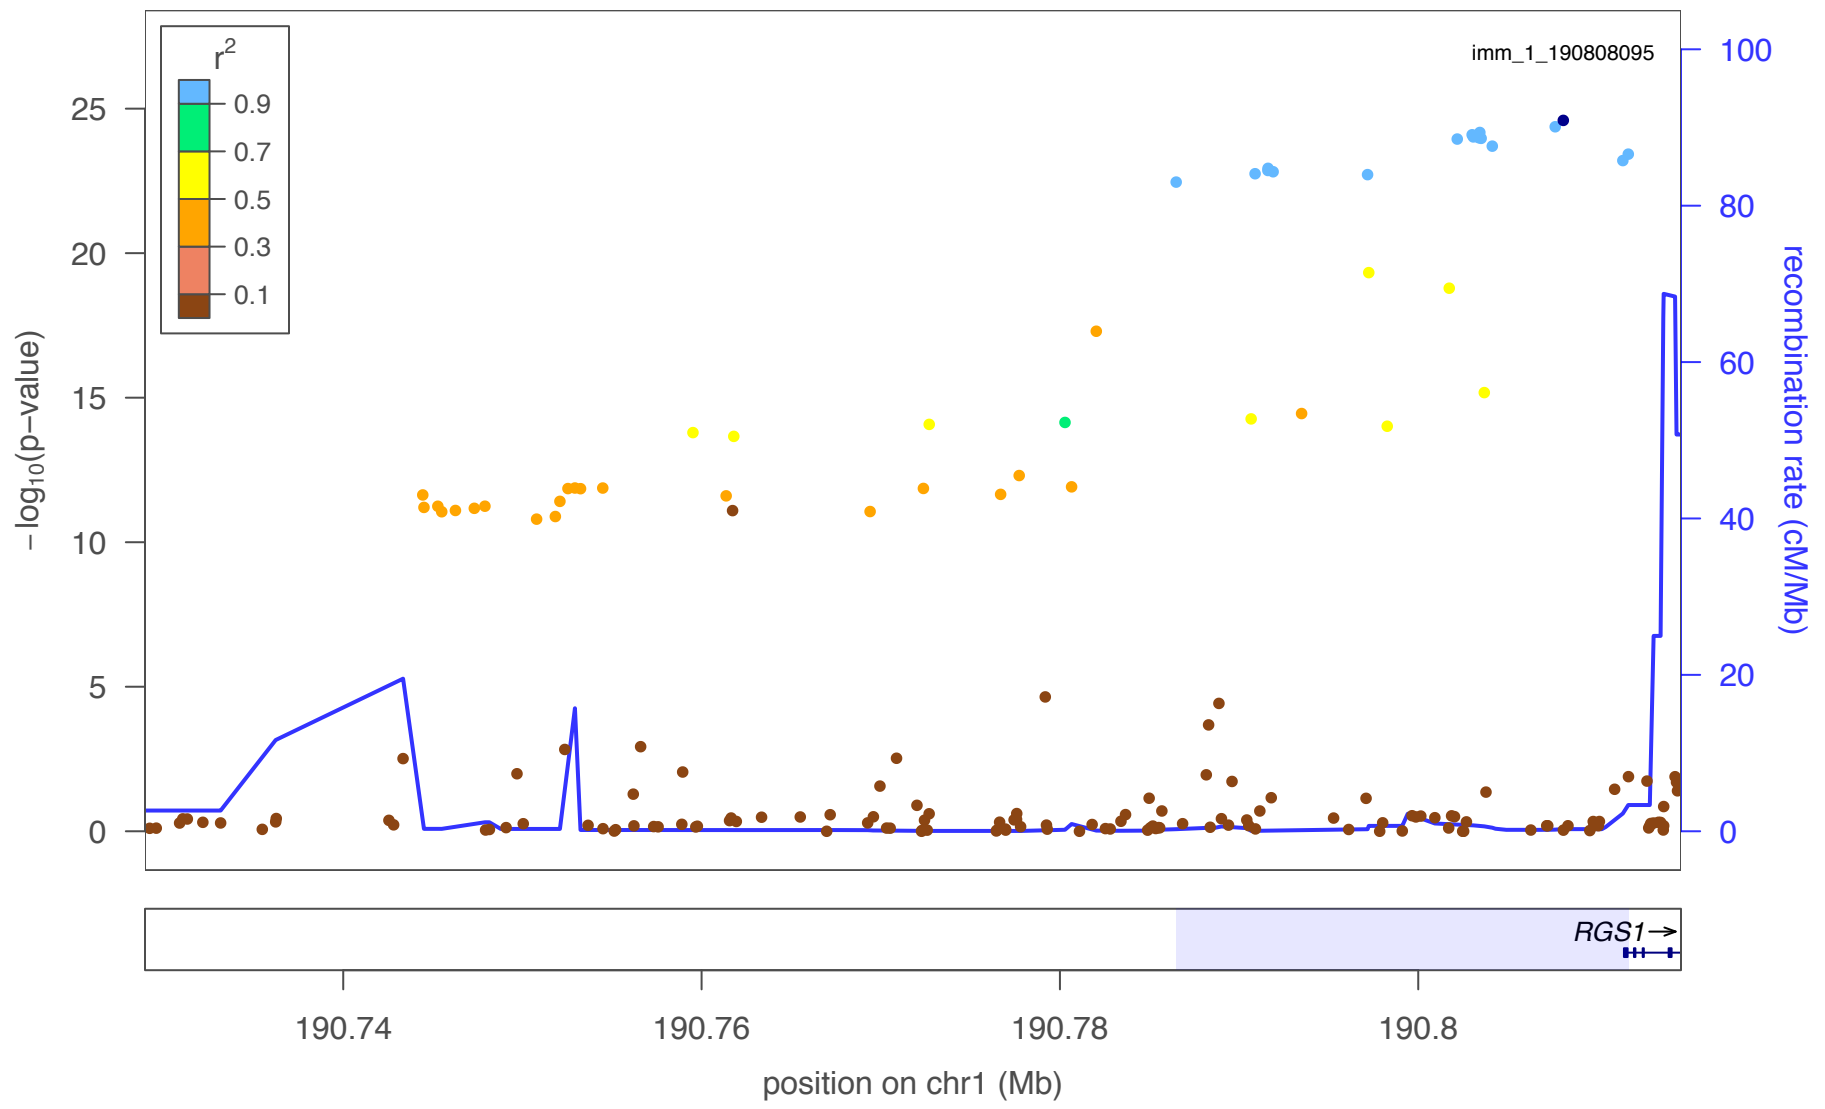

ImmunoChip || ||| || |

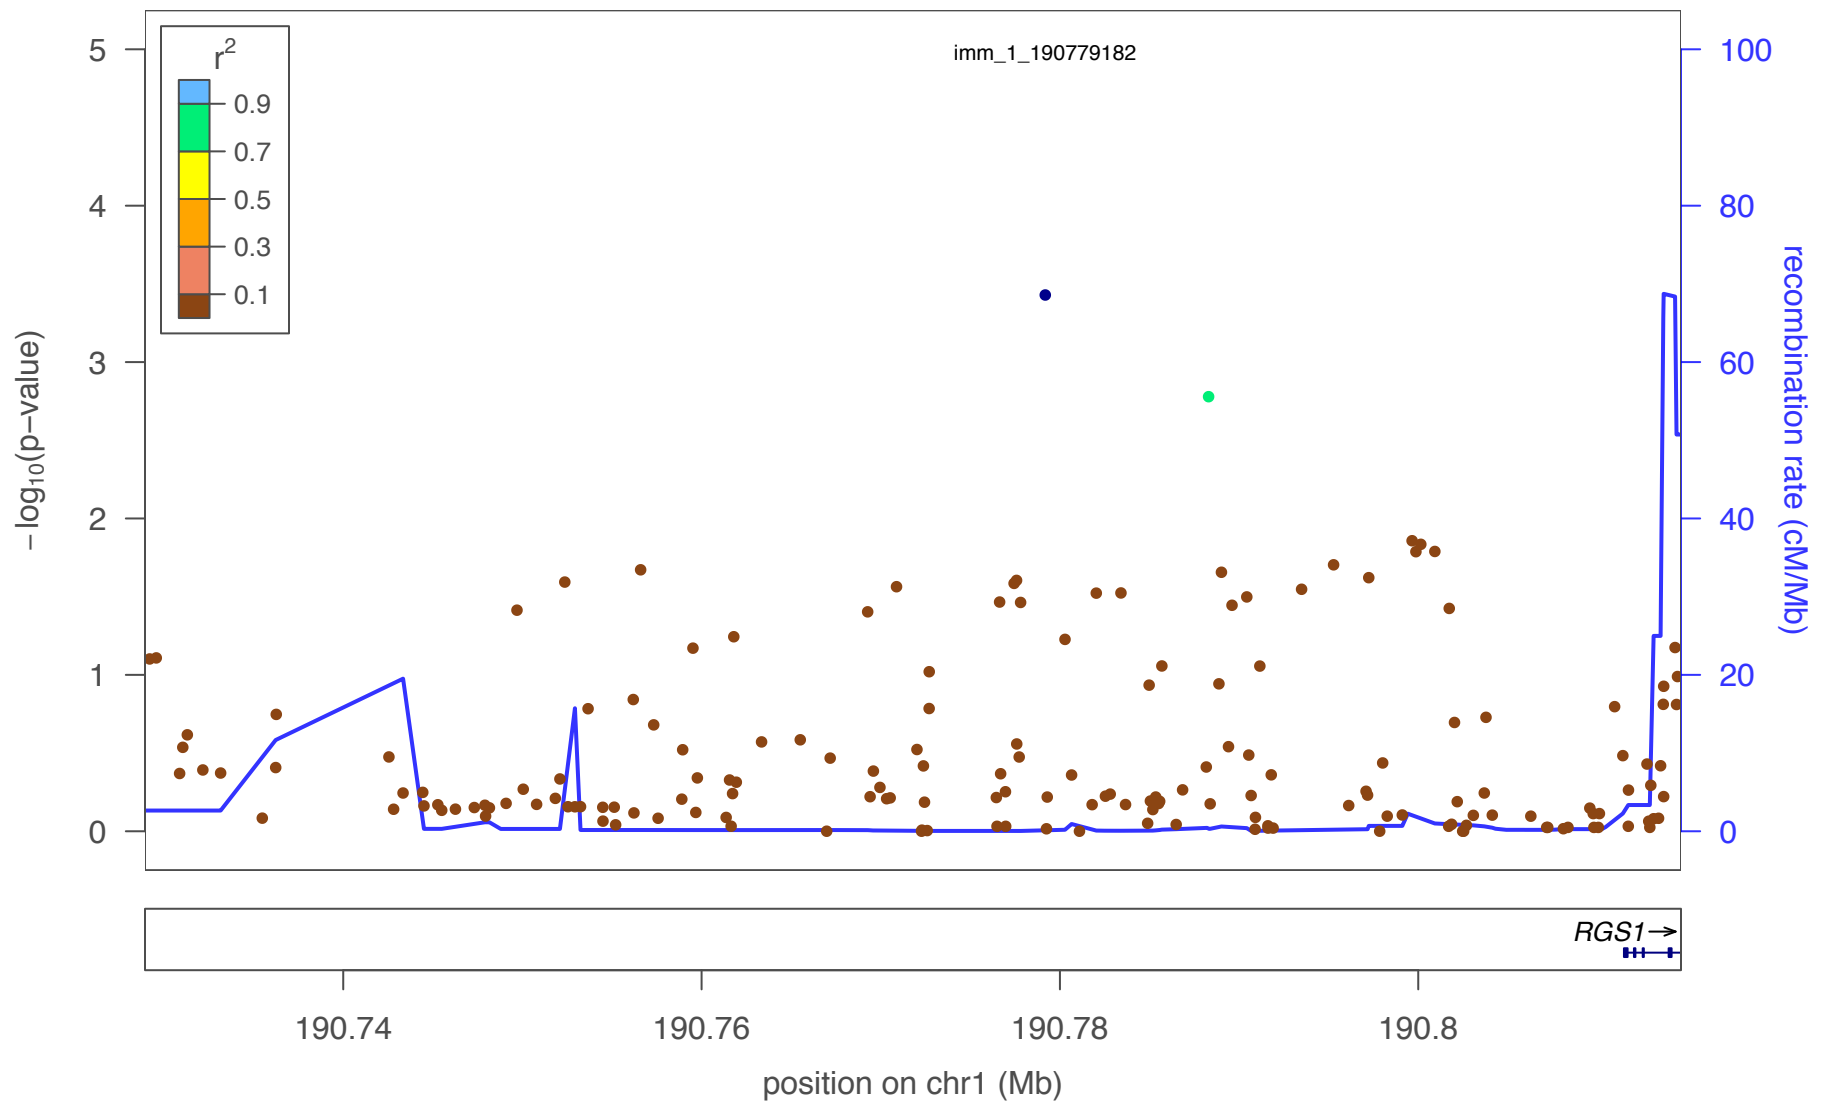

ImmunoChip 

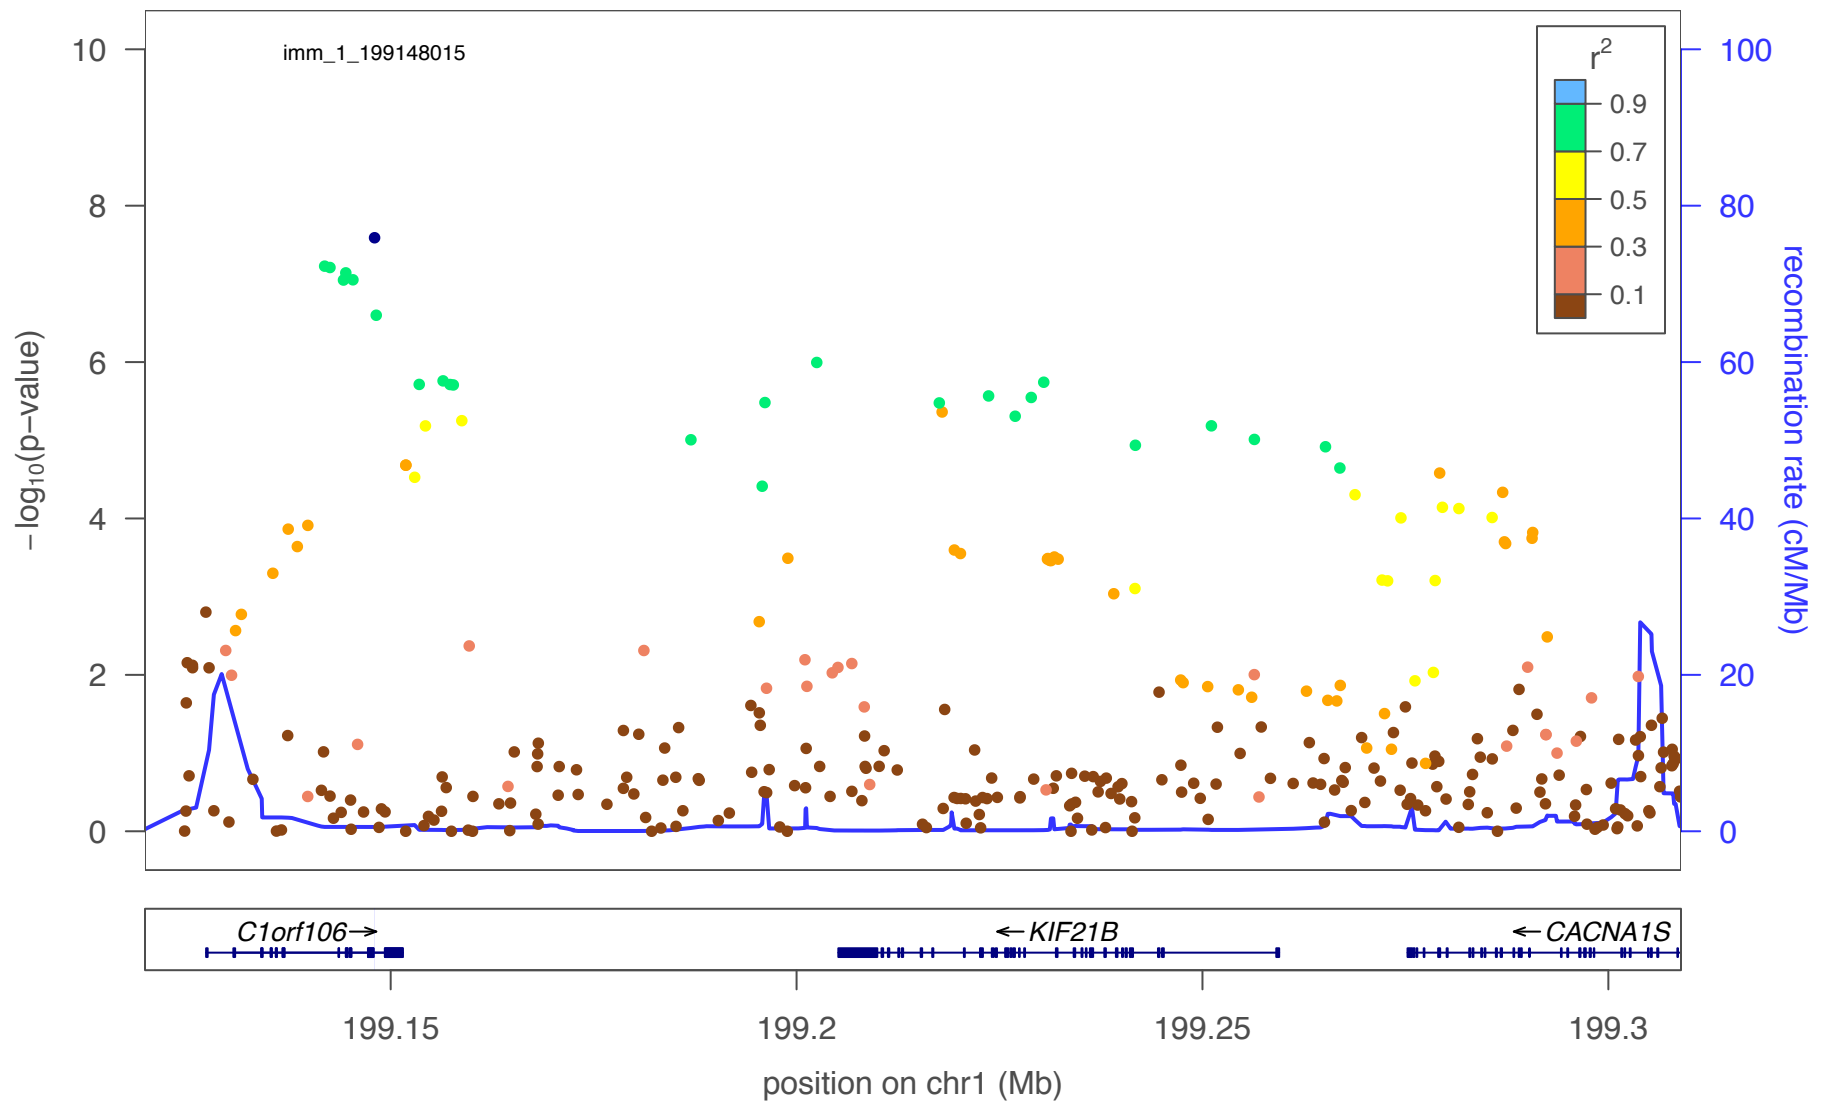

ImmunoChip

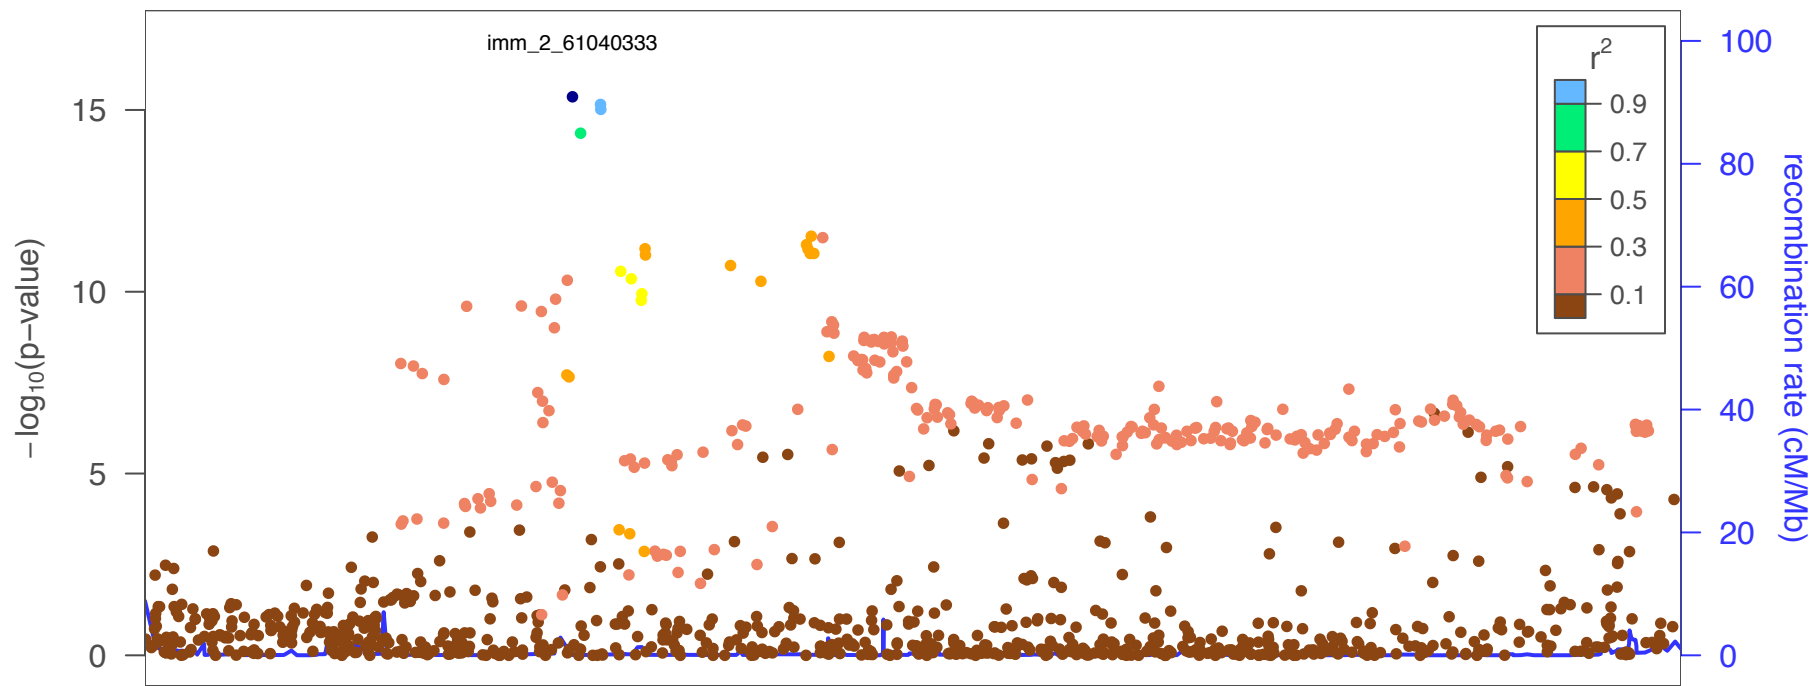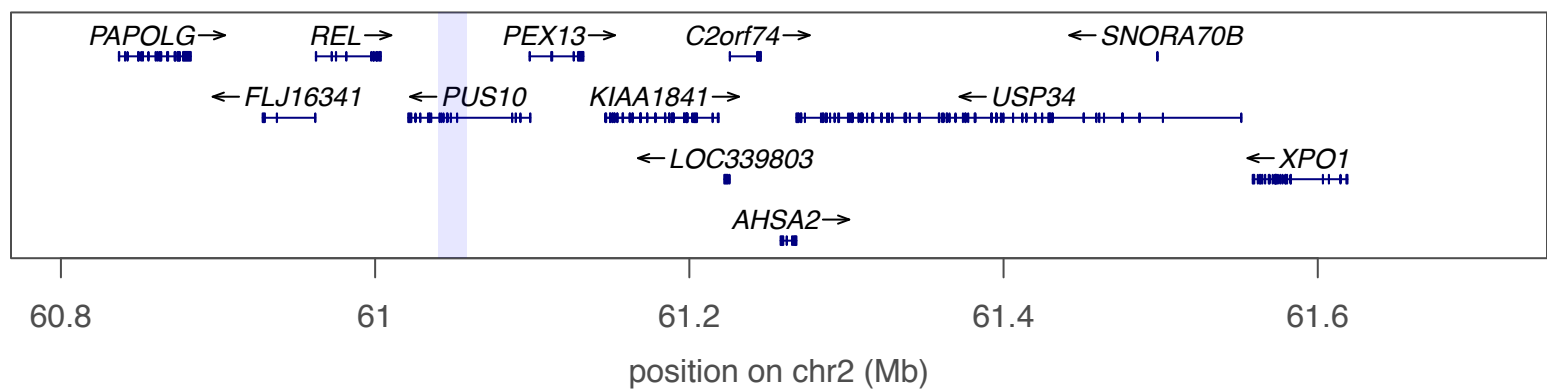

ImmunoChip 

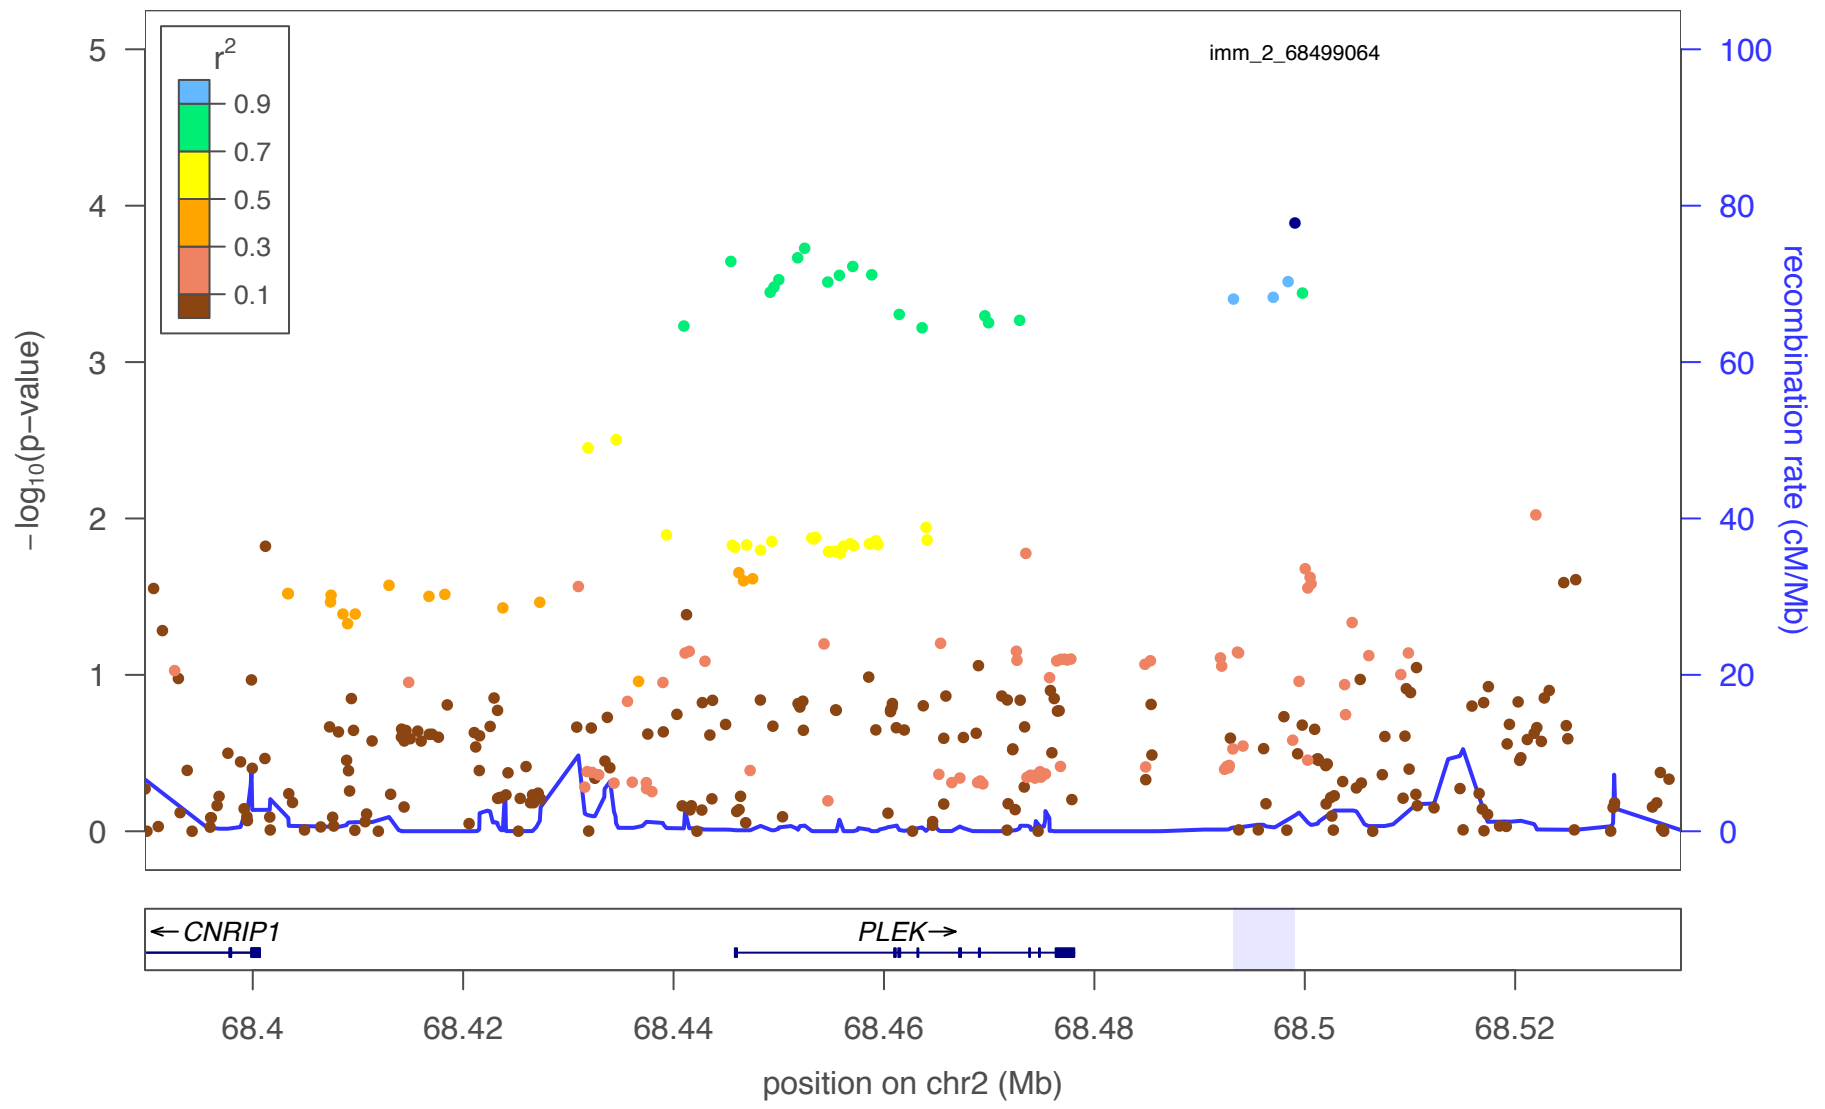

ImmunoChip

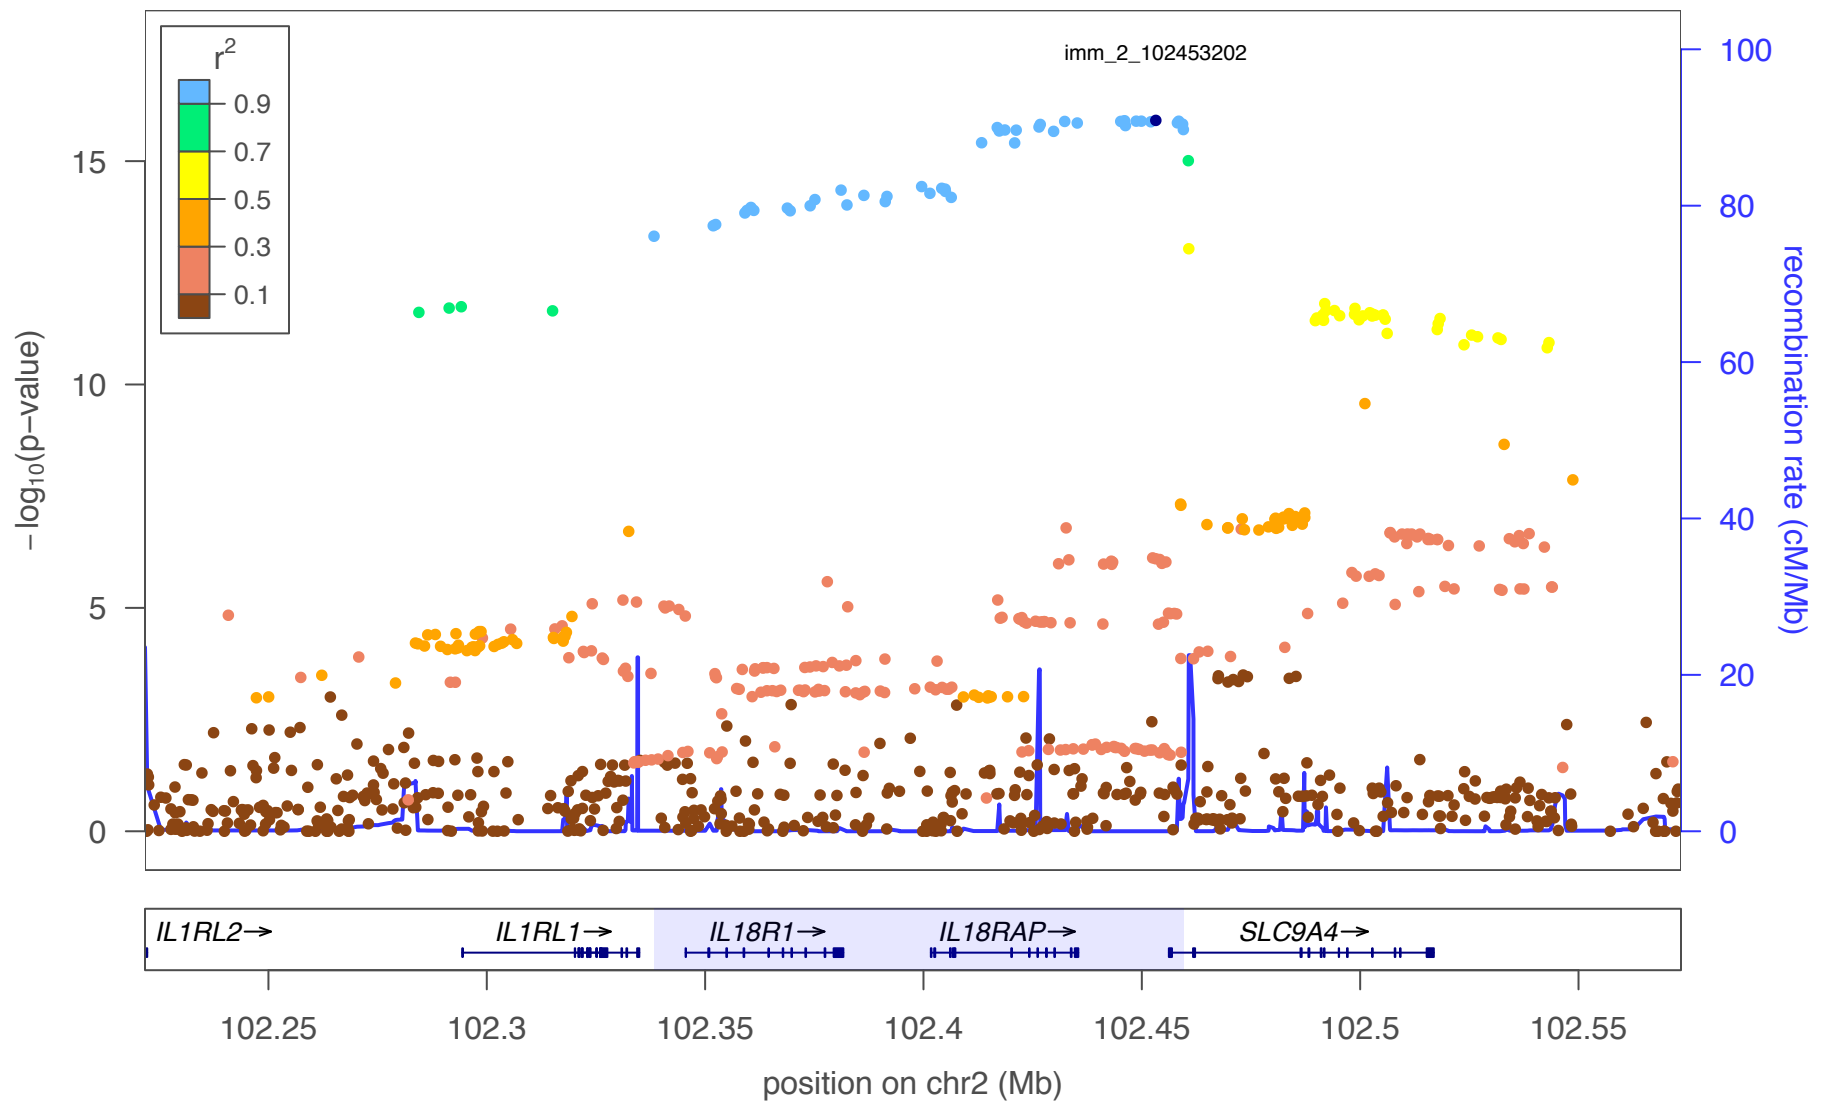

ImmunoChip

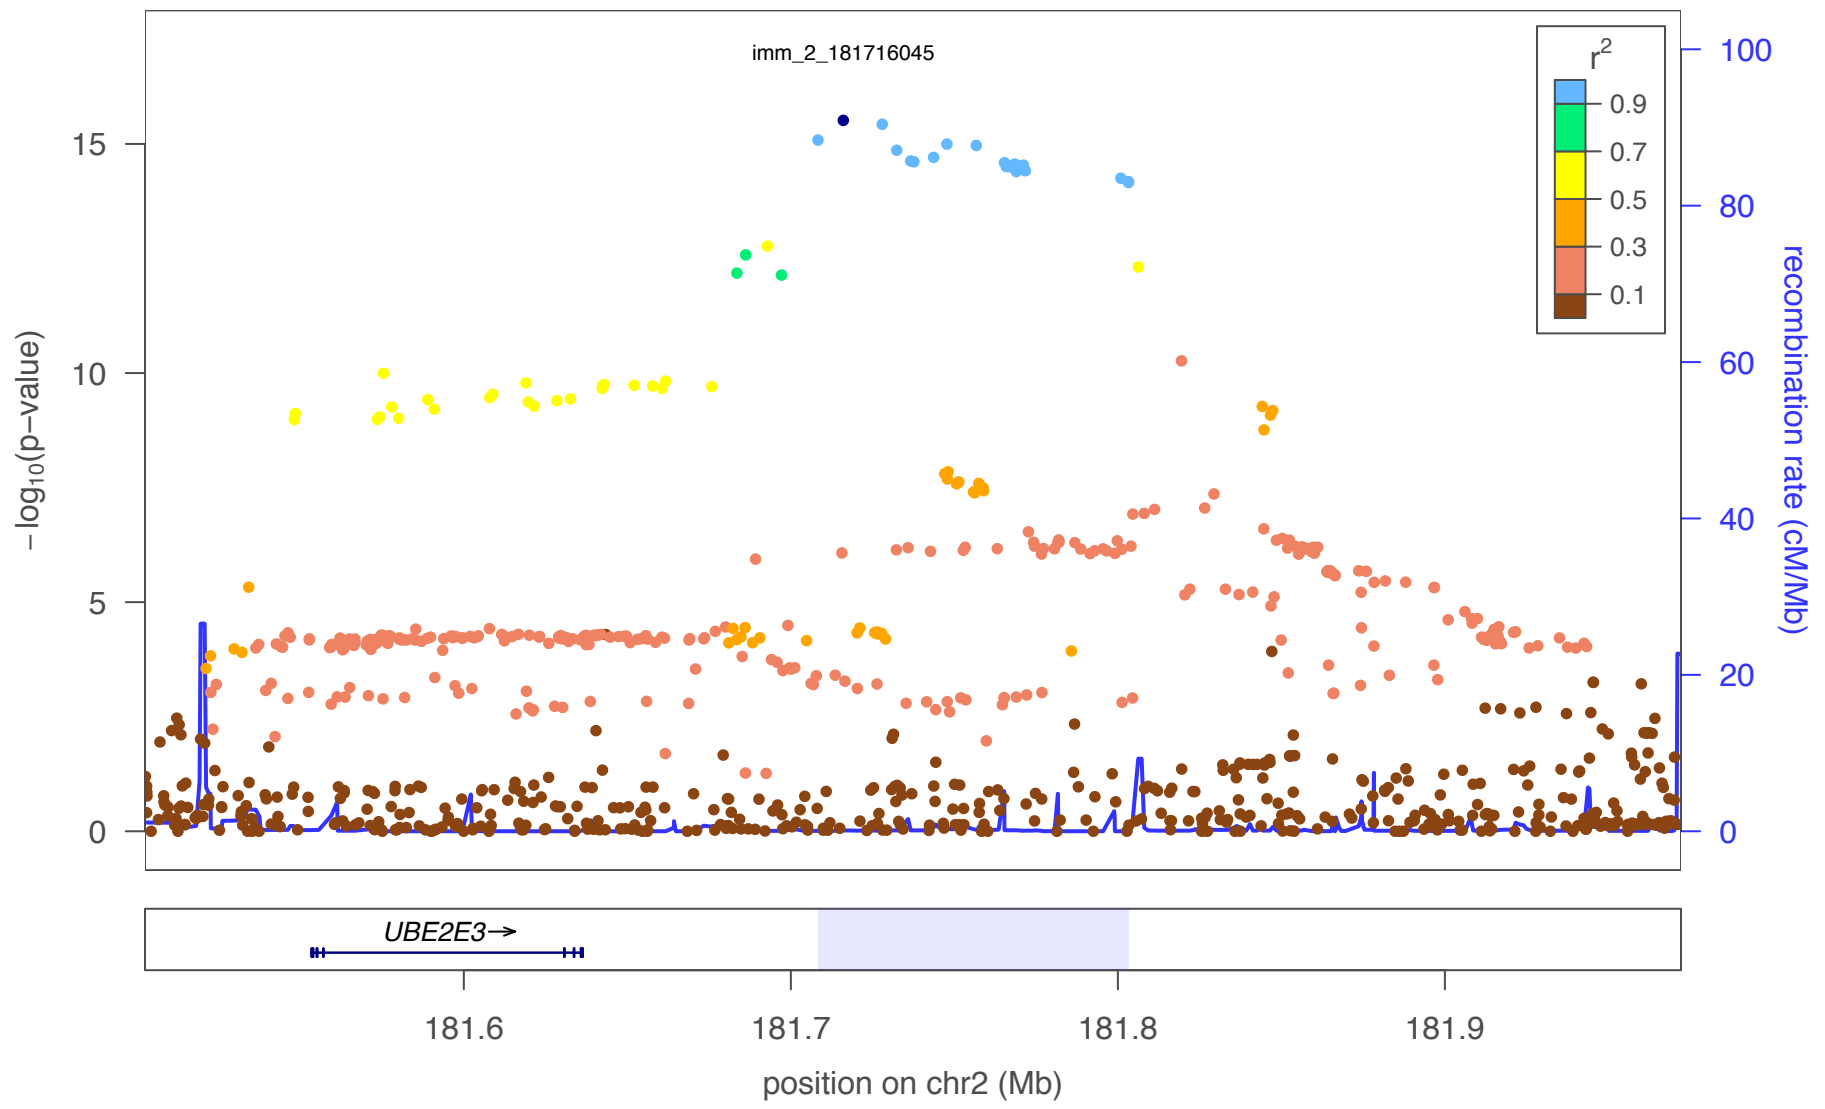



ImmunoChip 

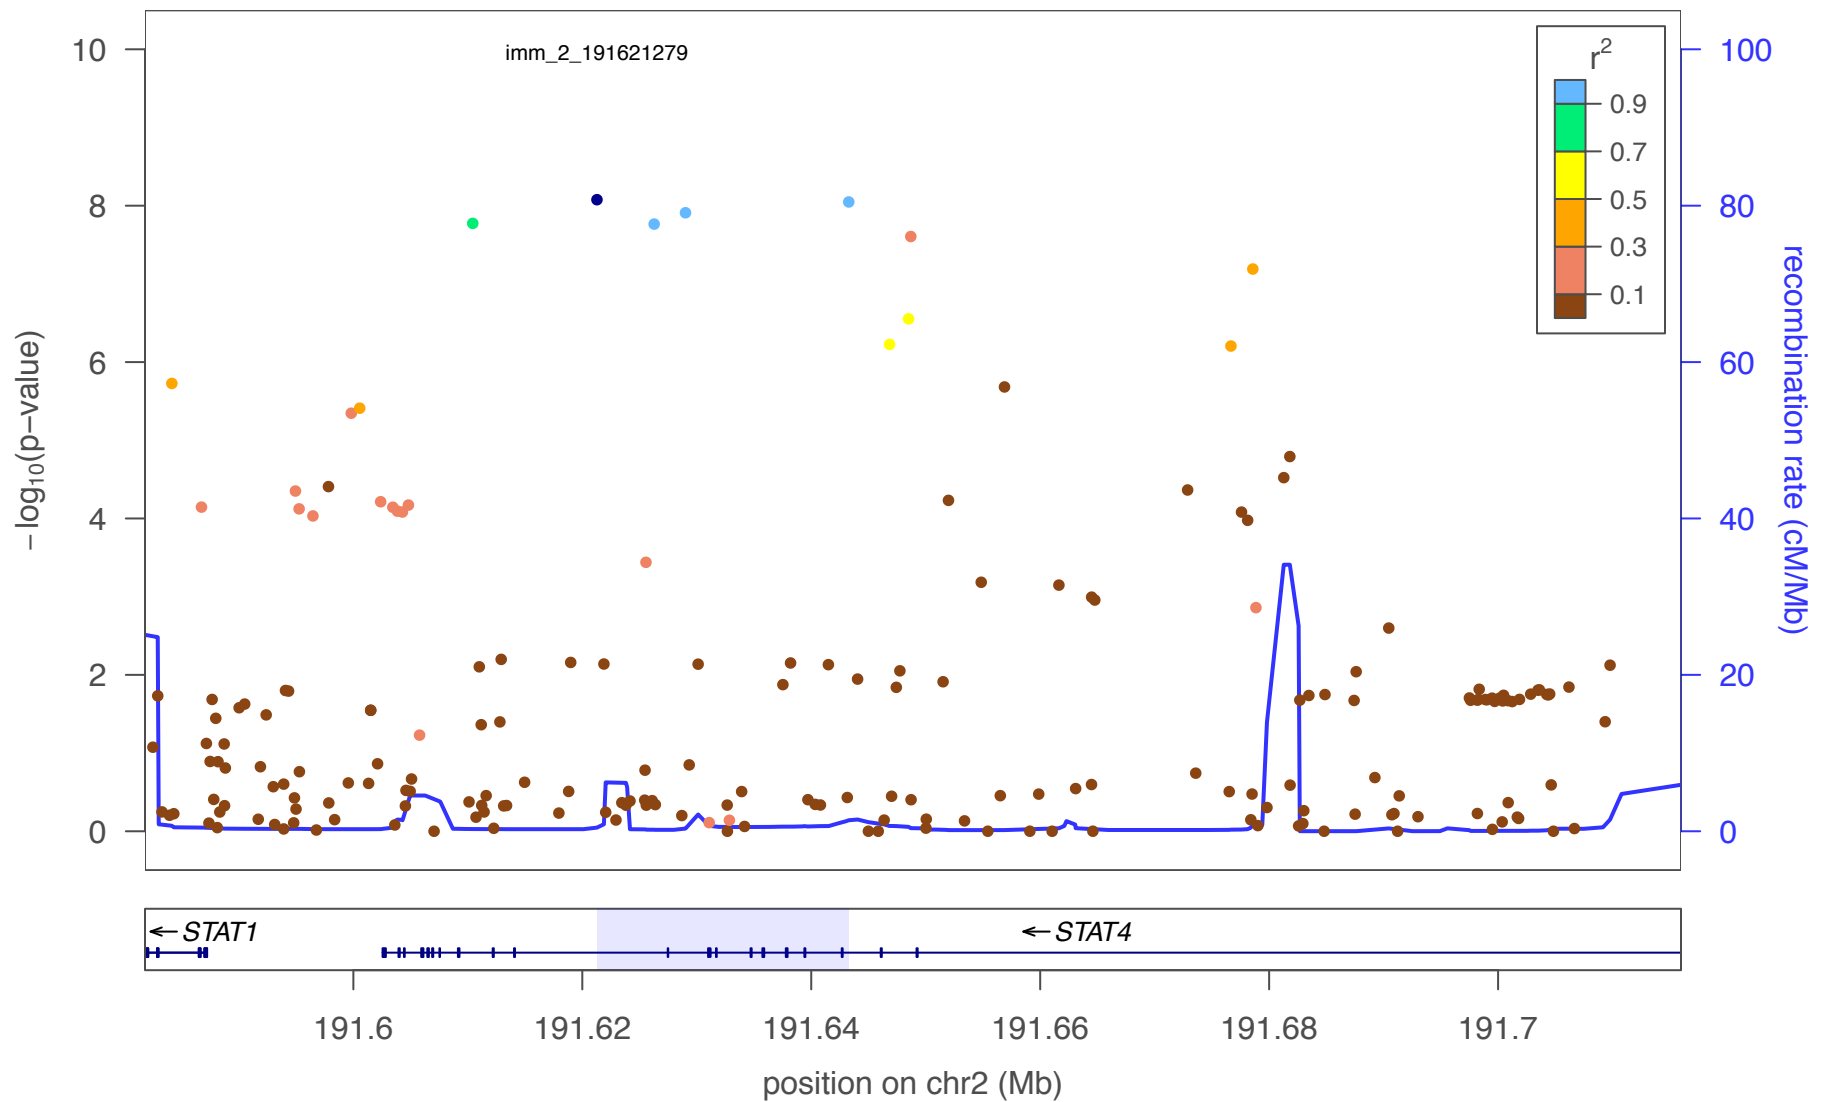

ImmunoChip 

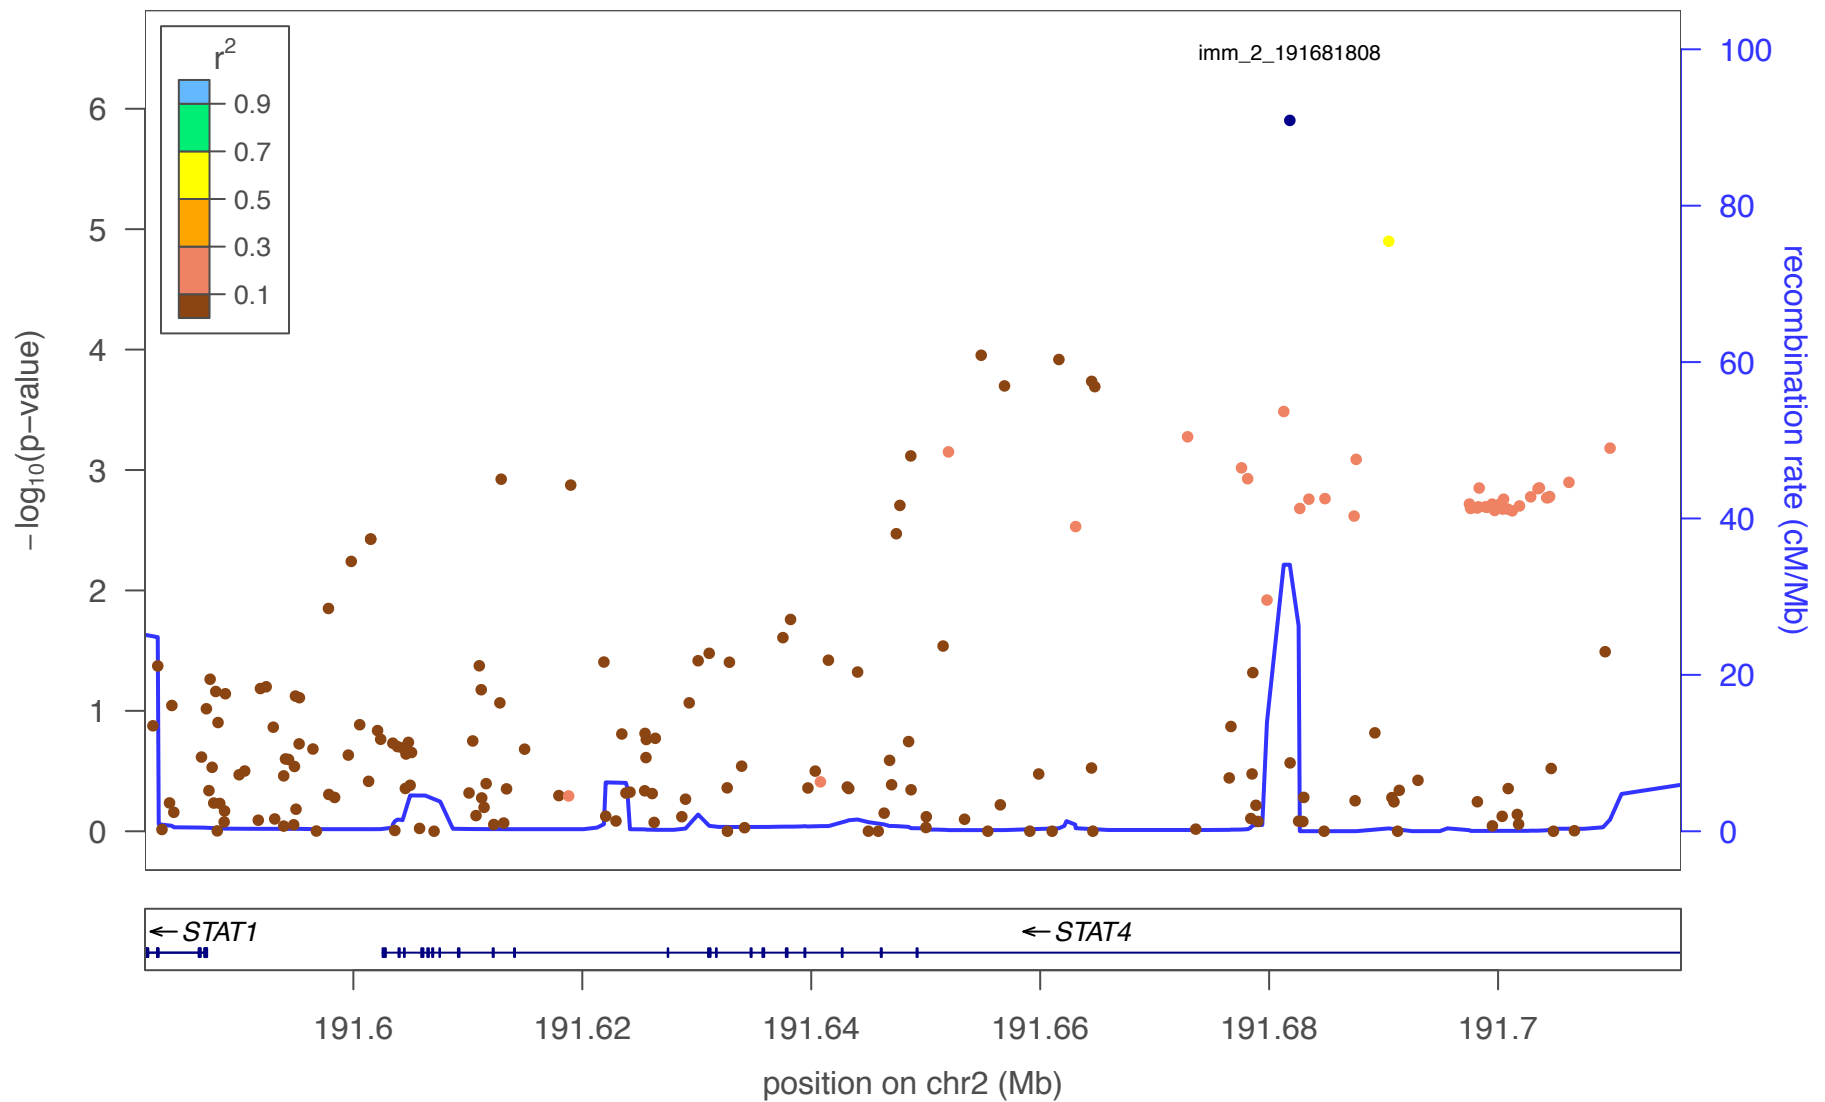

ImmunoChip

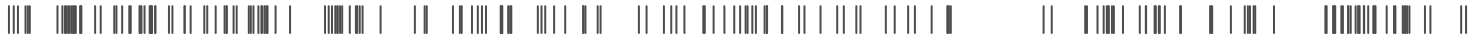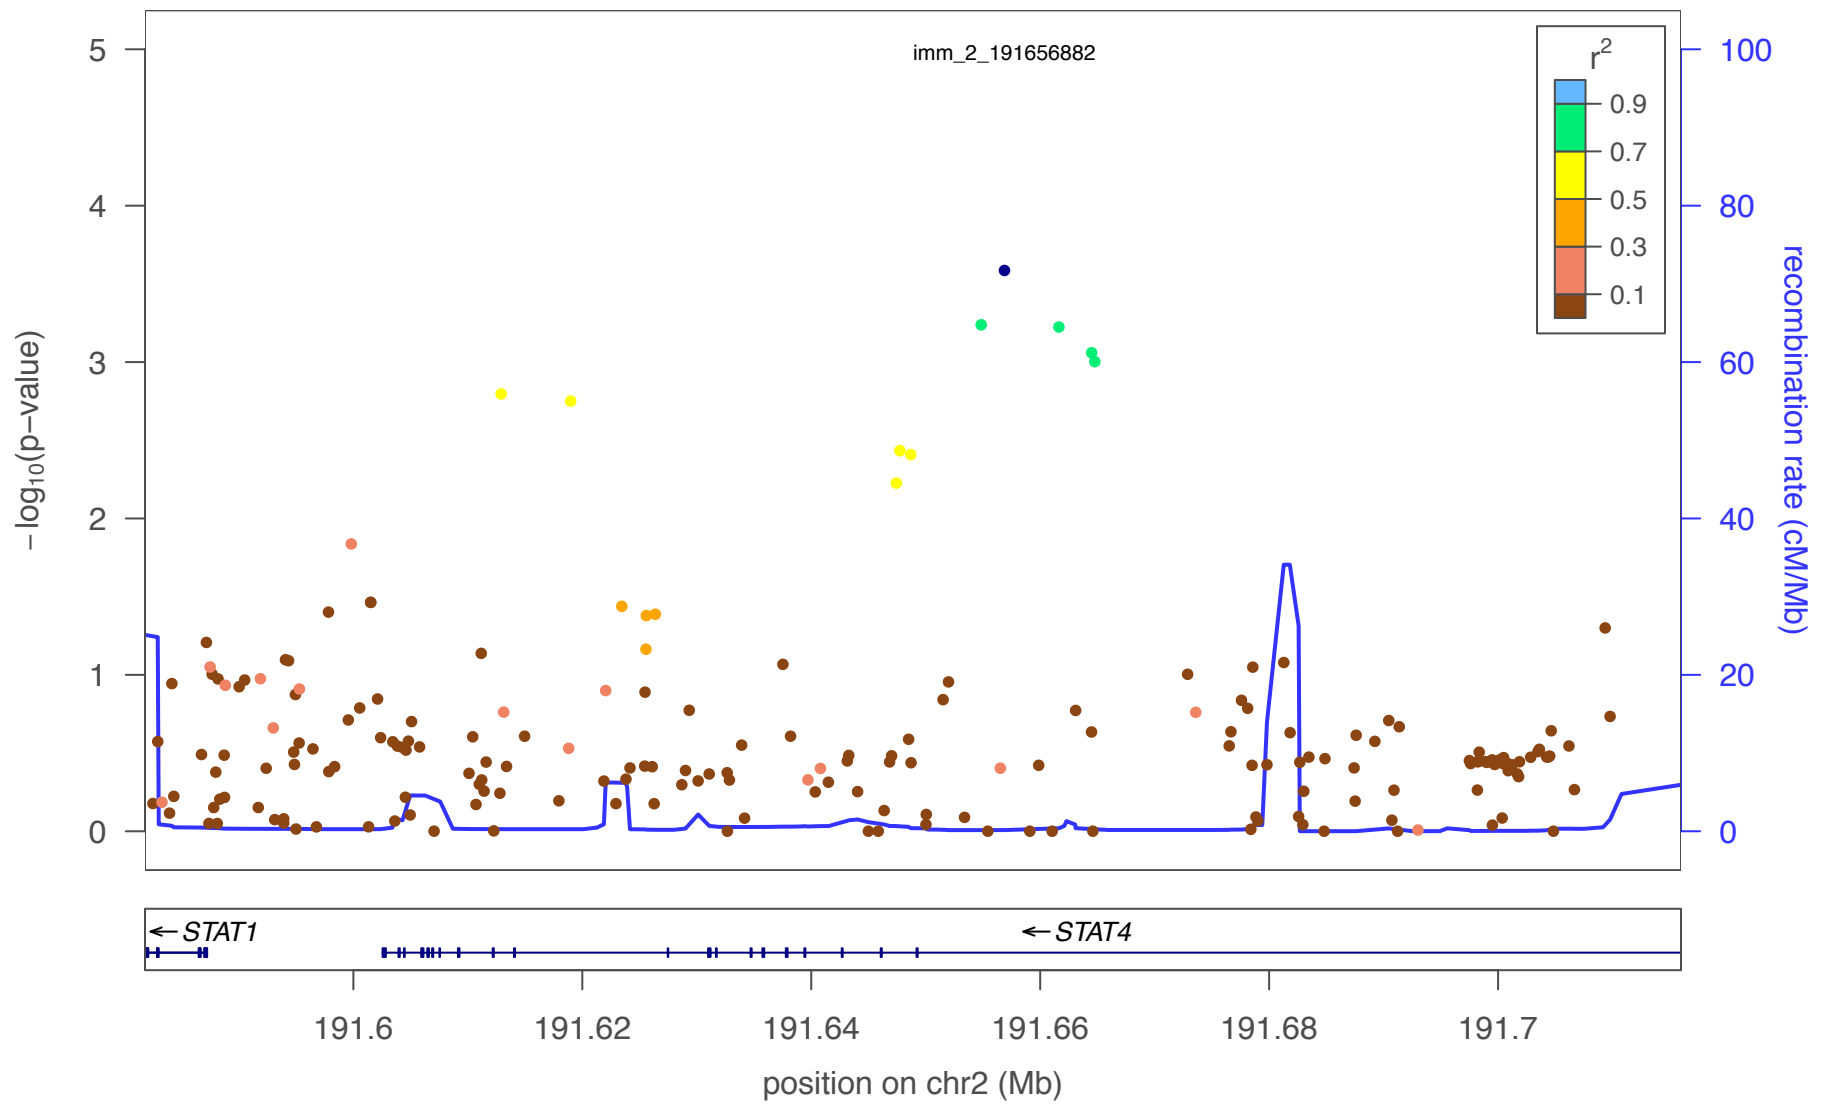

ImmunoChip

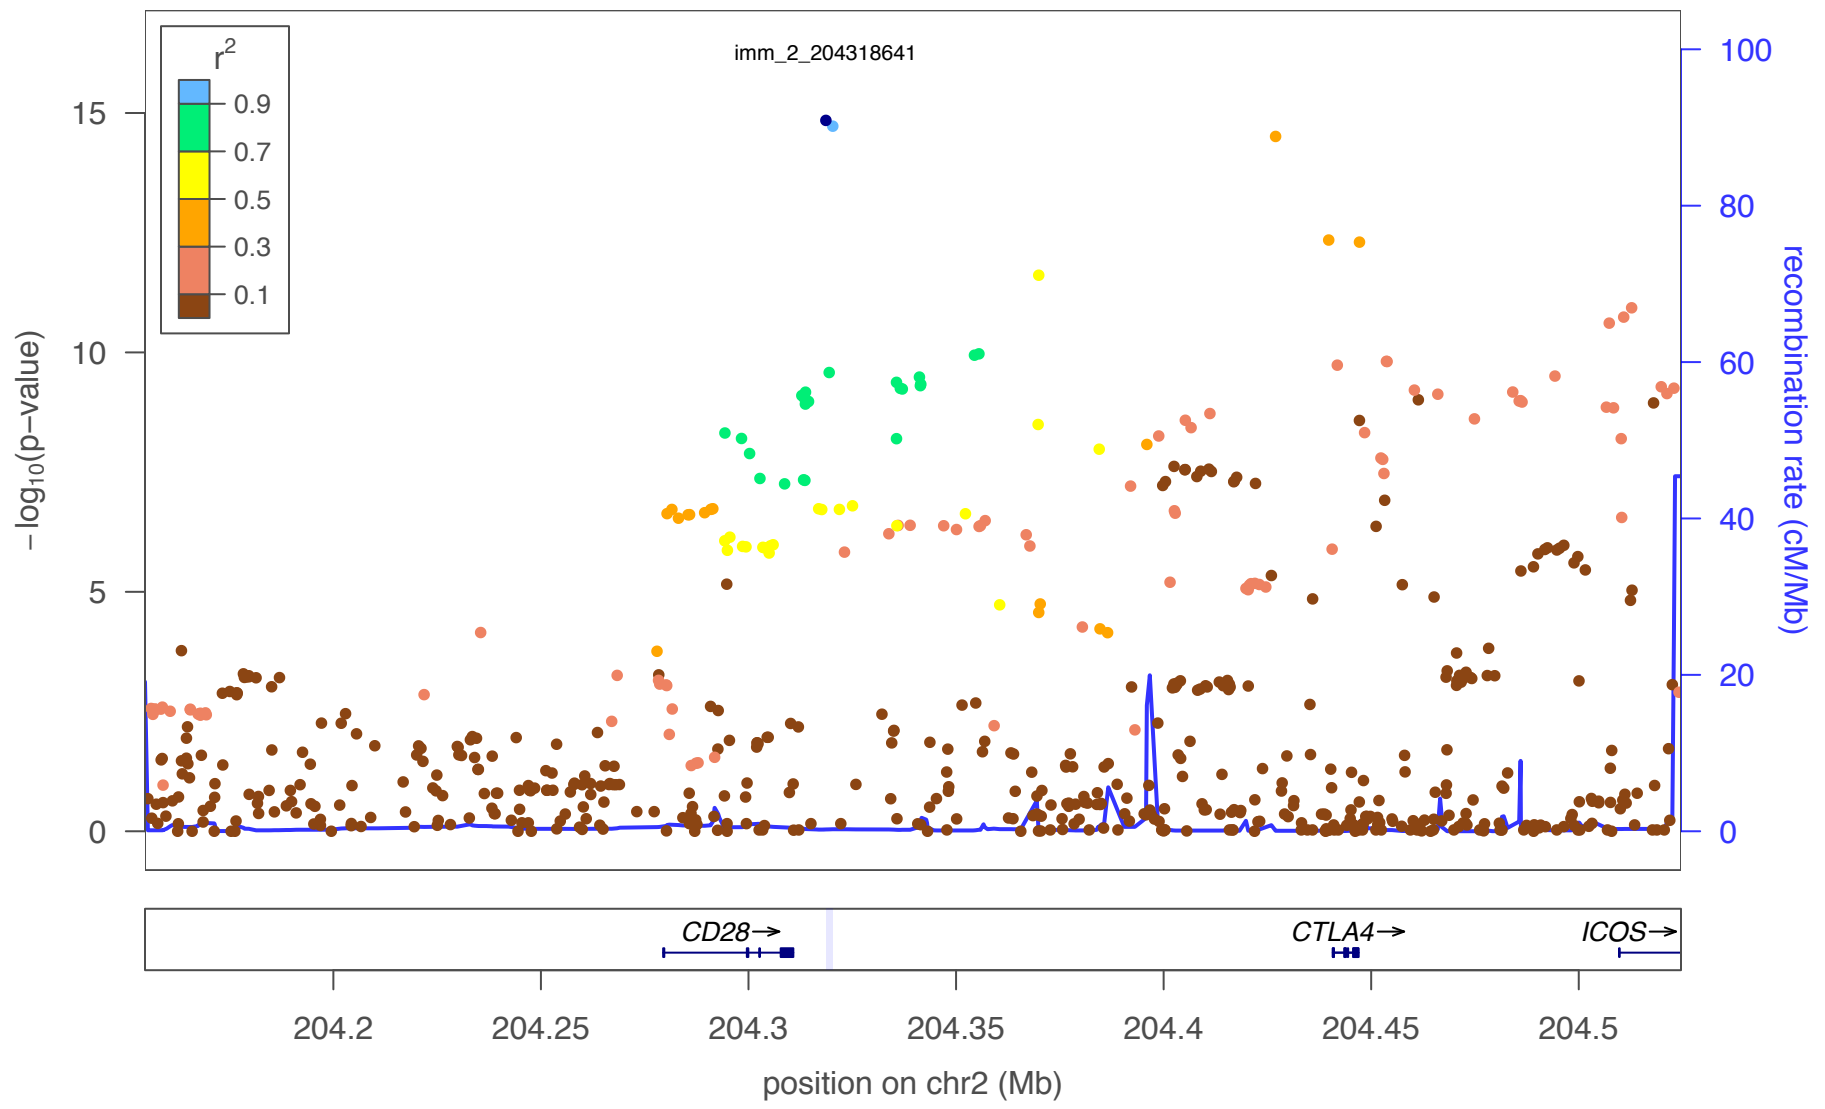

ImmunoChip

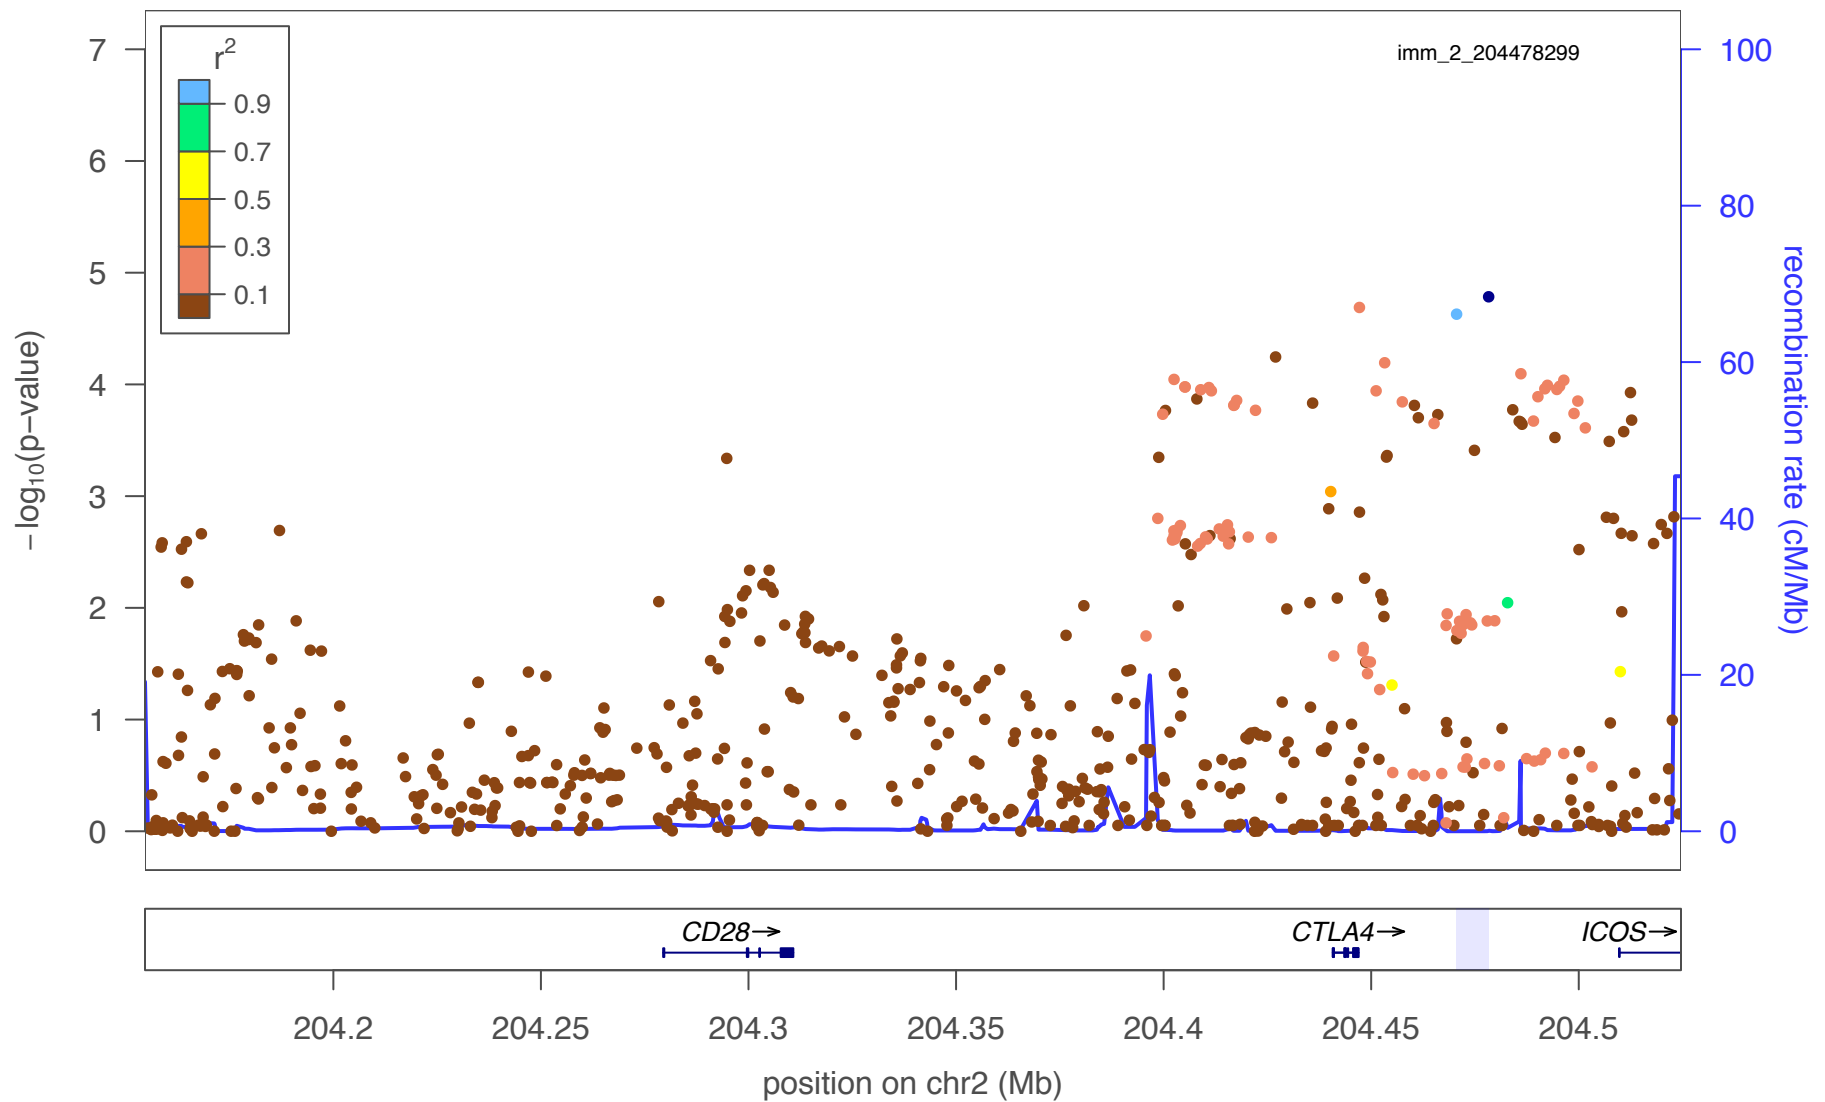

ImmunoChip

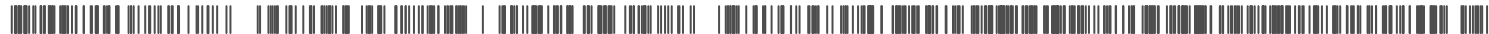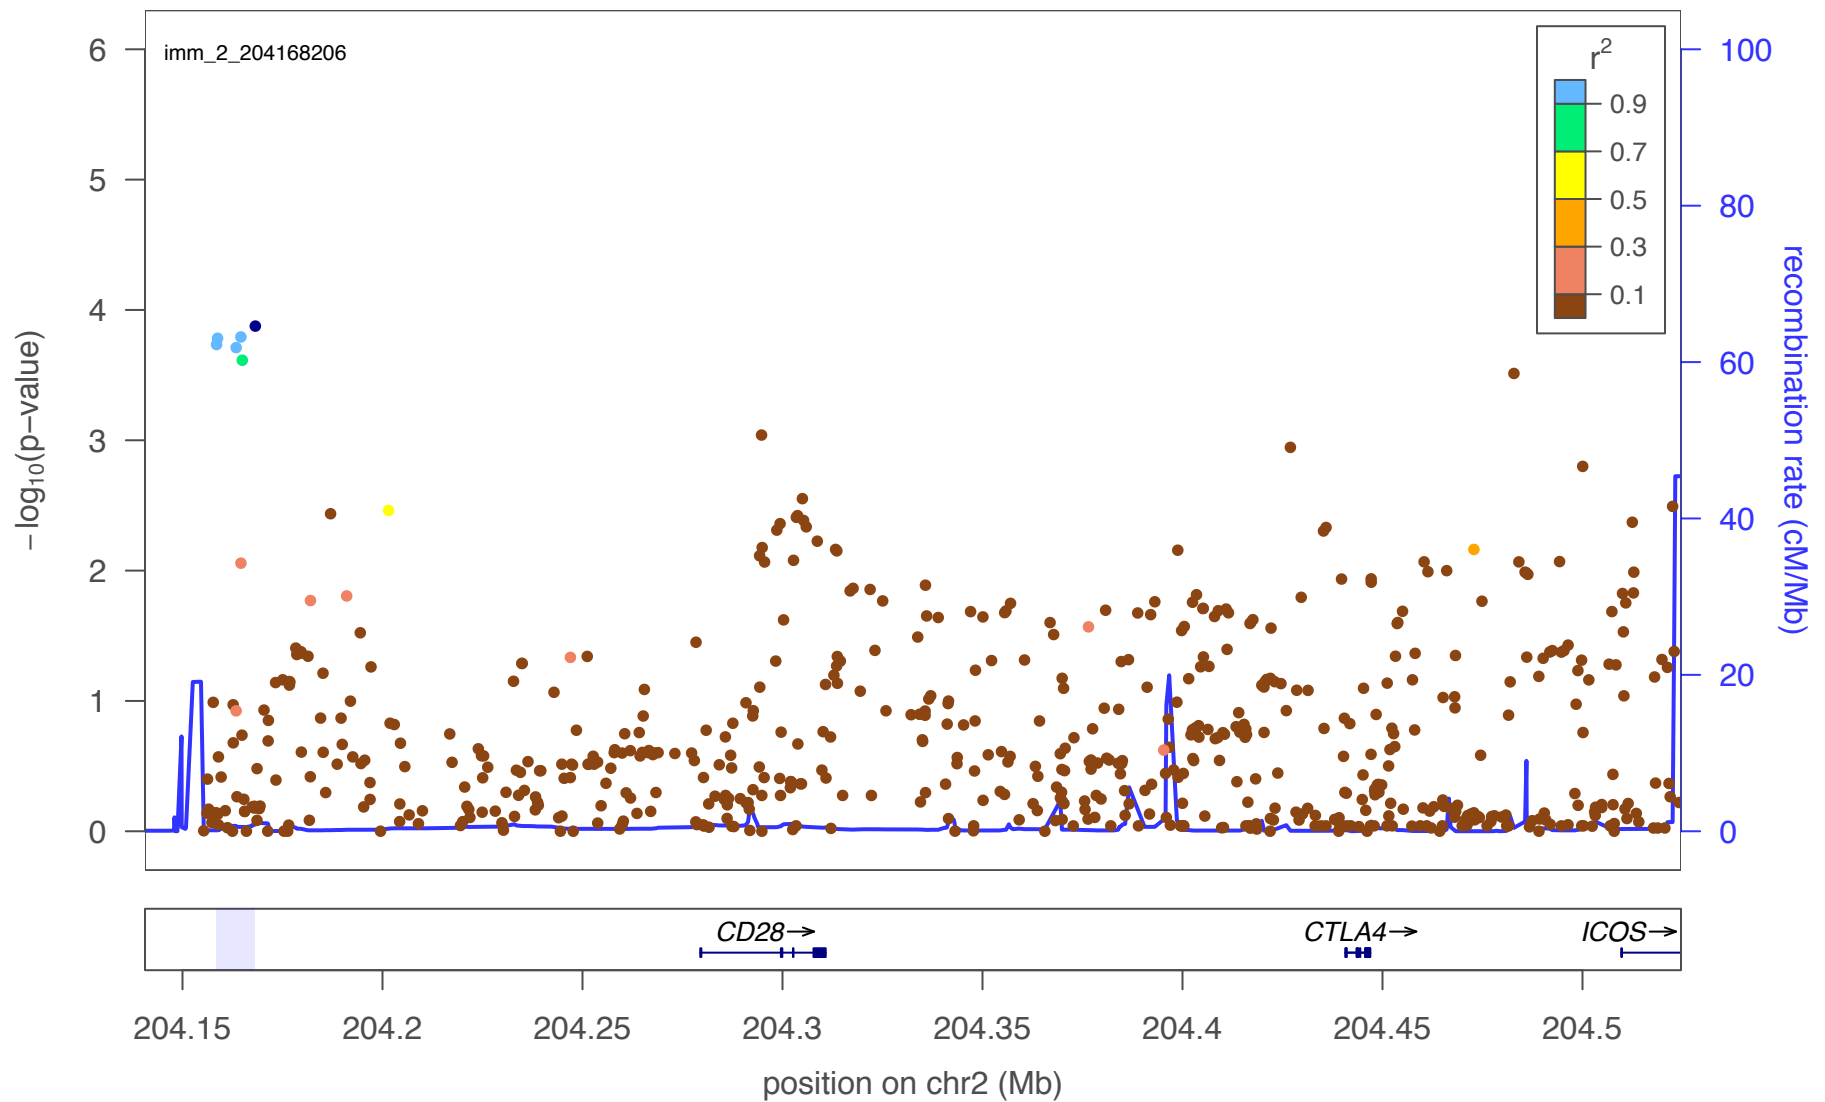

ImmunoChip | 

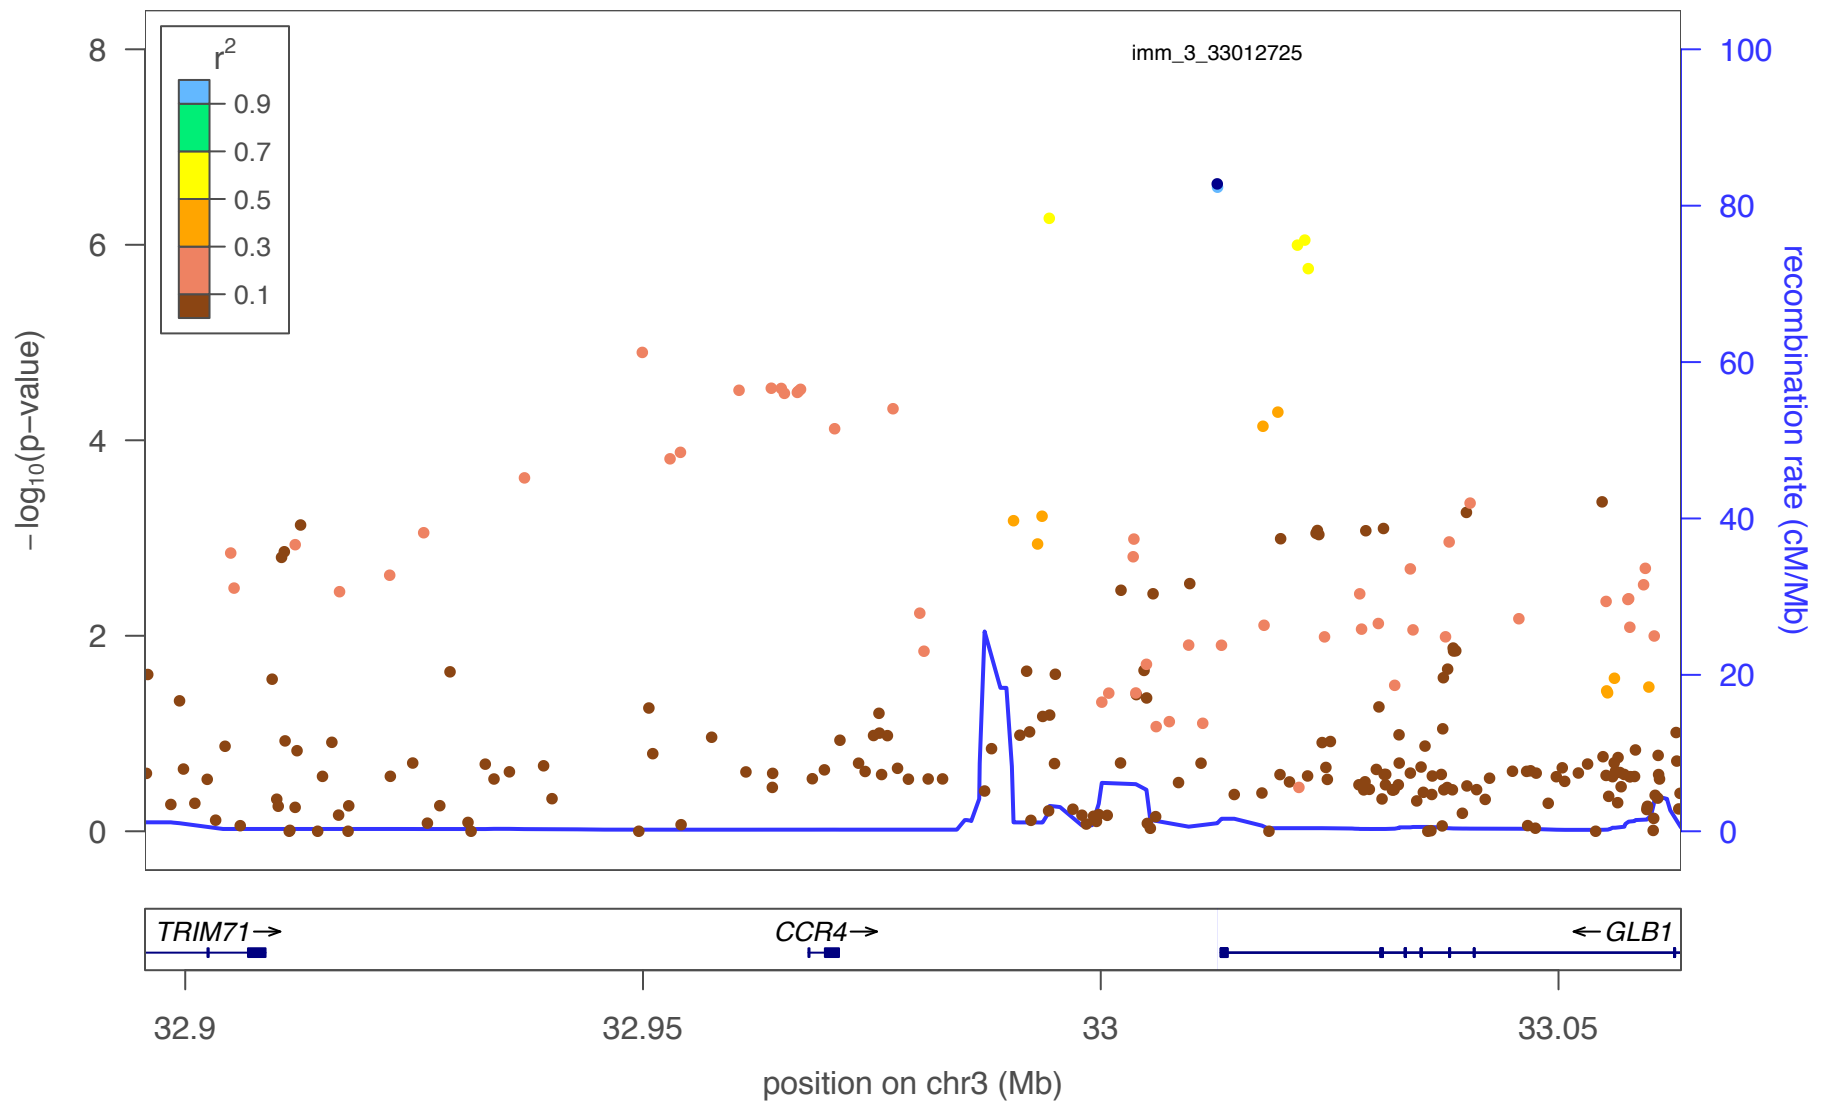

ImmunoChip 

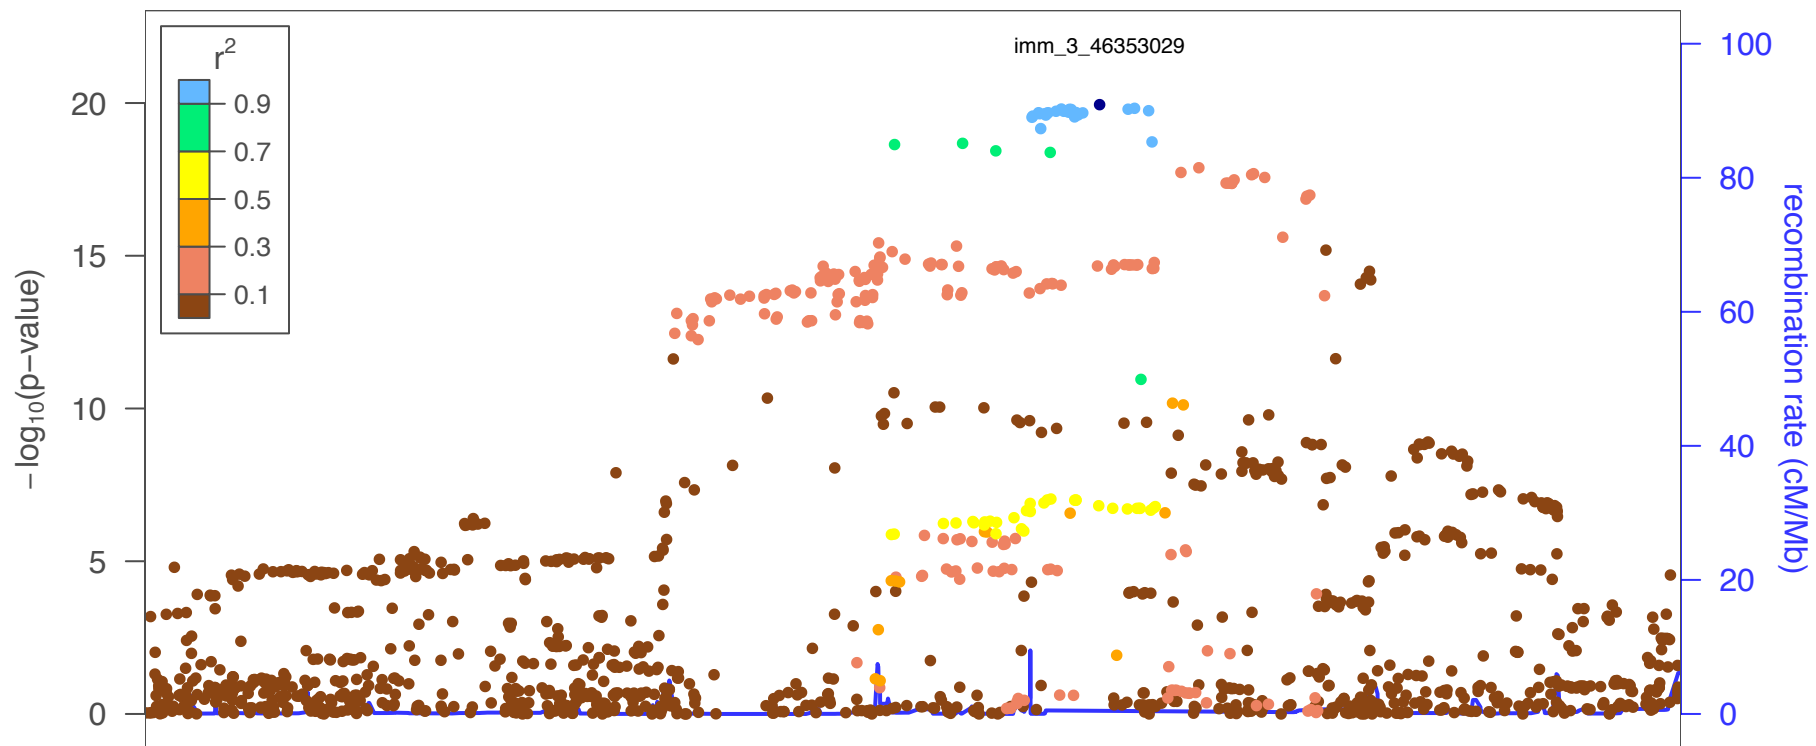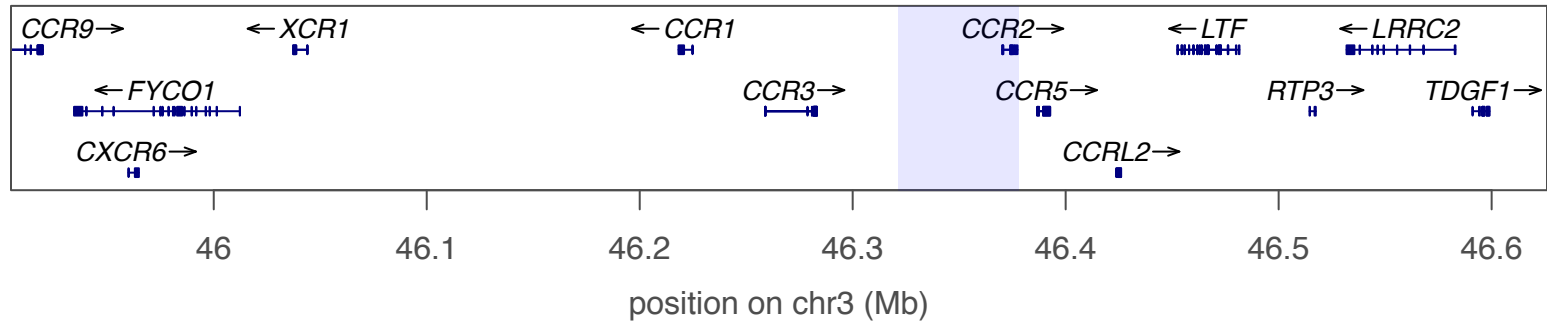



ImmunoChip 

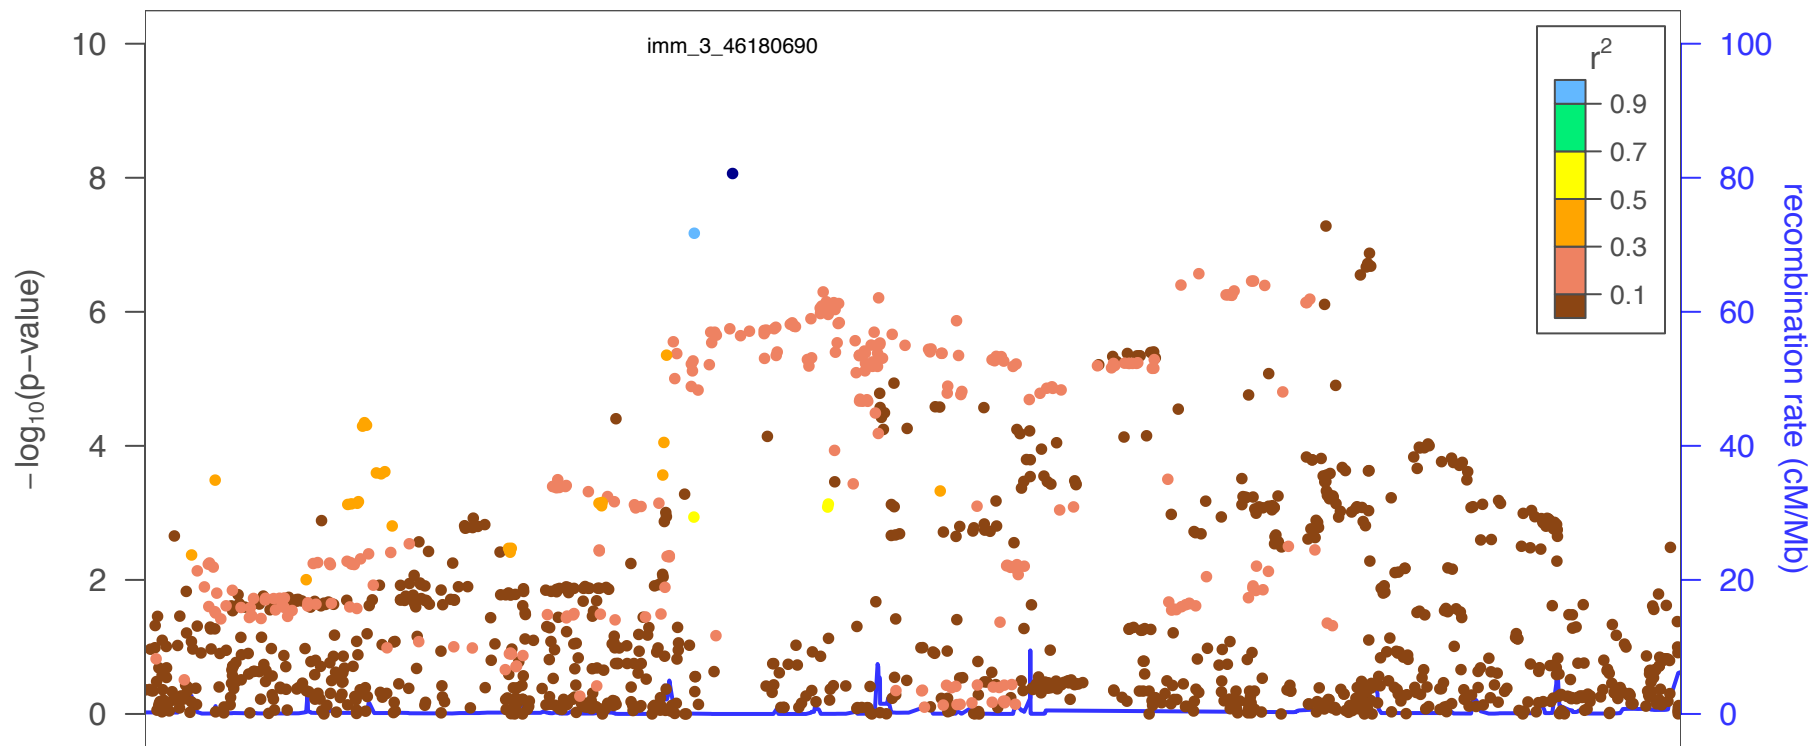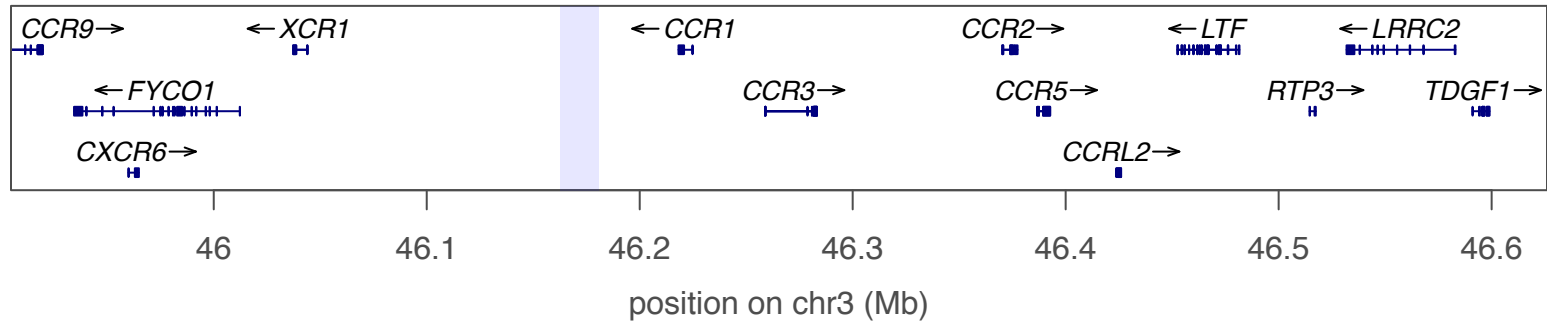

ImmunoChip

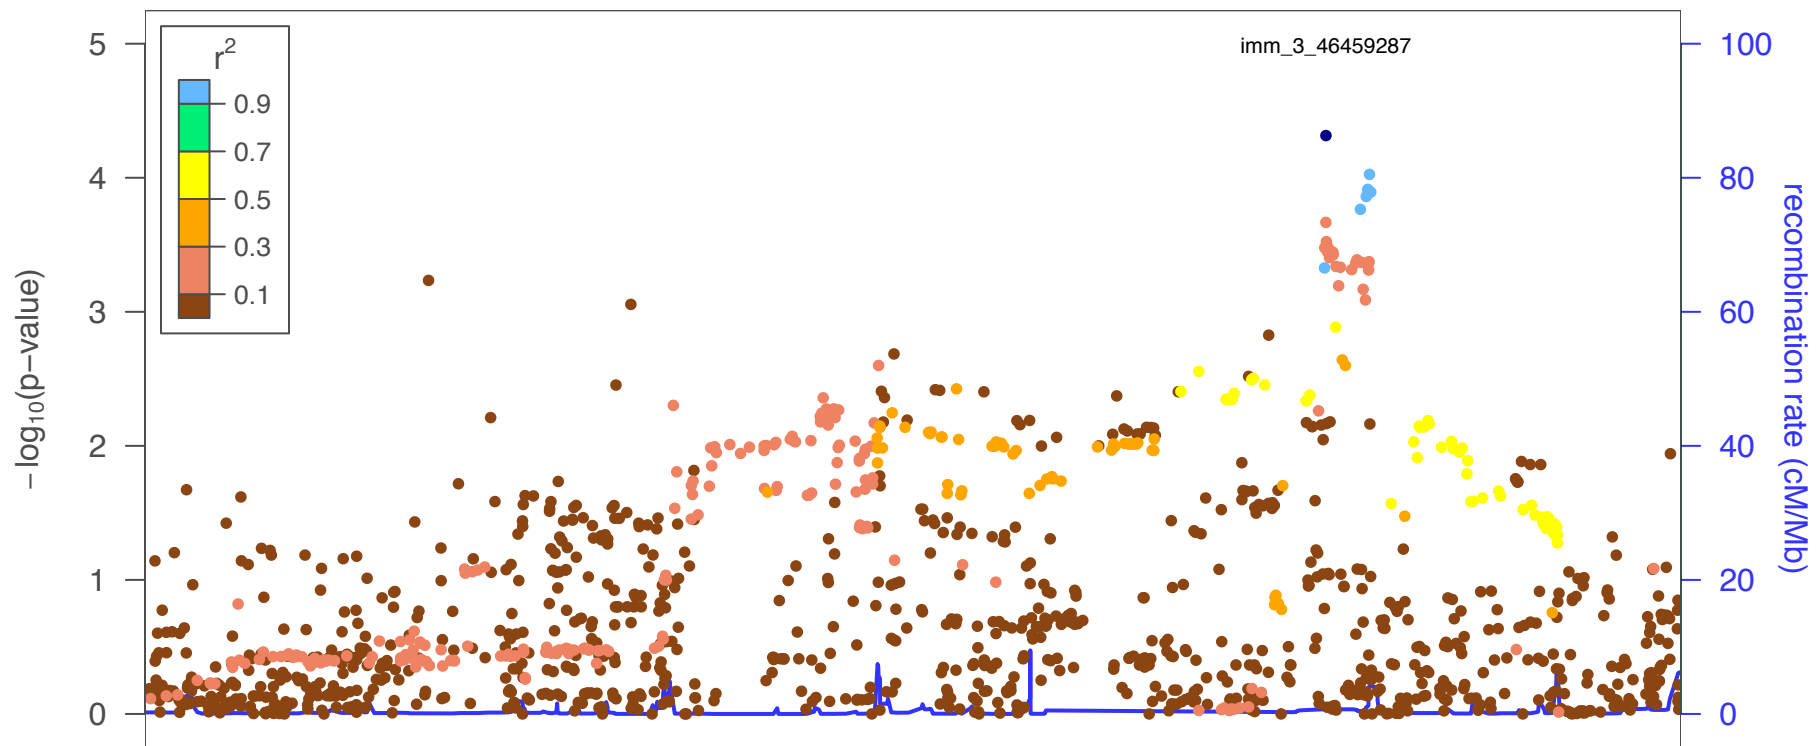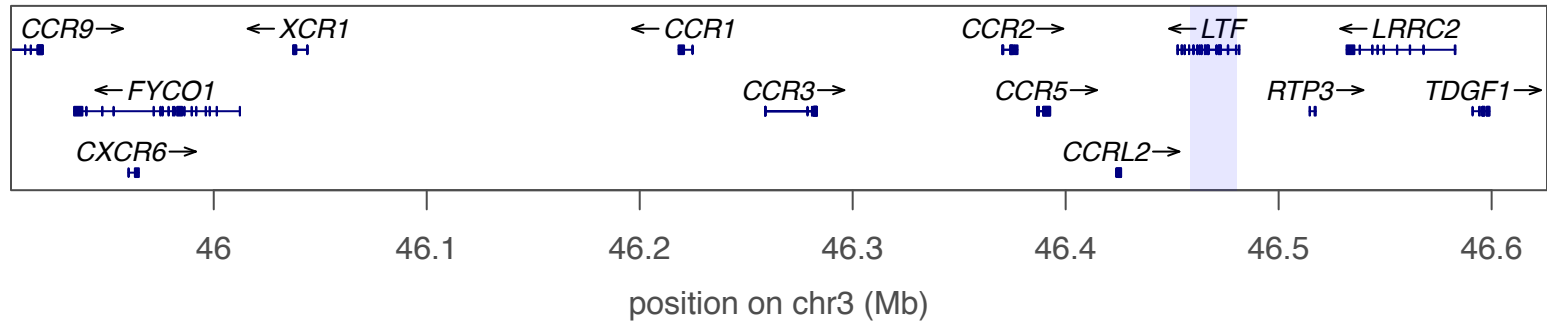

ImmunoChip |

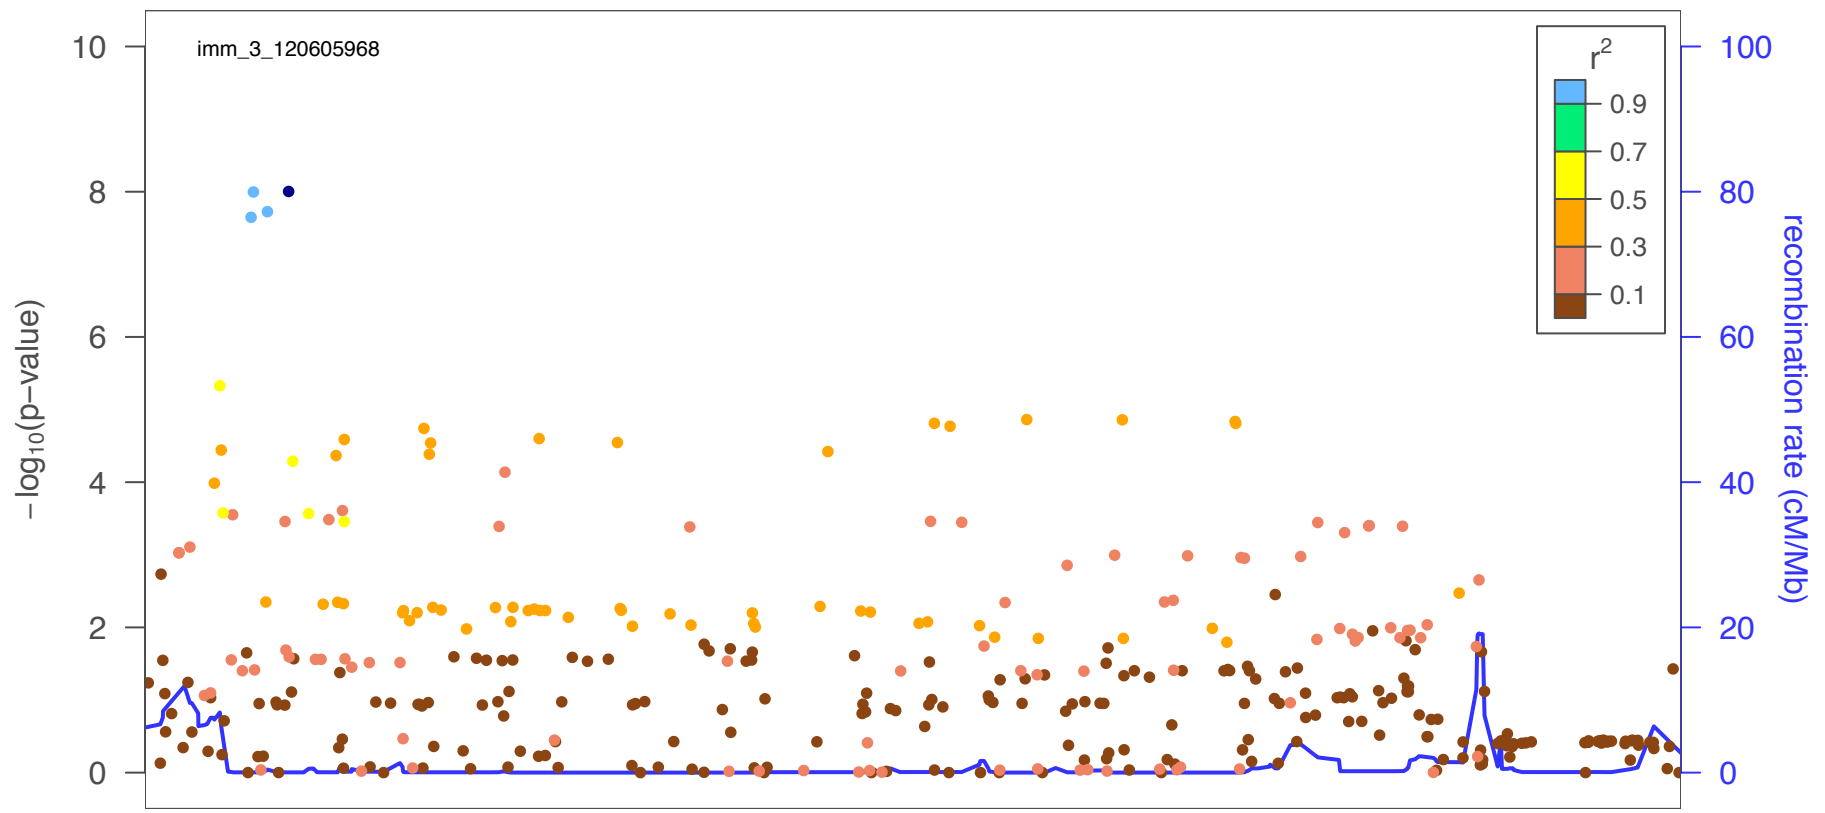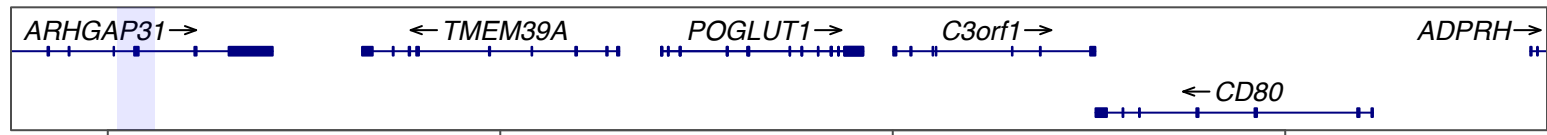

120.6

120.65

120.7

120.75

position on chr3 (Mb)

ImmunoChip | 

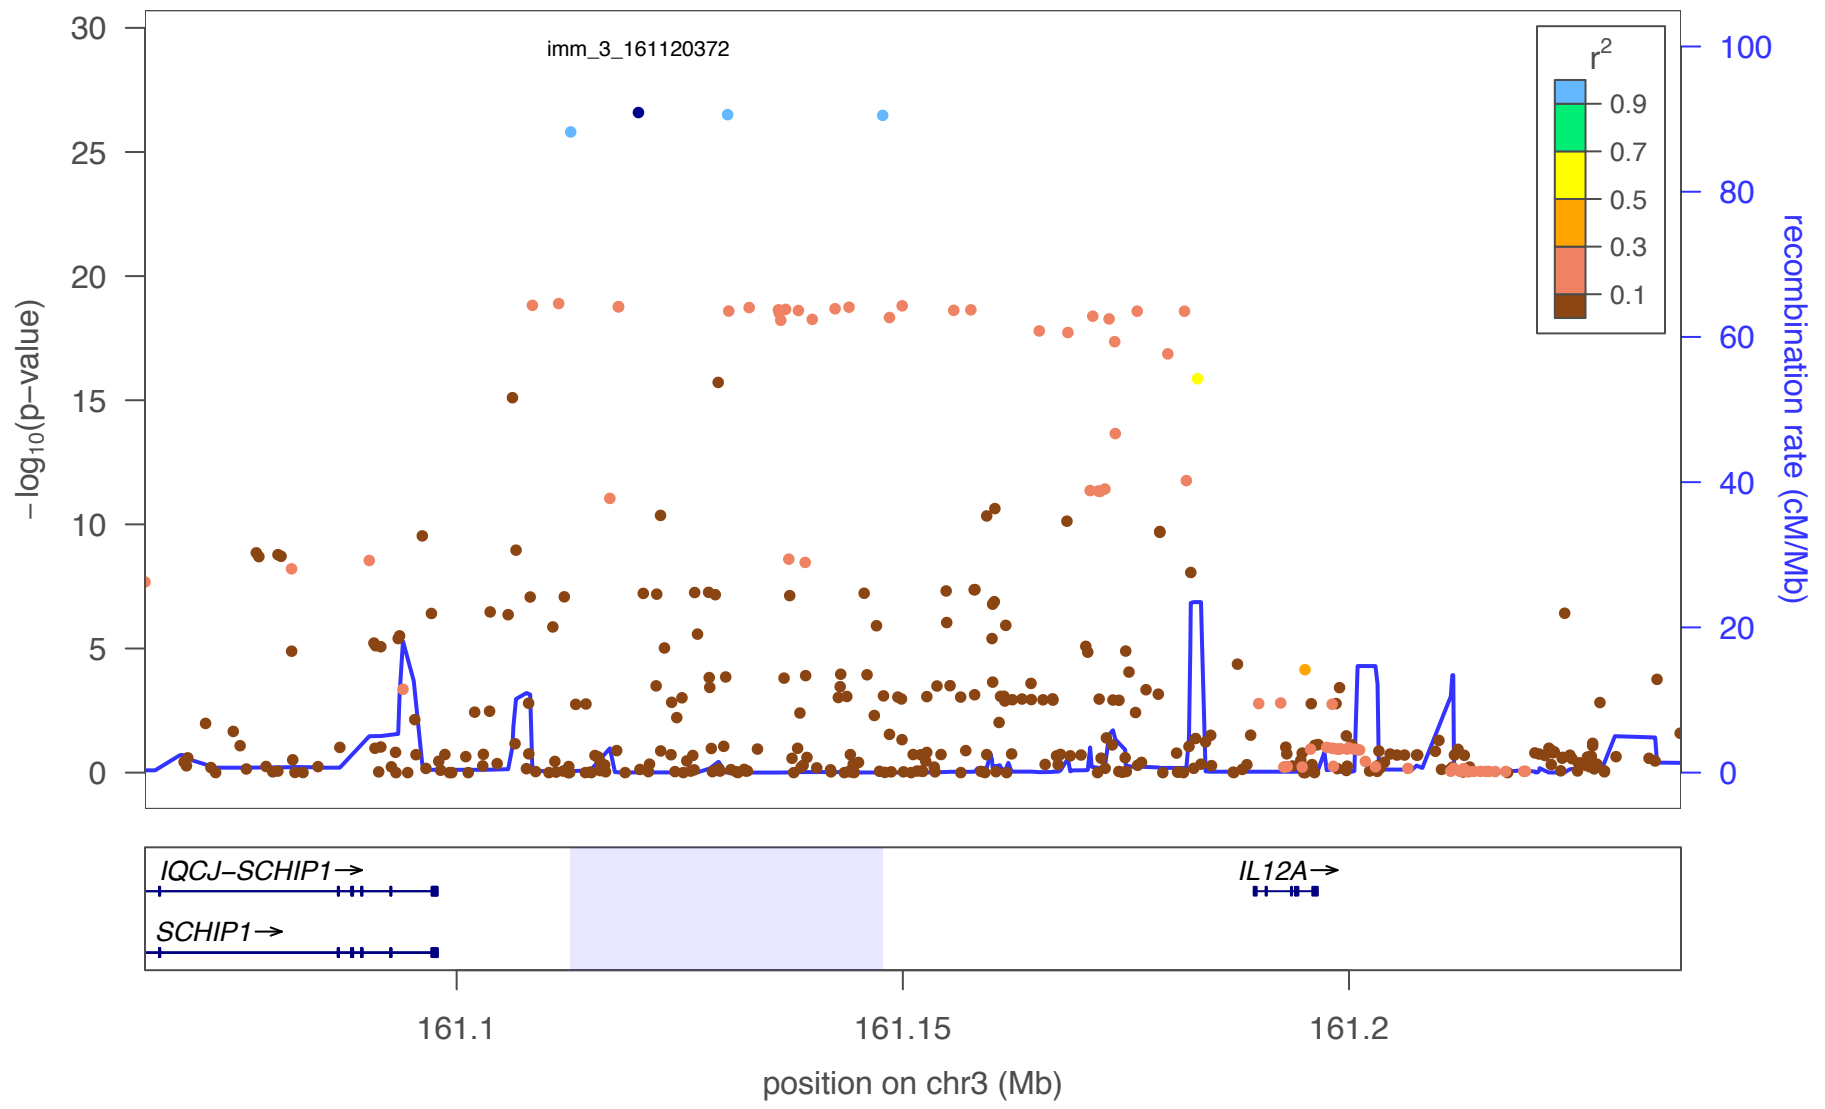

ImmunoChip | 

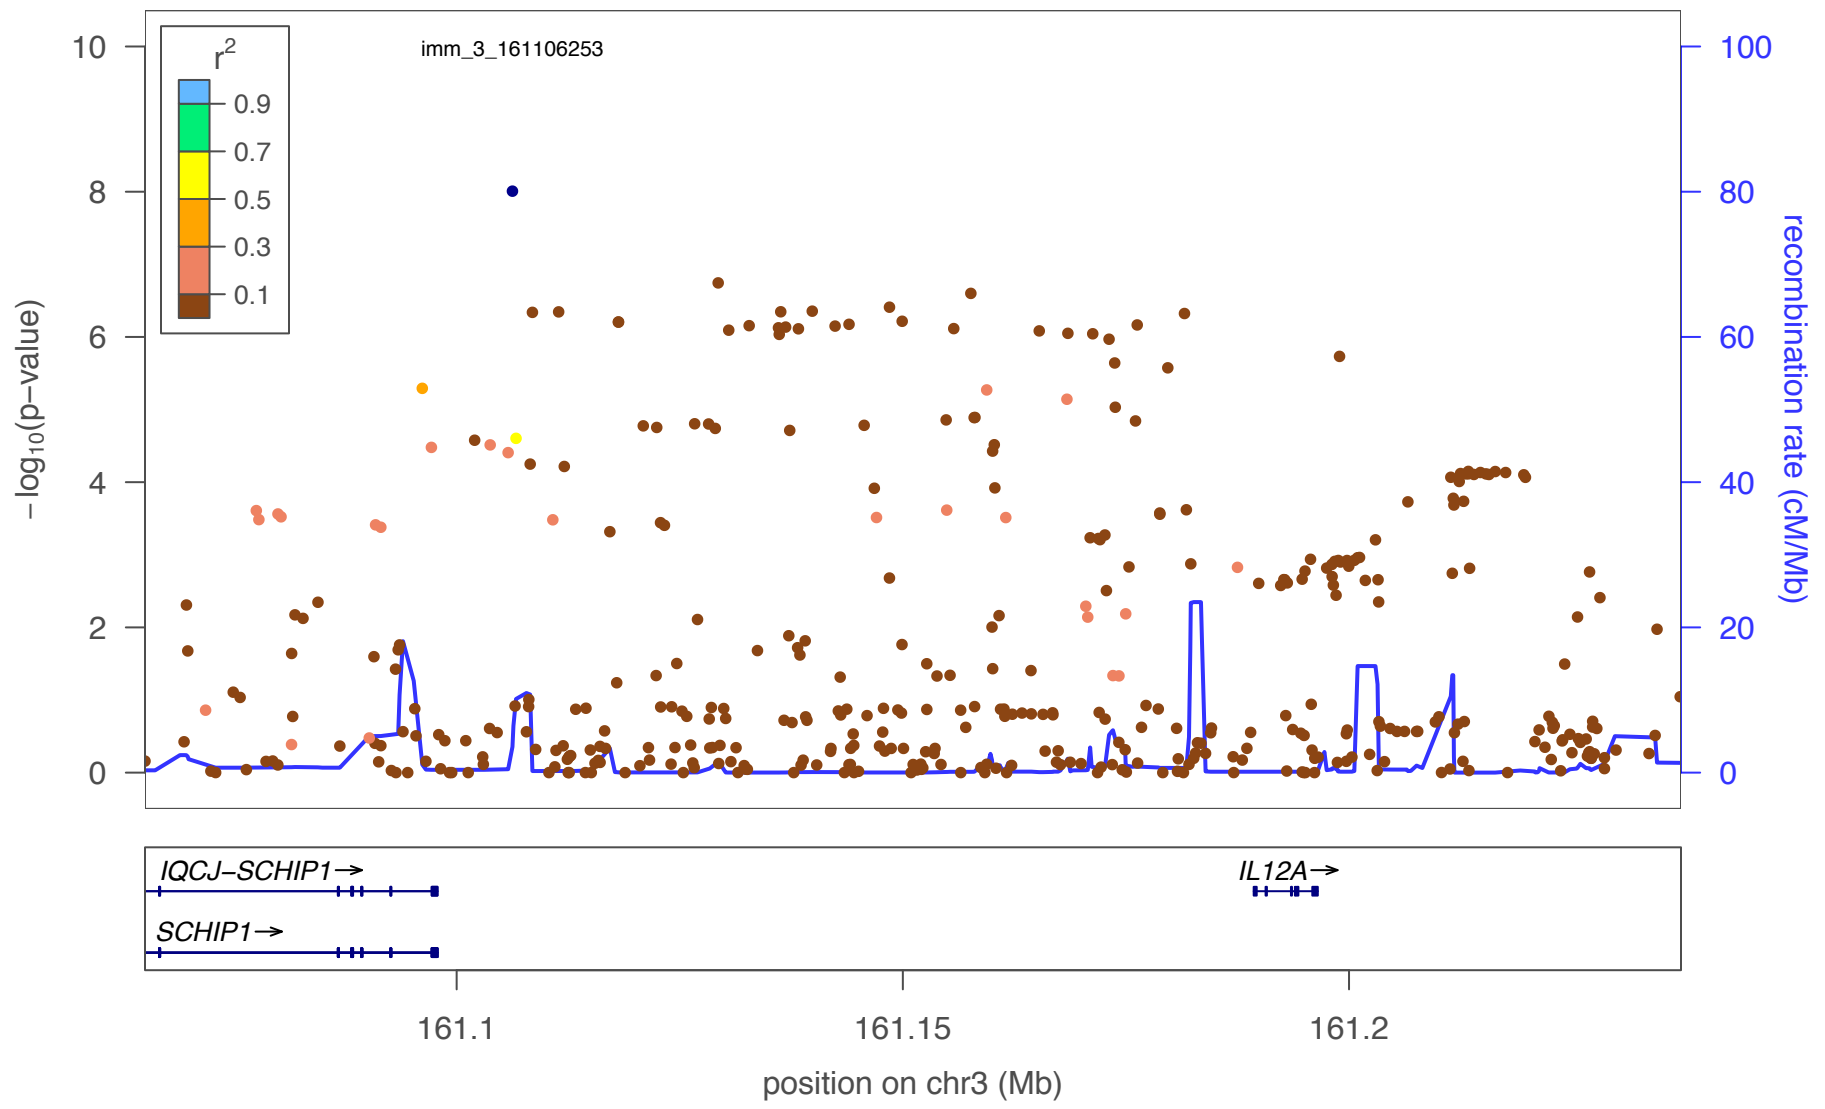

ImmunoChip | 

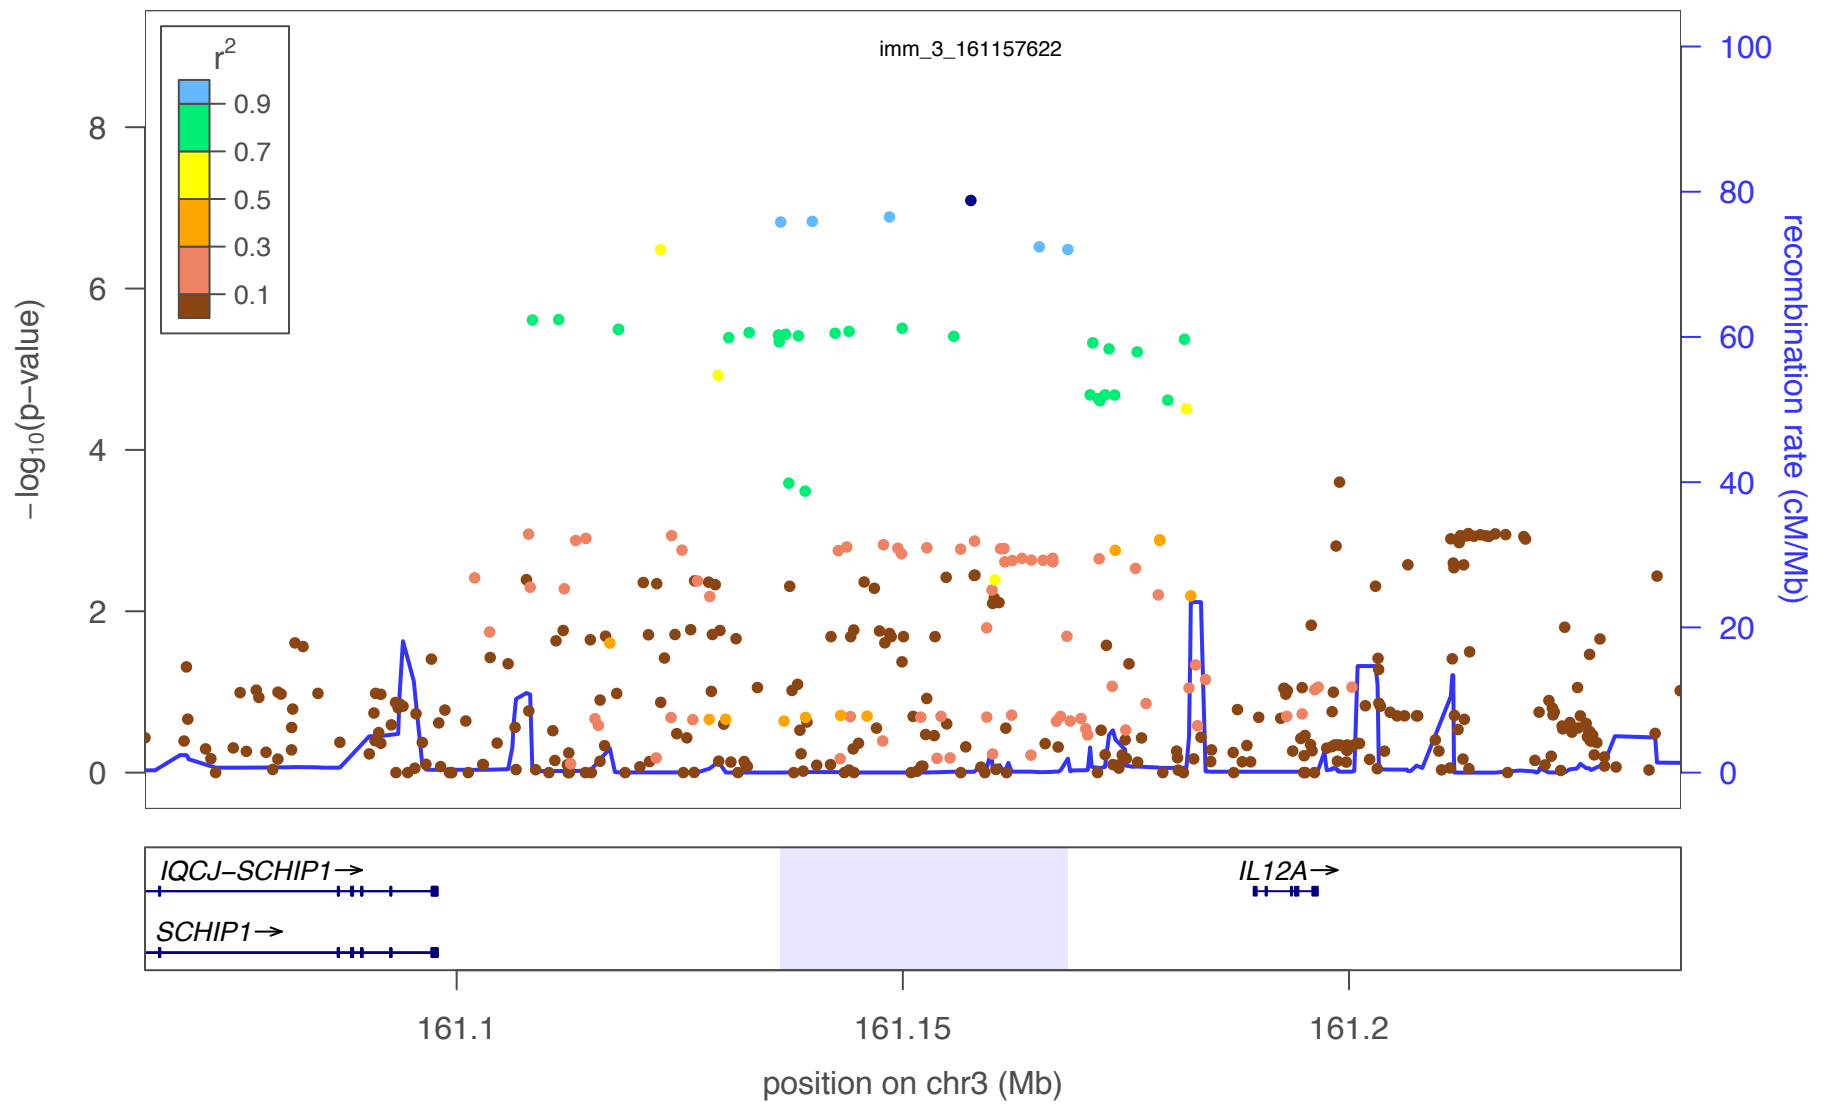

ImmunoChip

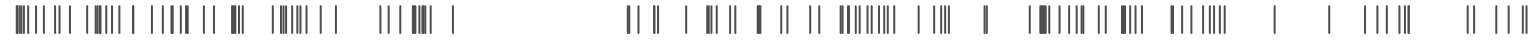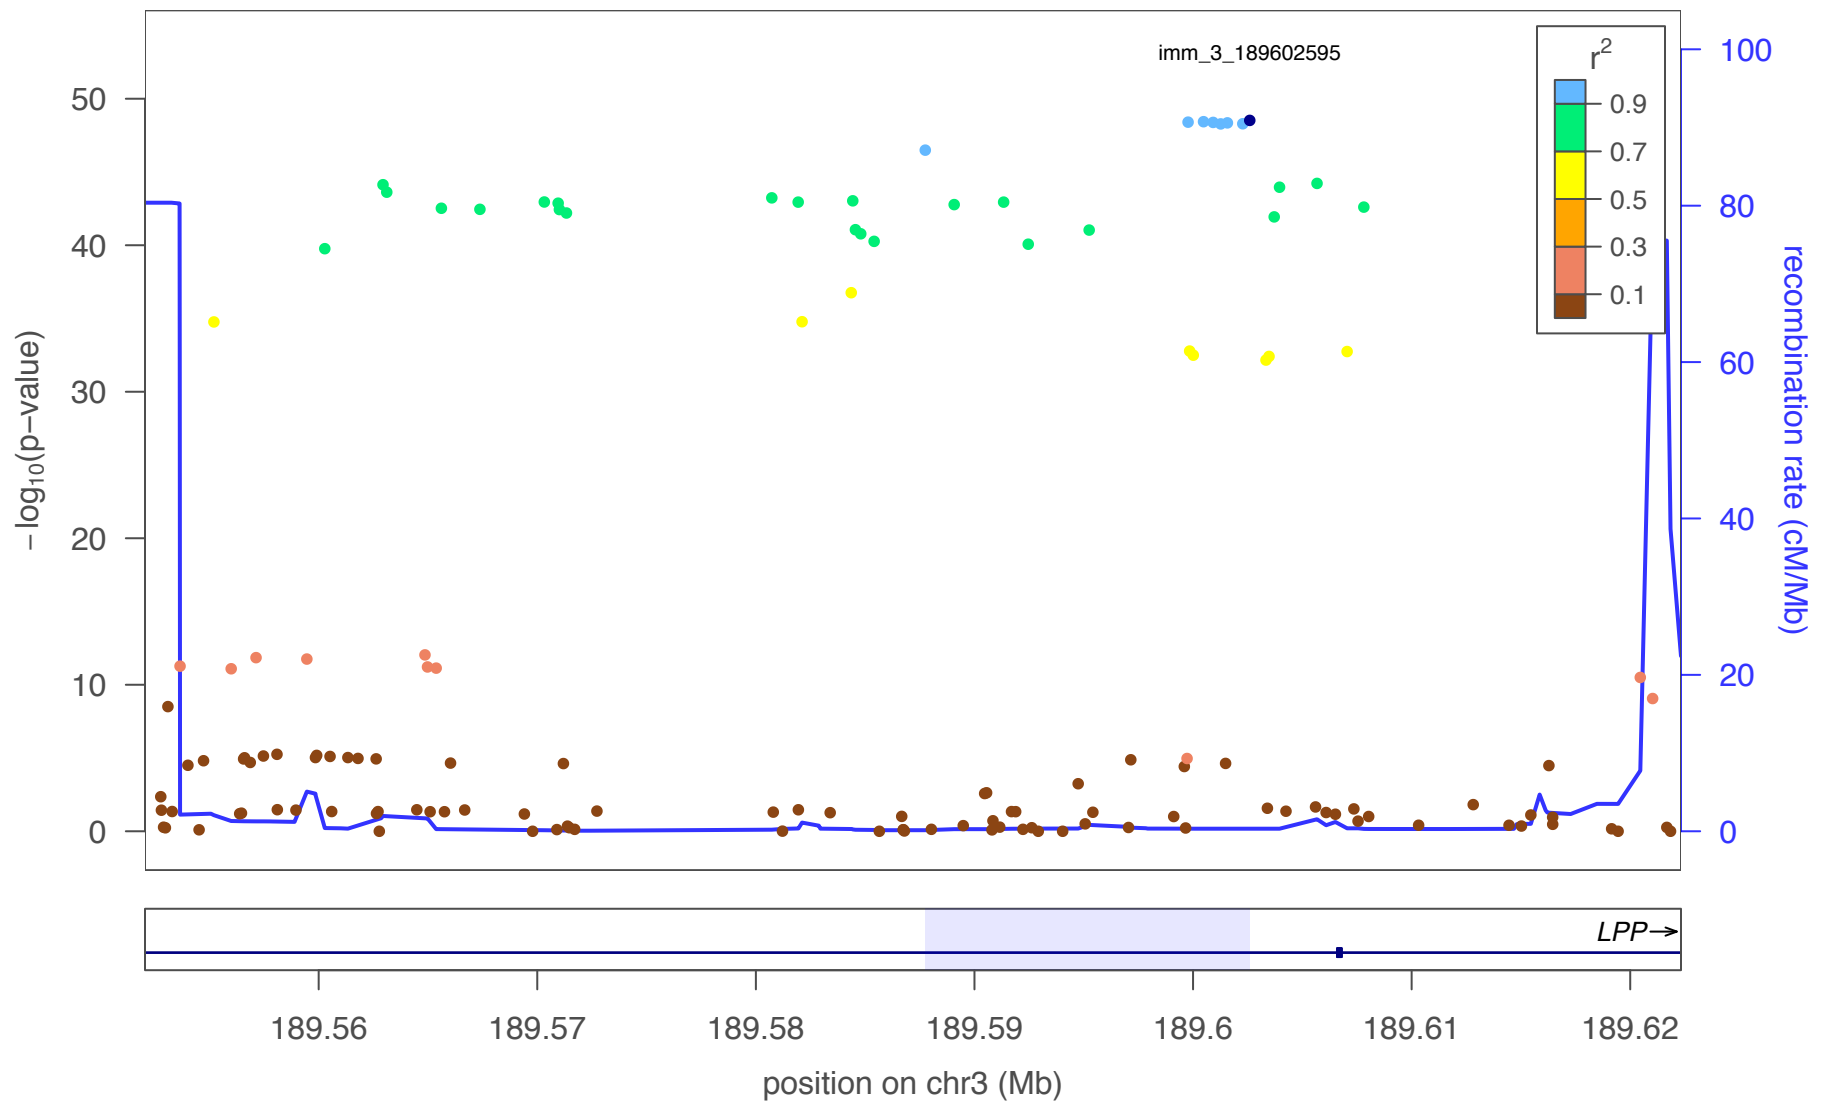

ImmunoChip 

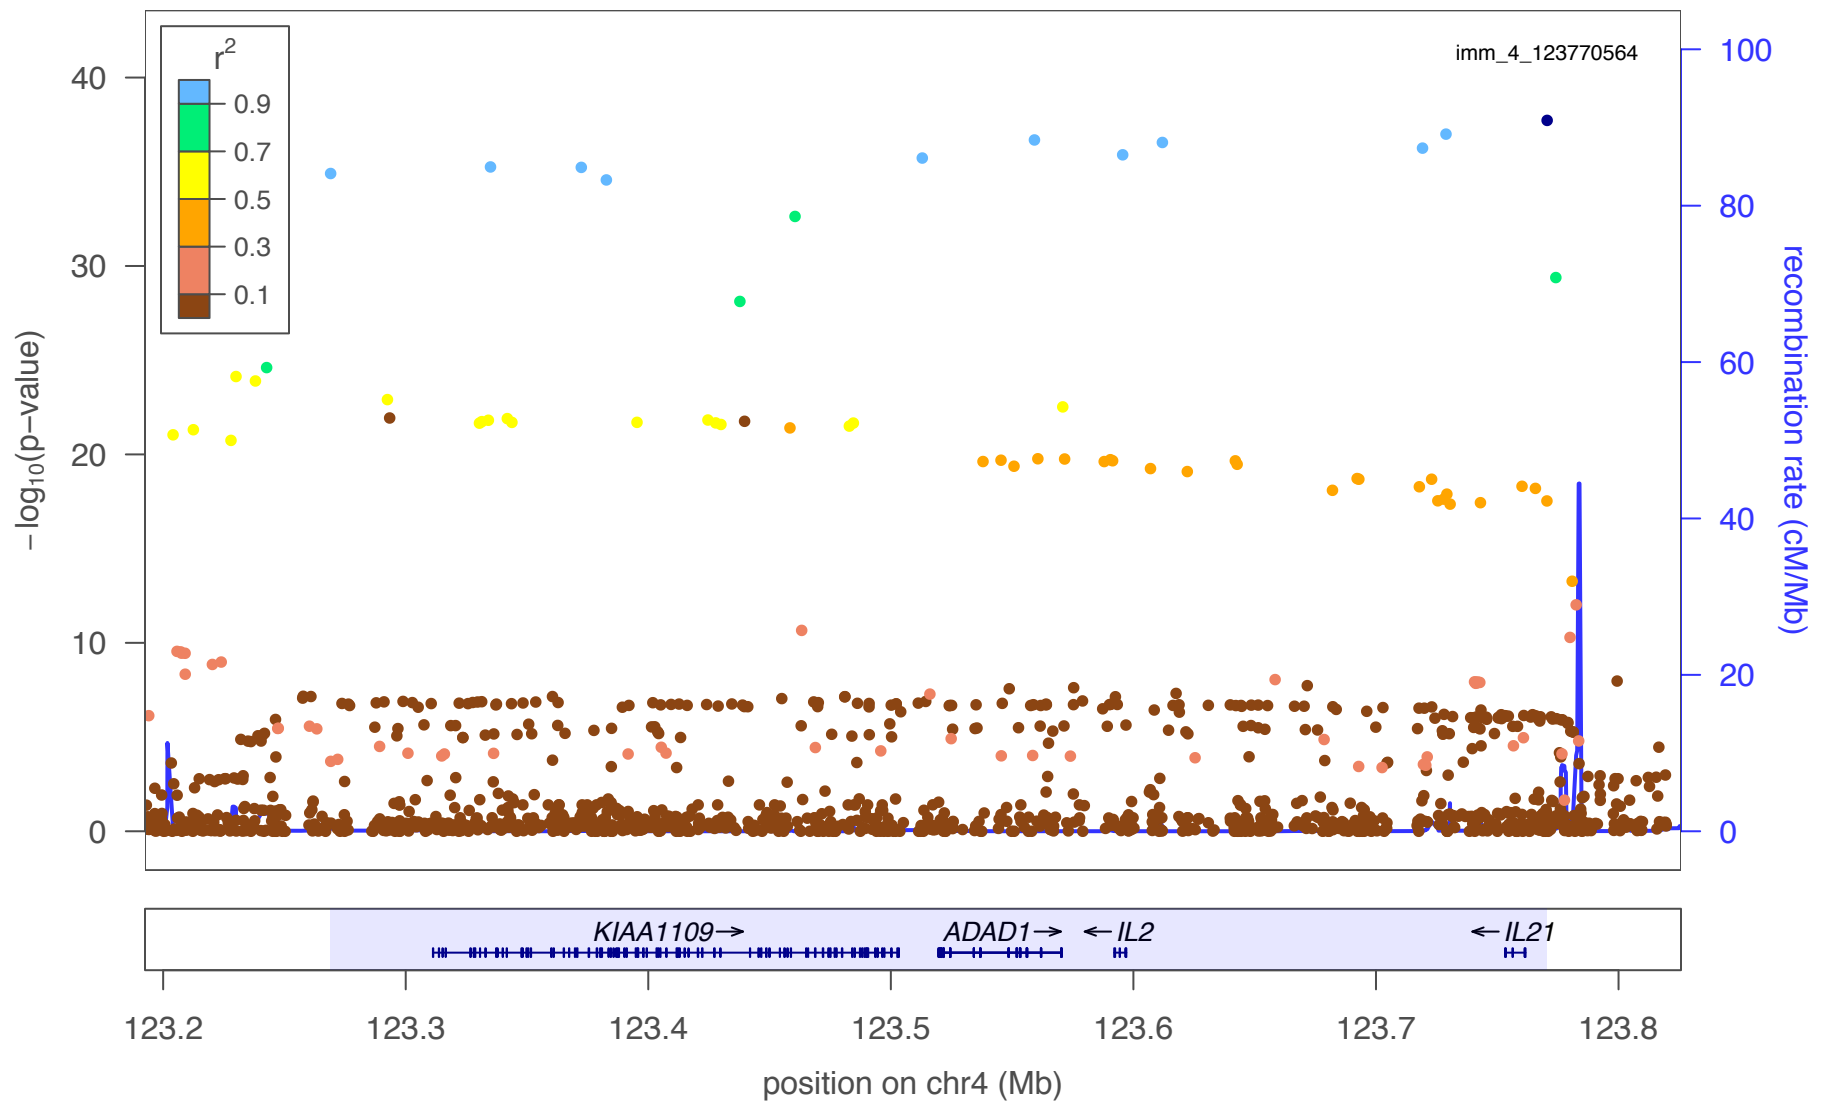



ImmunoChip

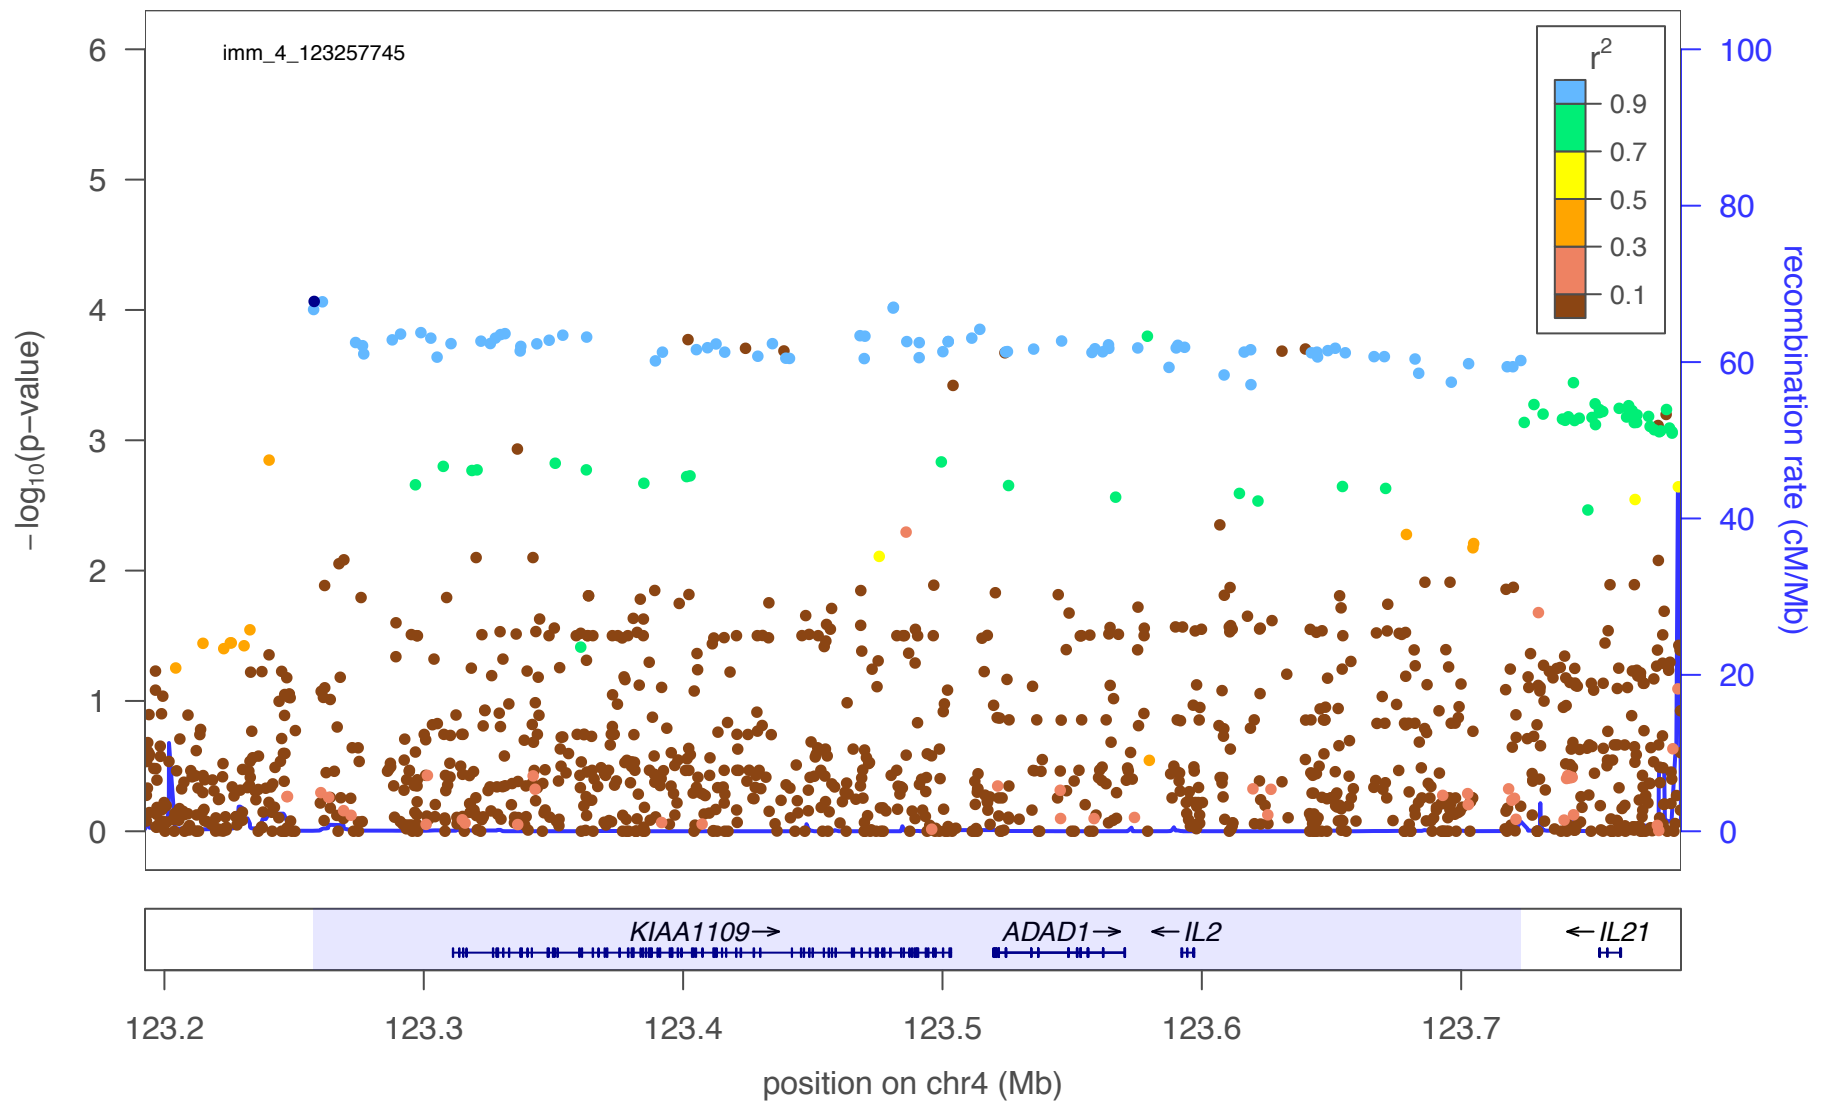

ImmunoChip

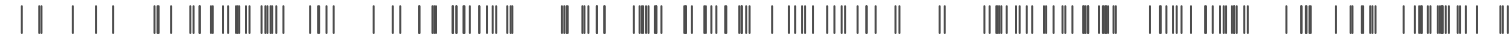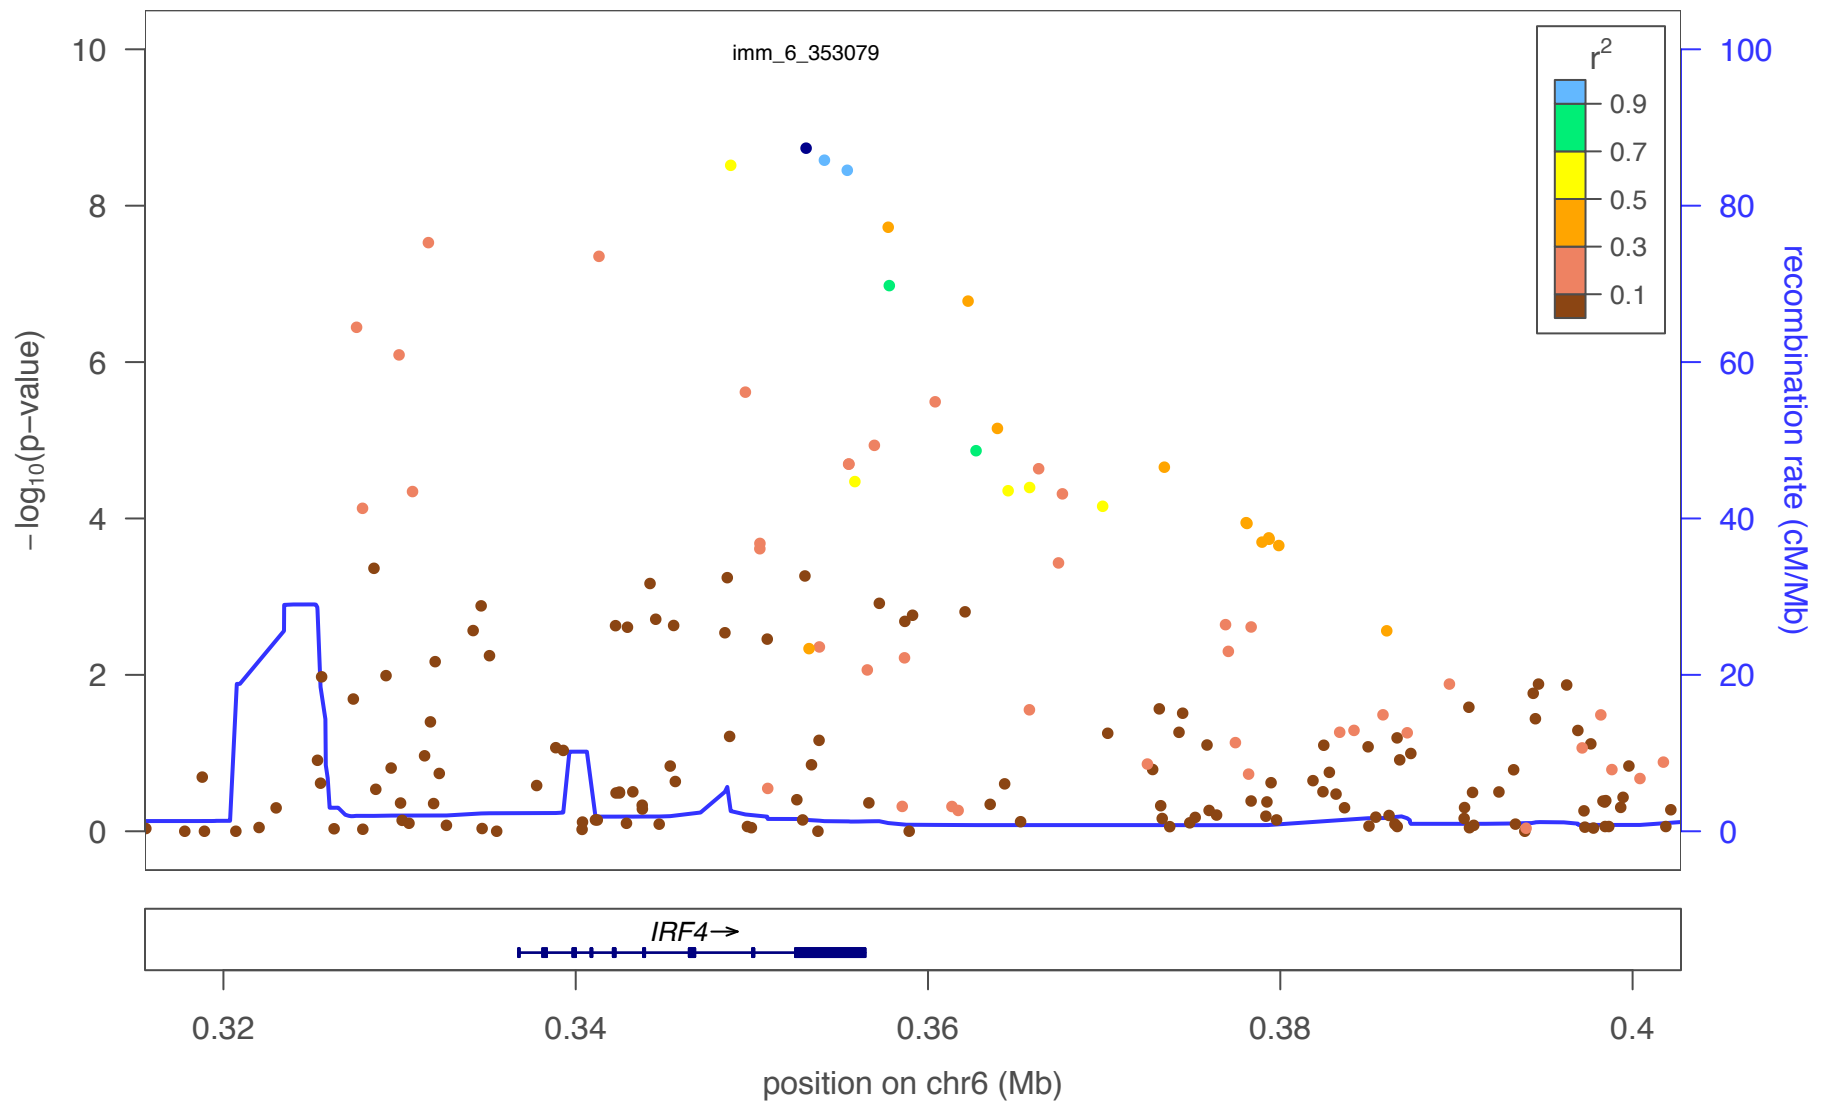



ImmunoChip

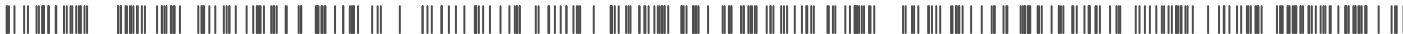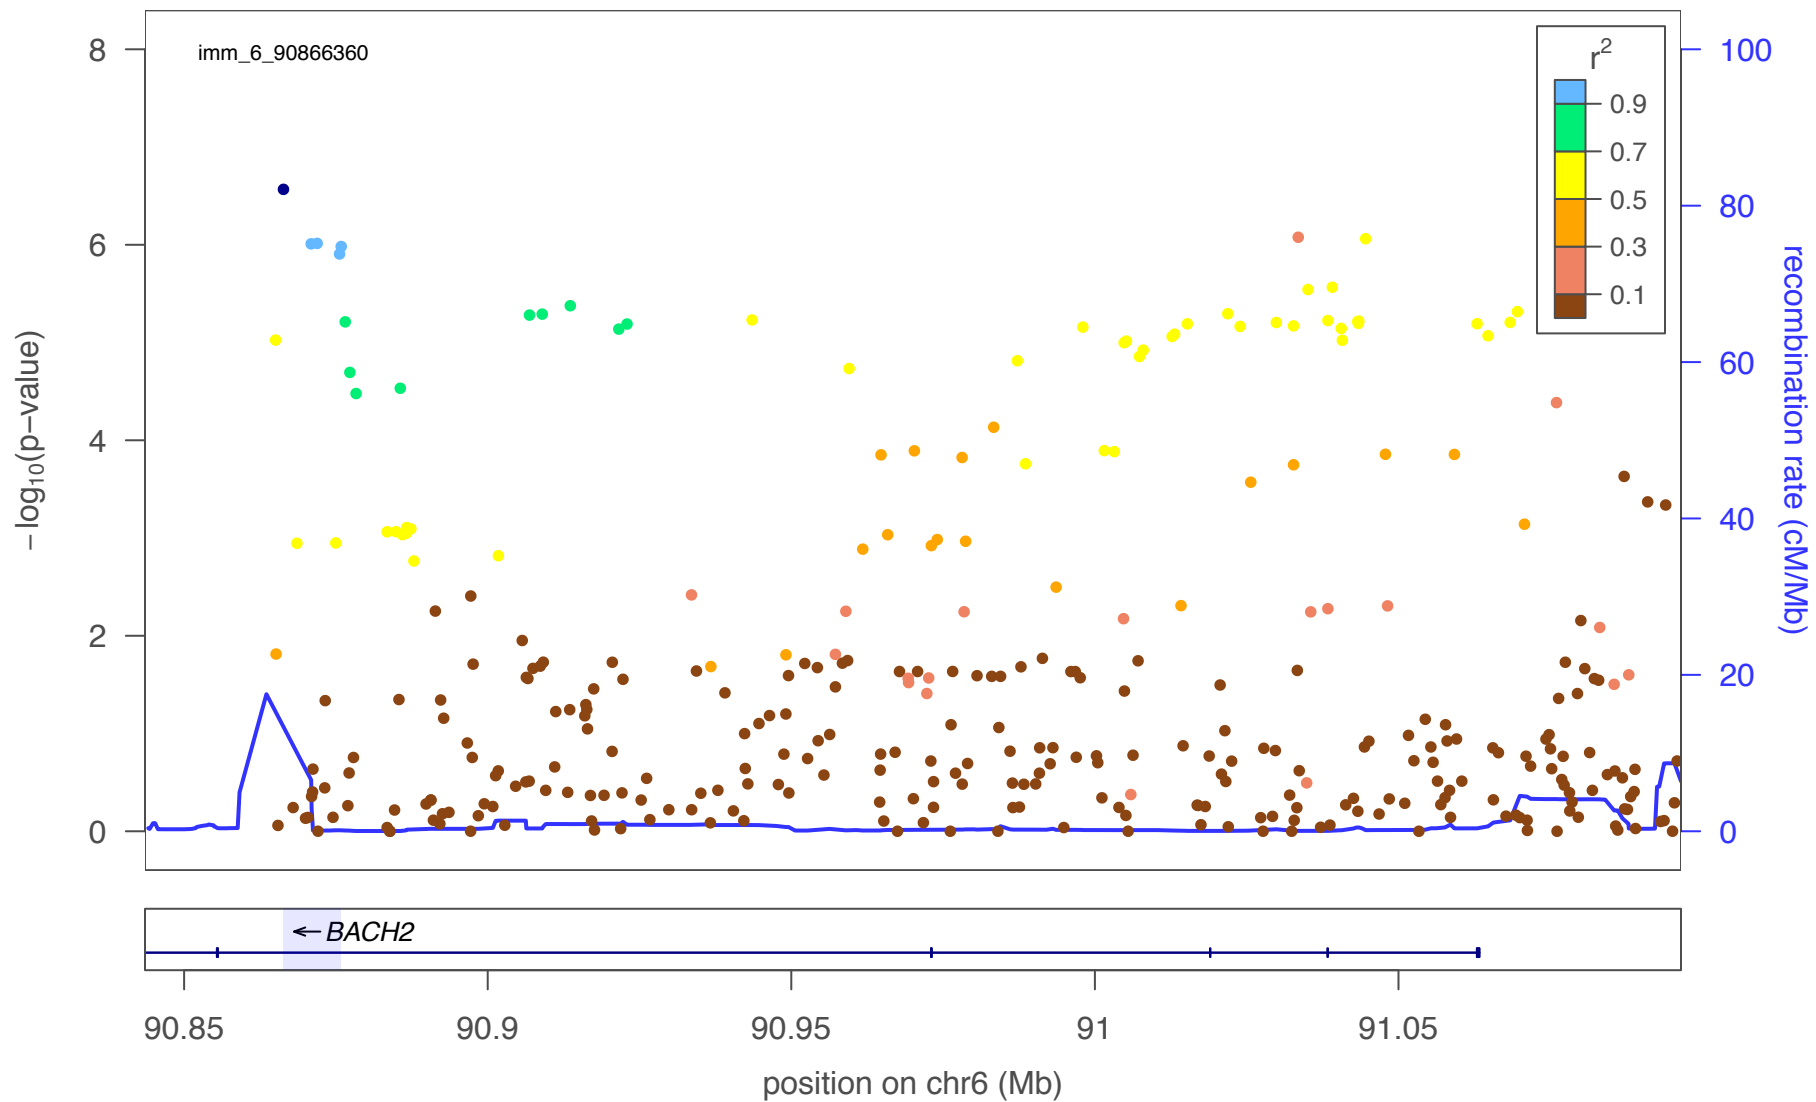

ImmunoChip 

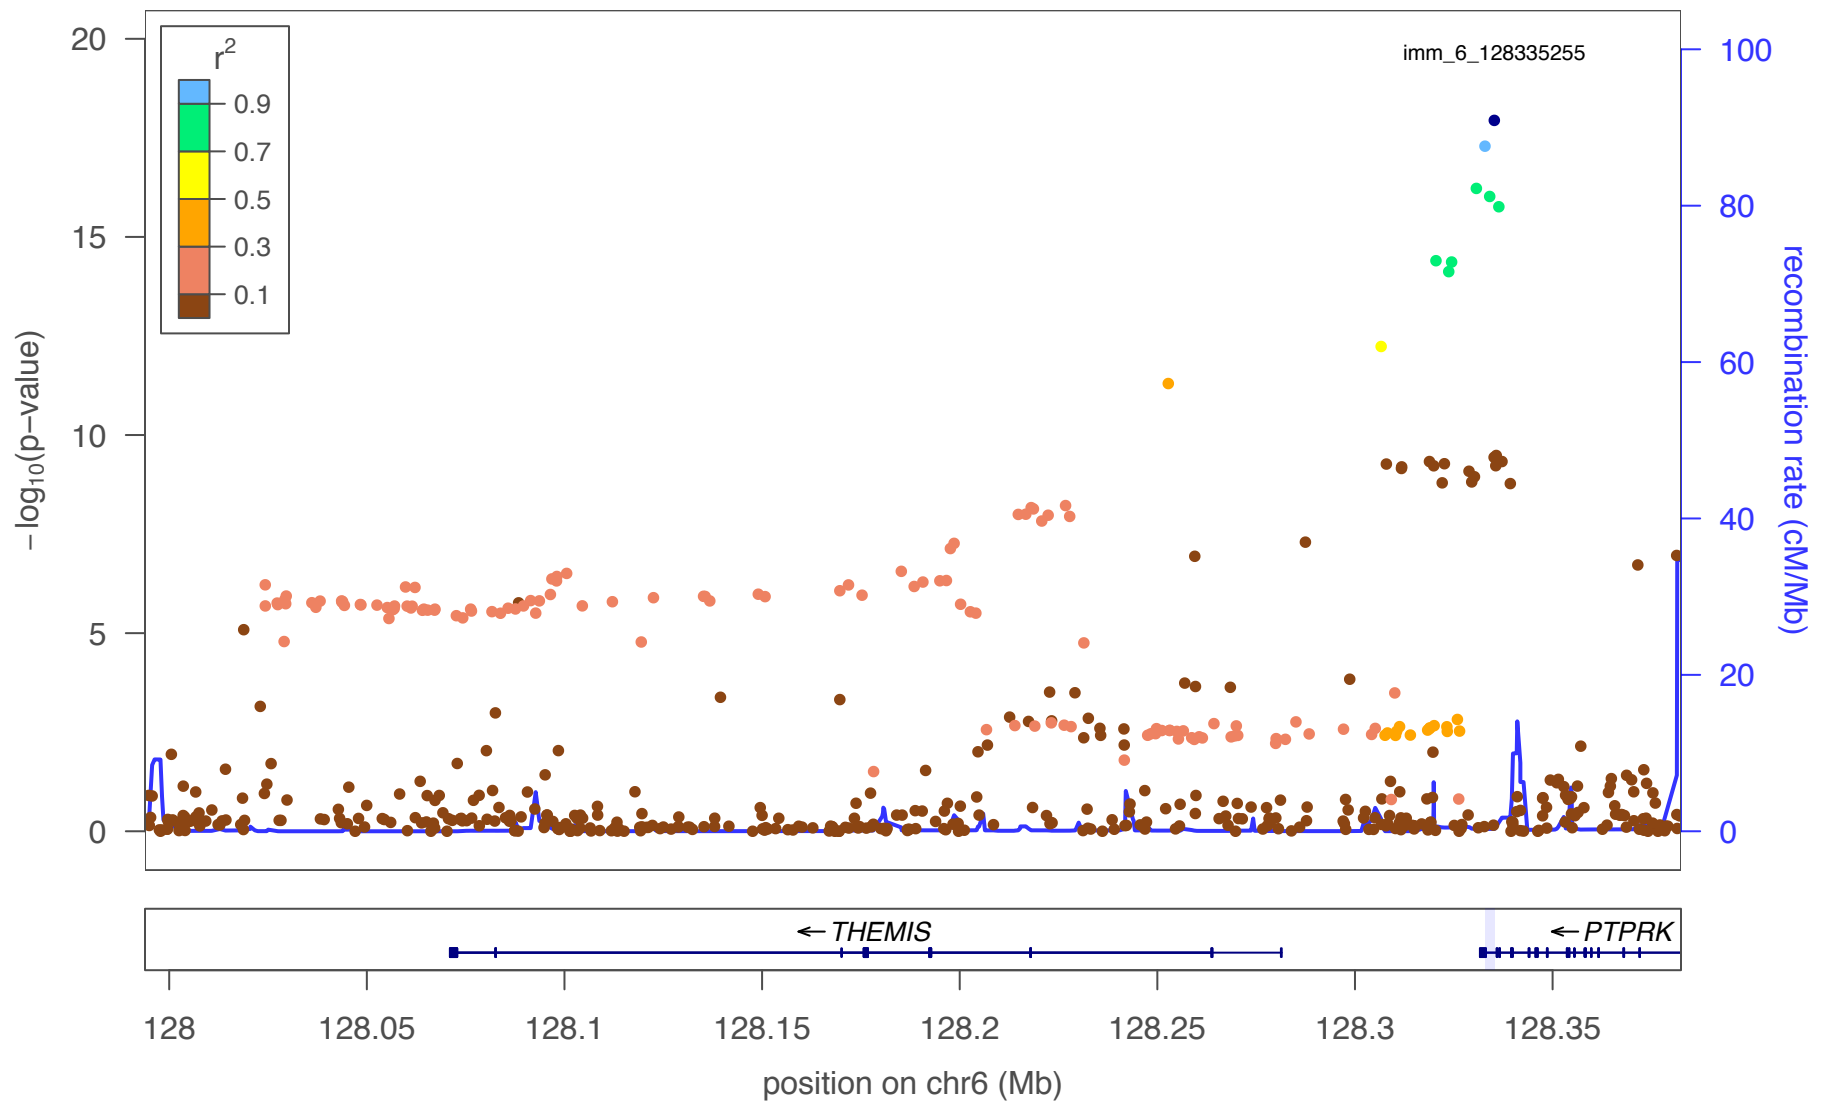

ImmunoChip 

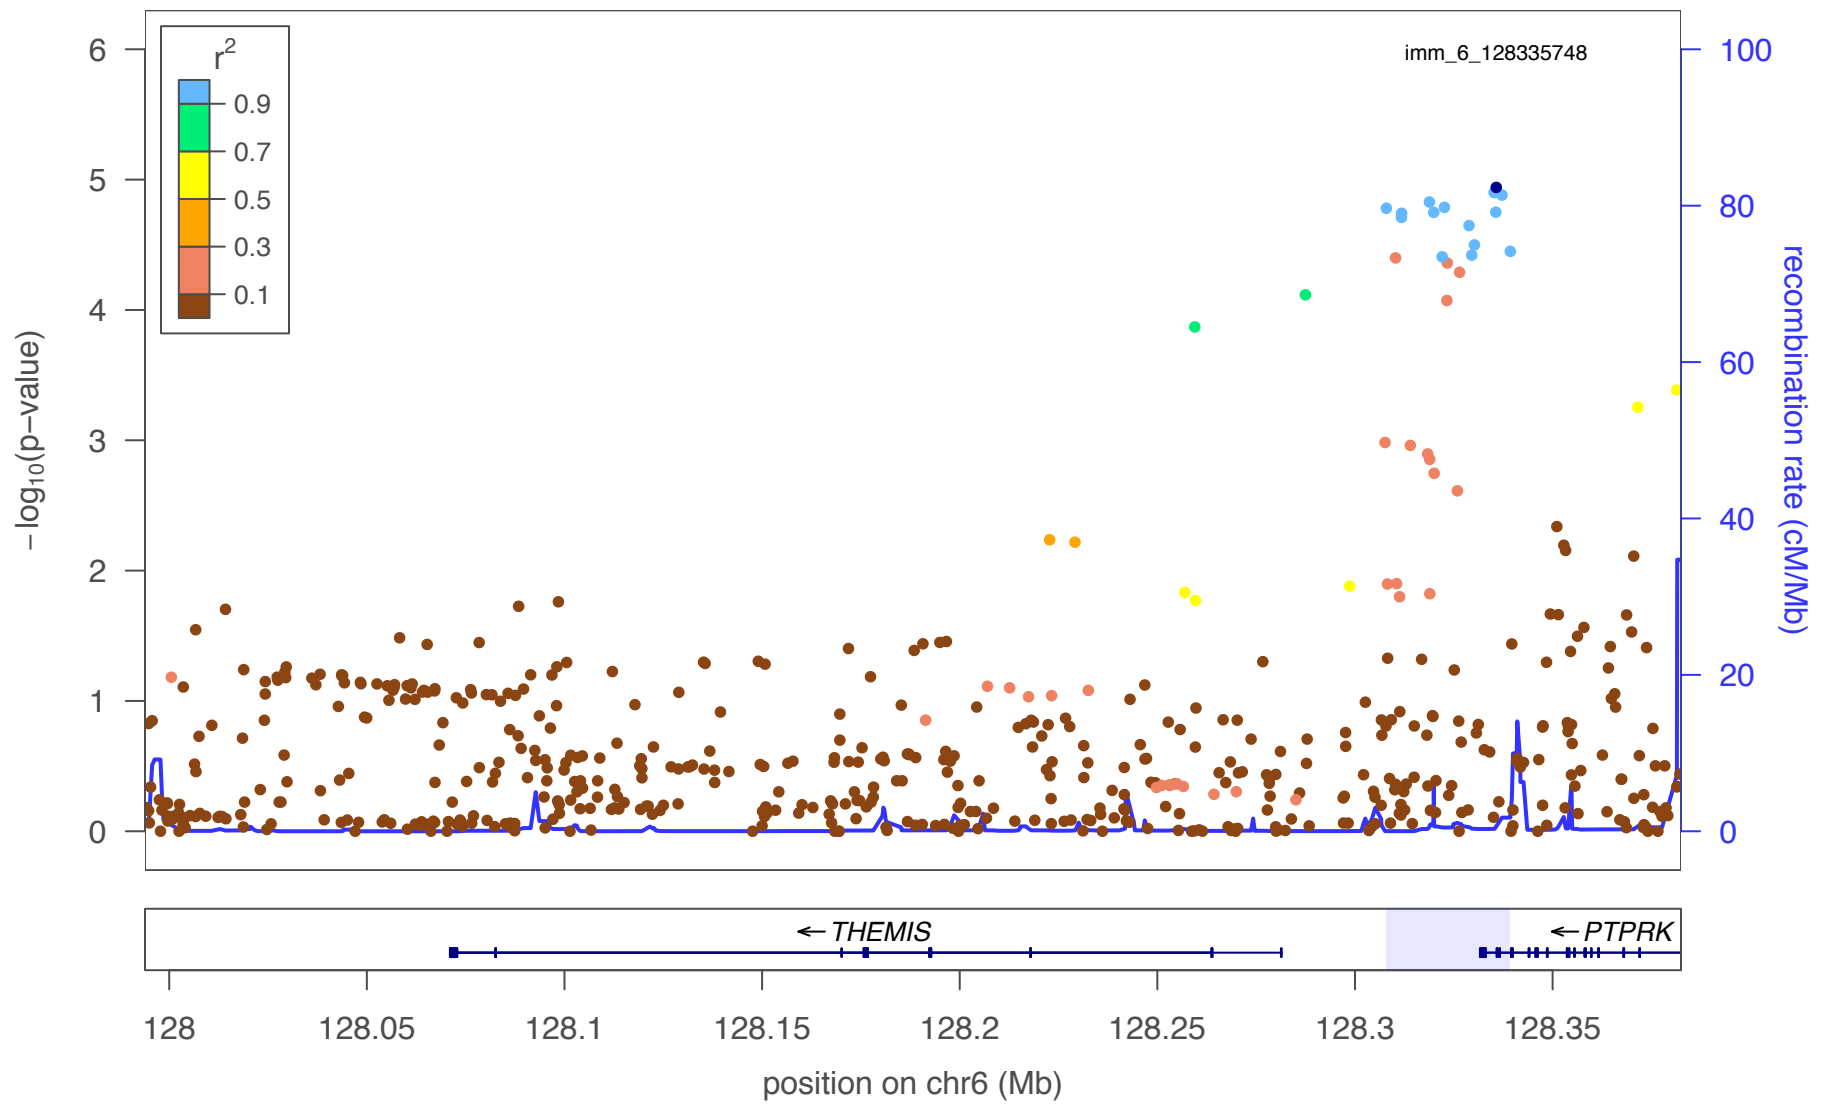

ImmunoChip

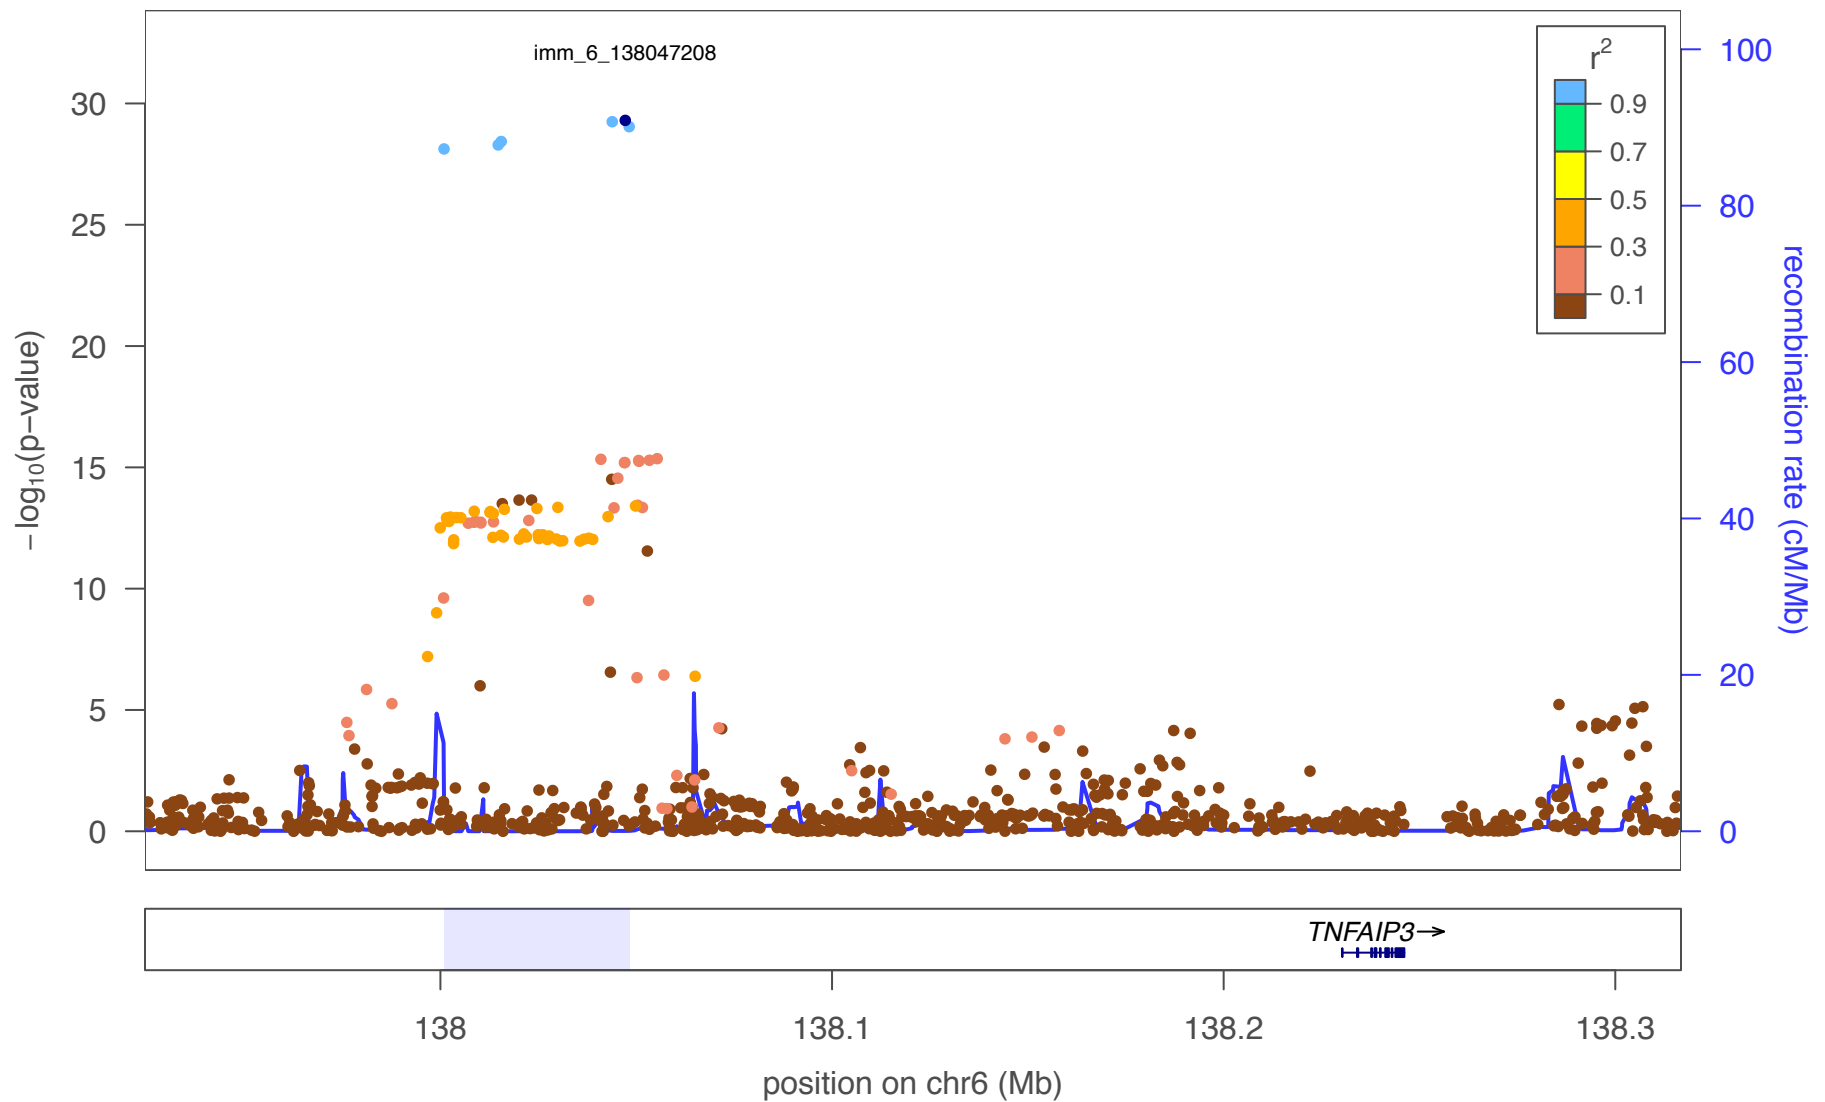

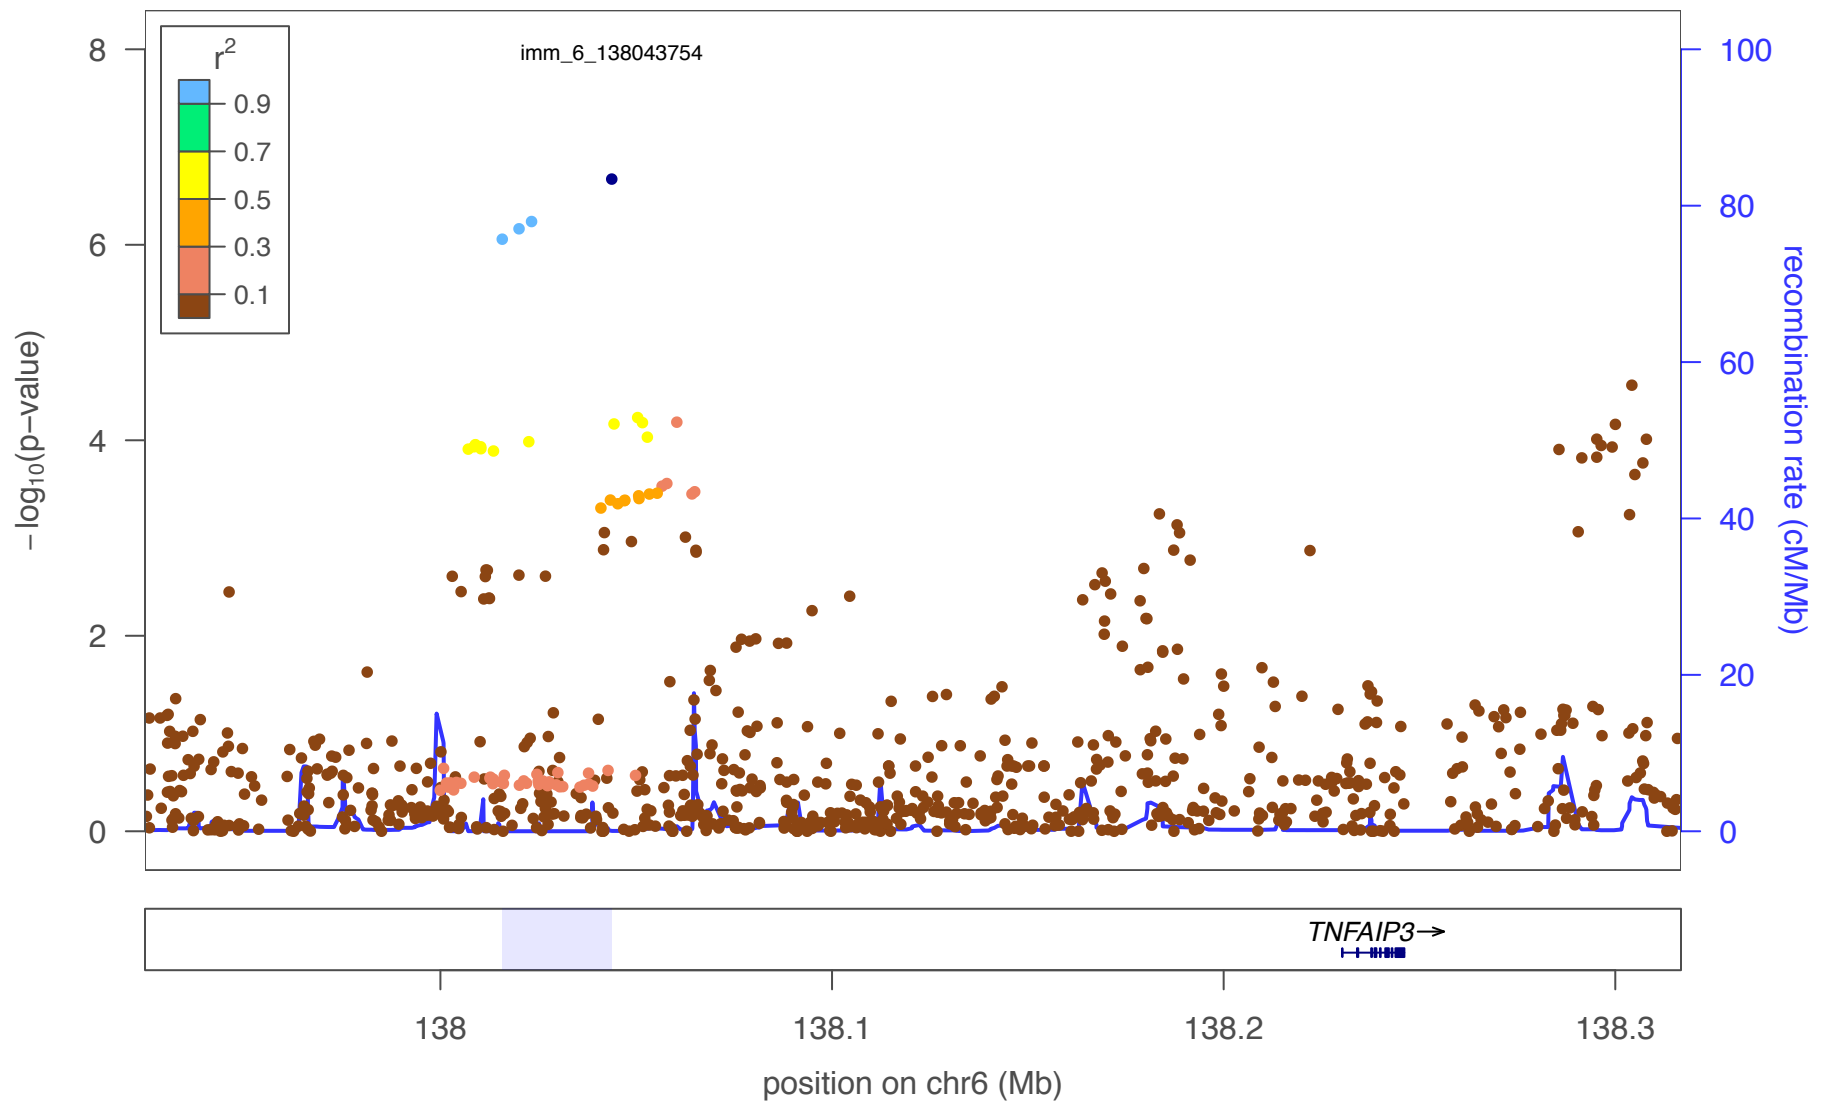



ImmunoChip

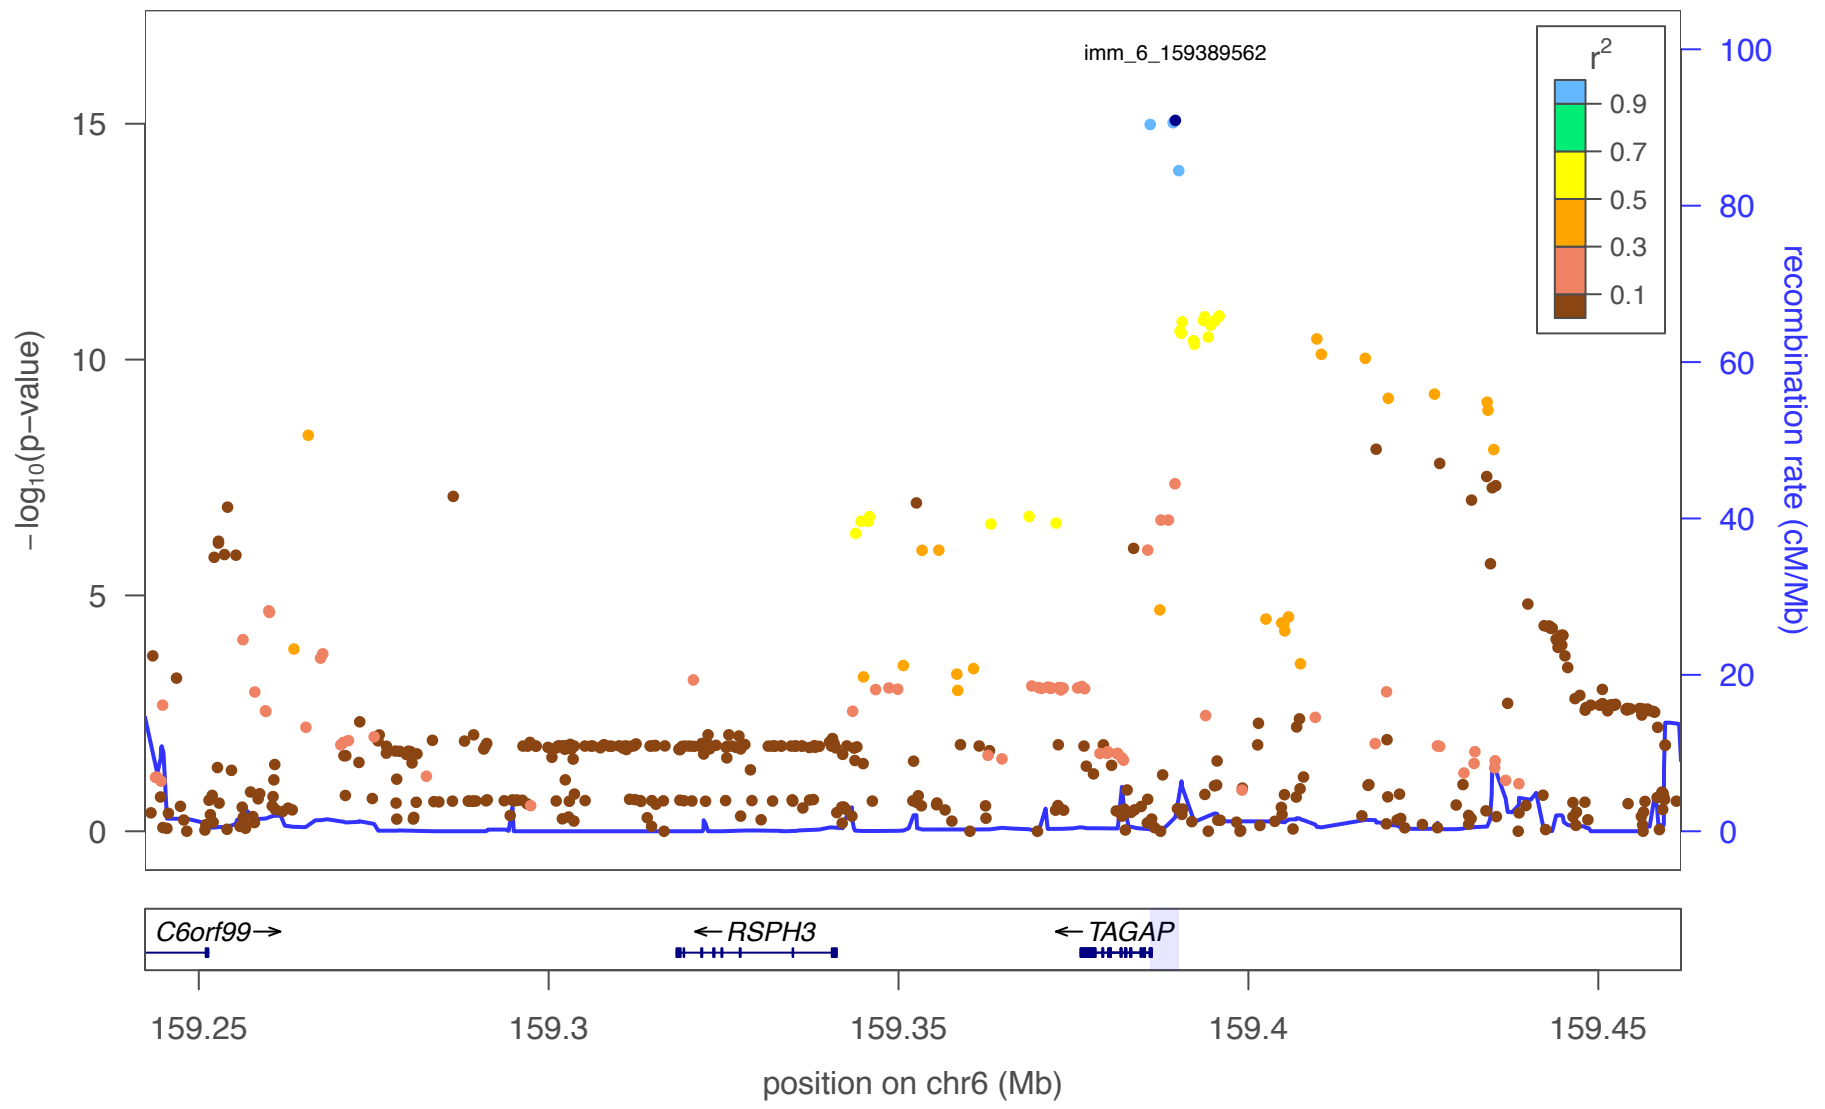

ImmunoChip

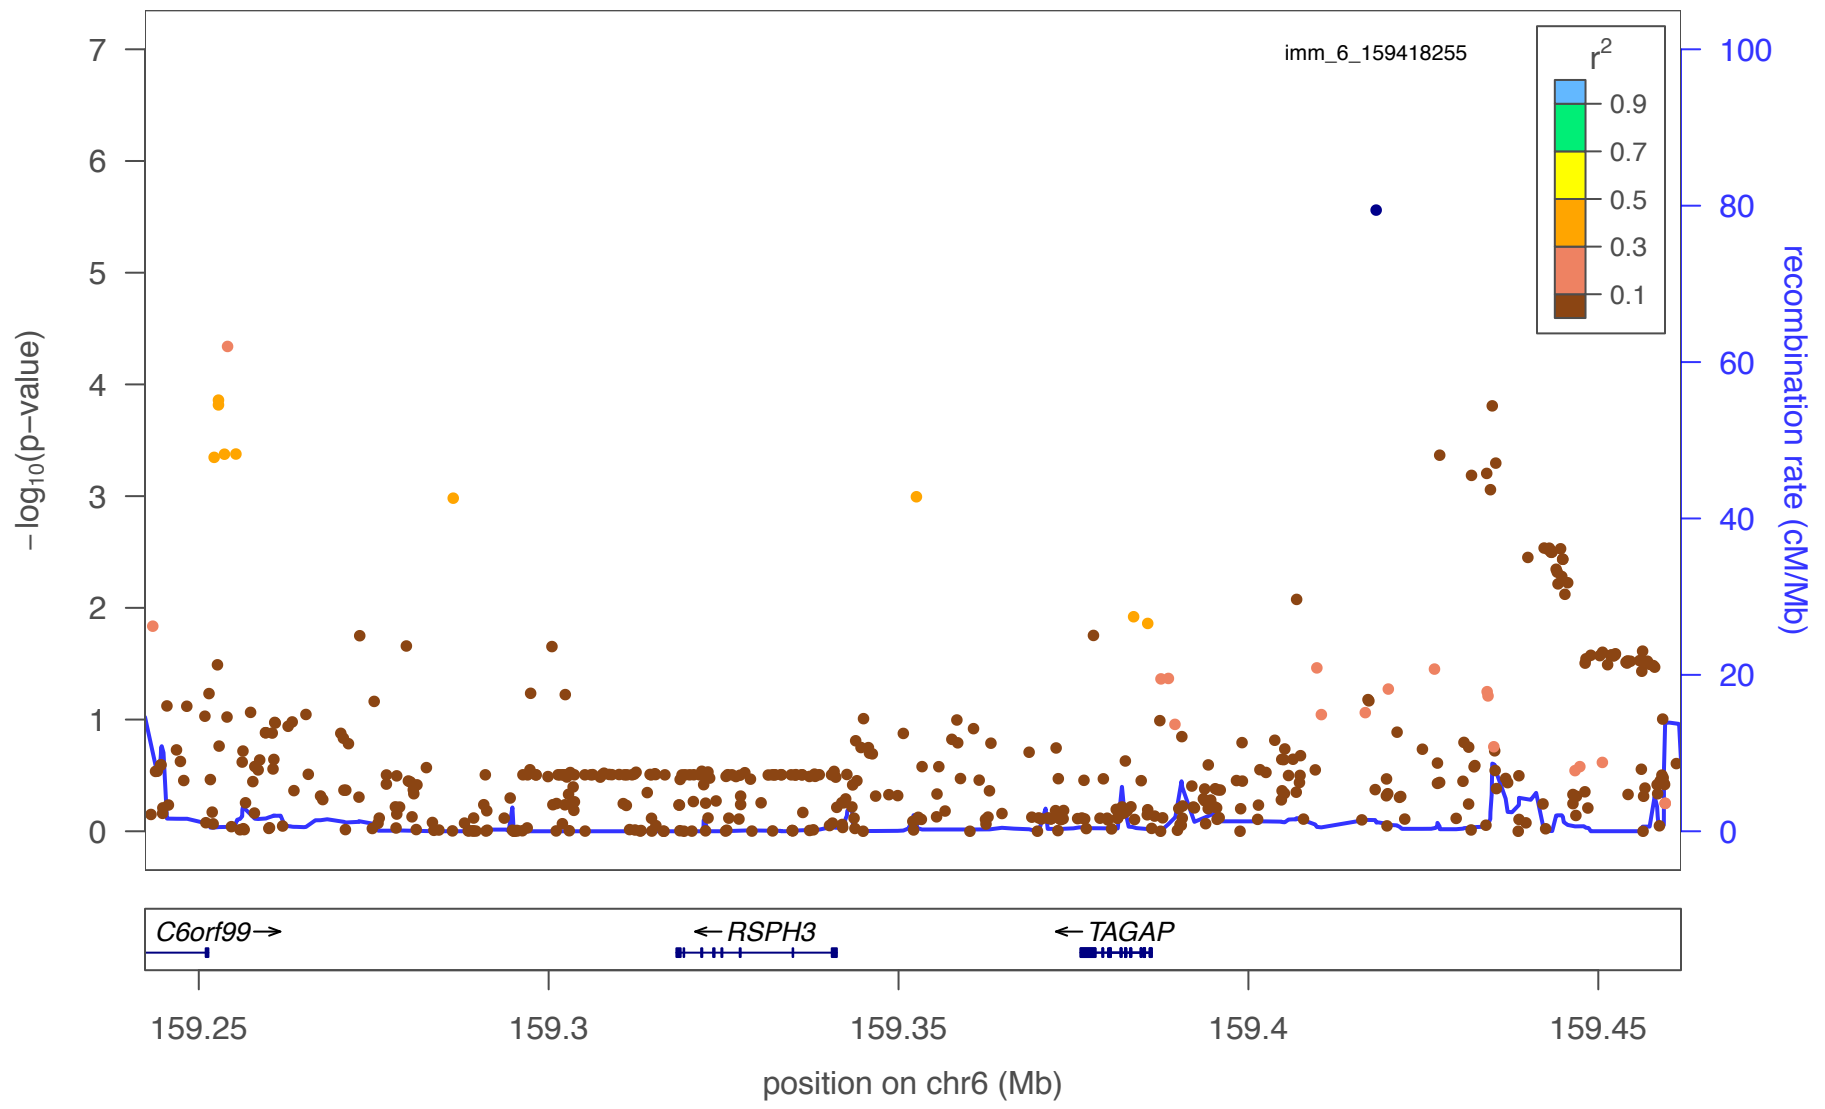

ImmunoChip

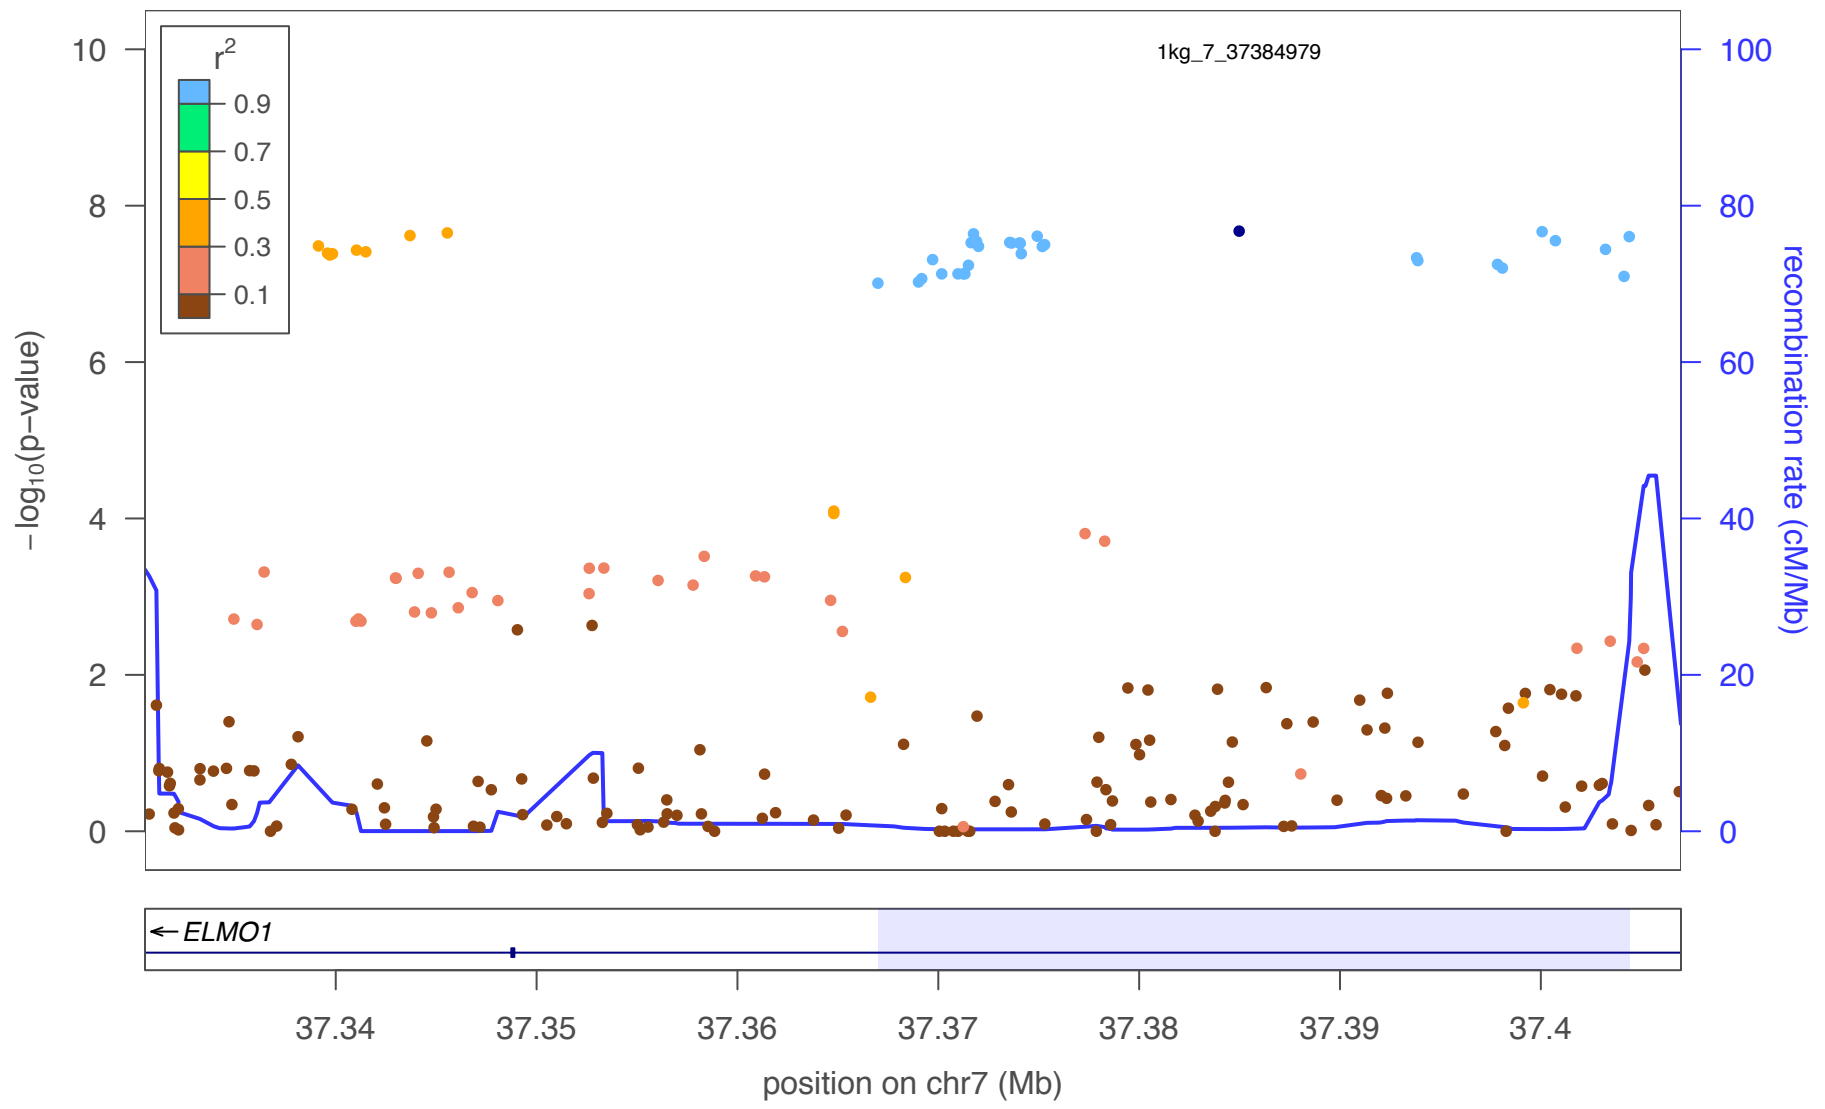

ImmunoChip 

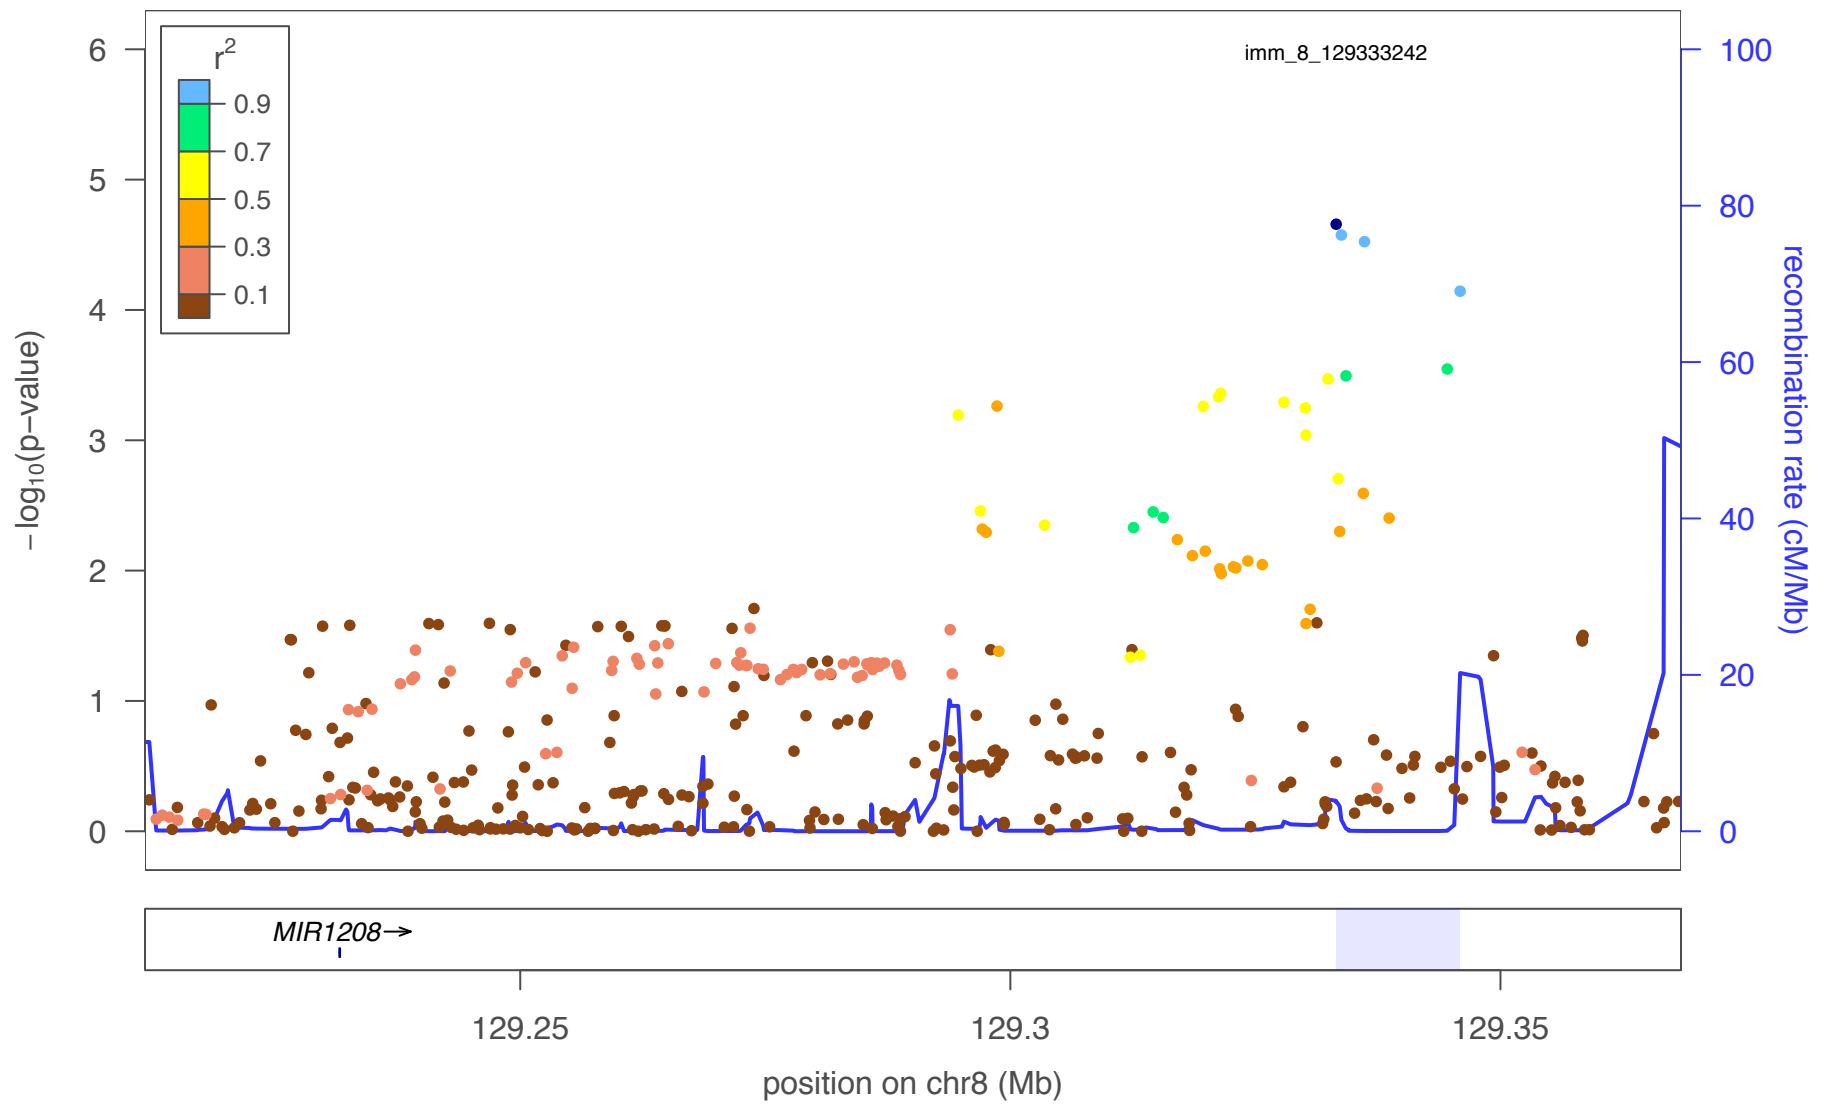

ImmunoChip

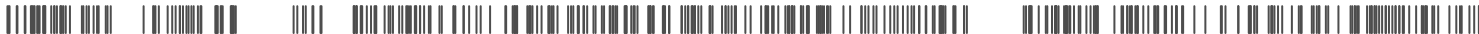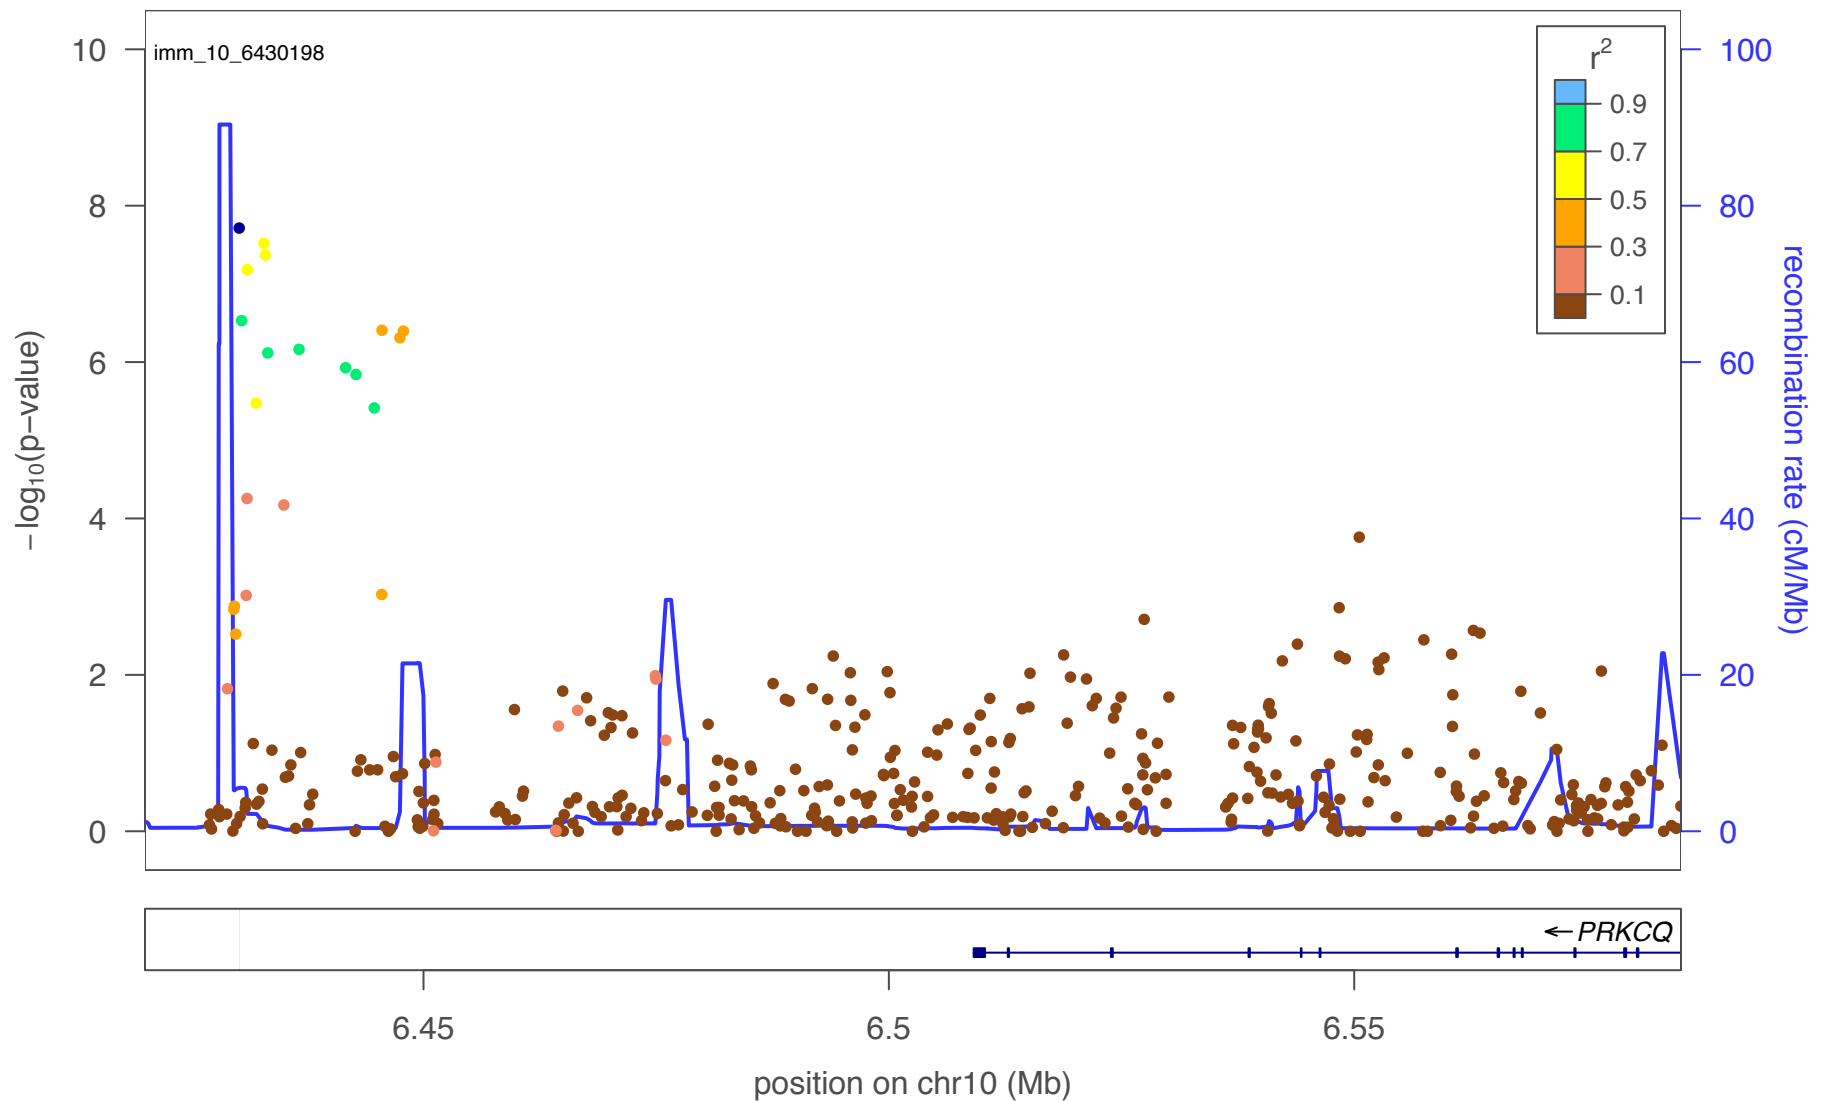

ImmunoChip 

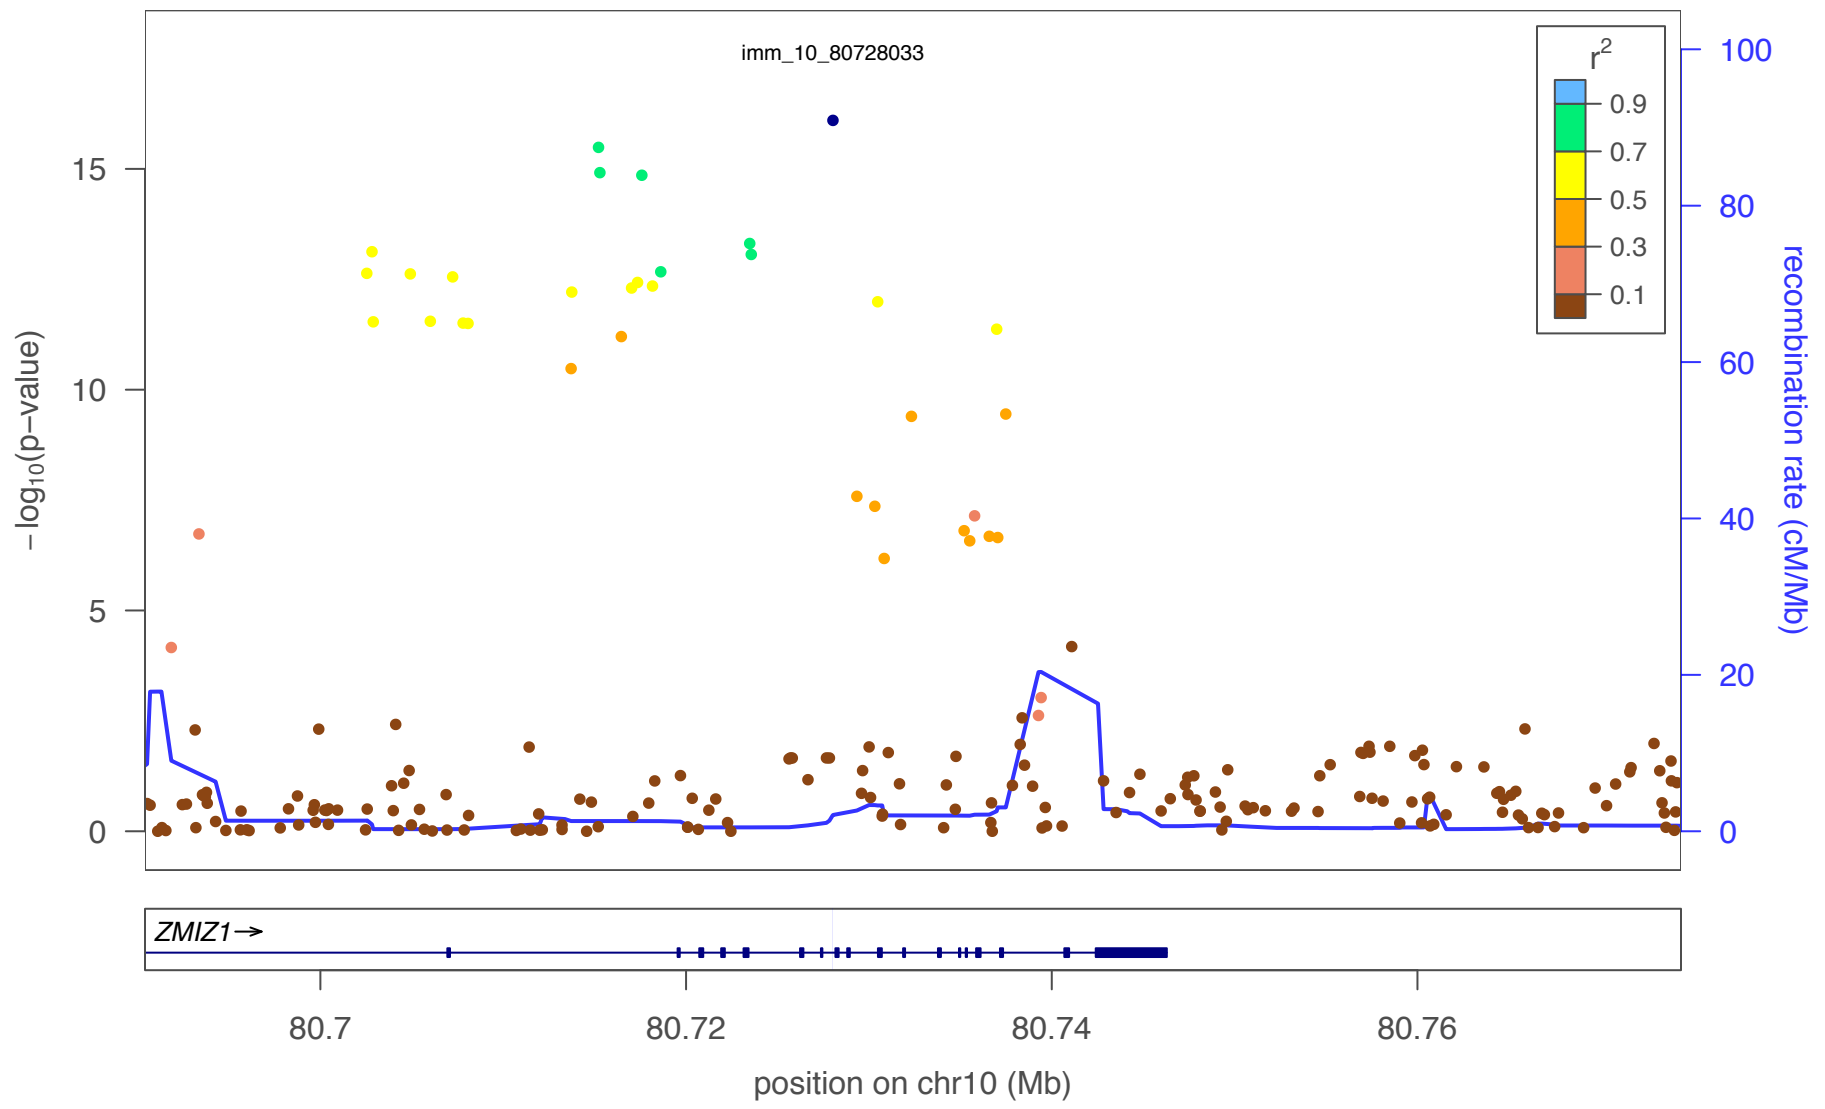

ImmunoChip

|

|

|

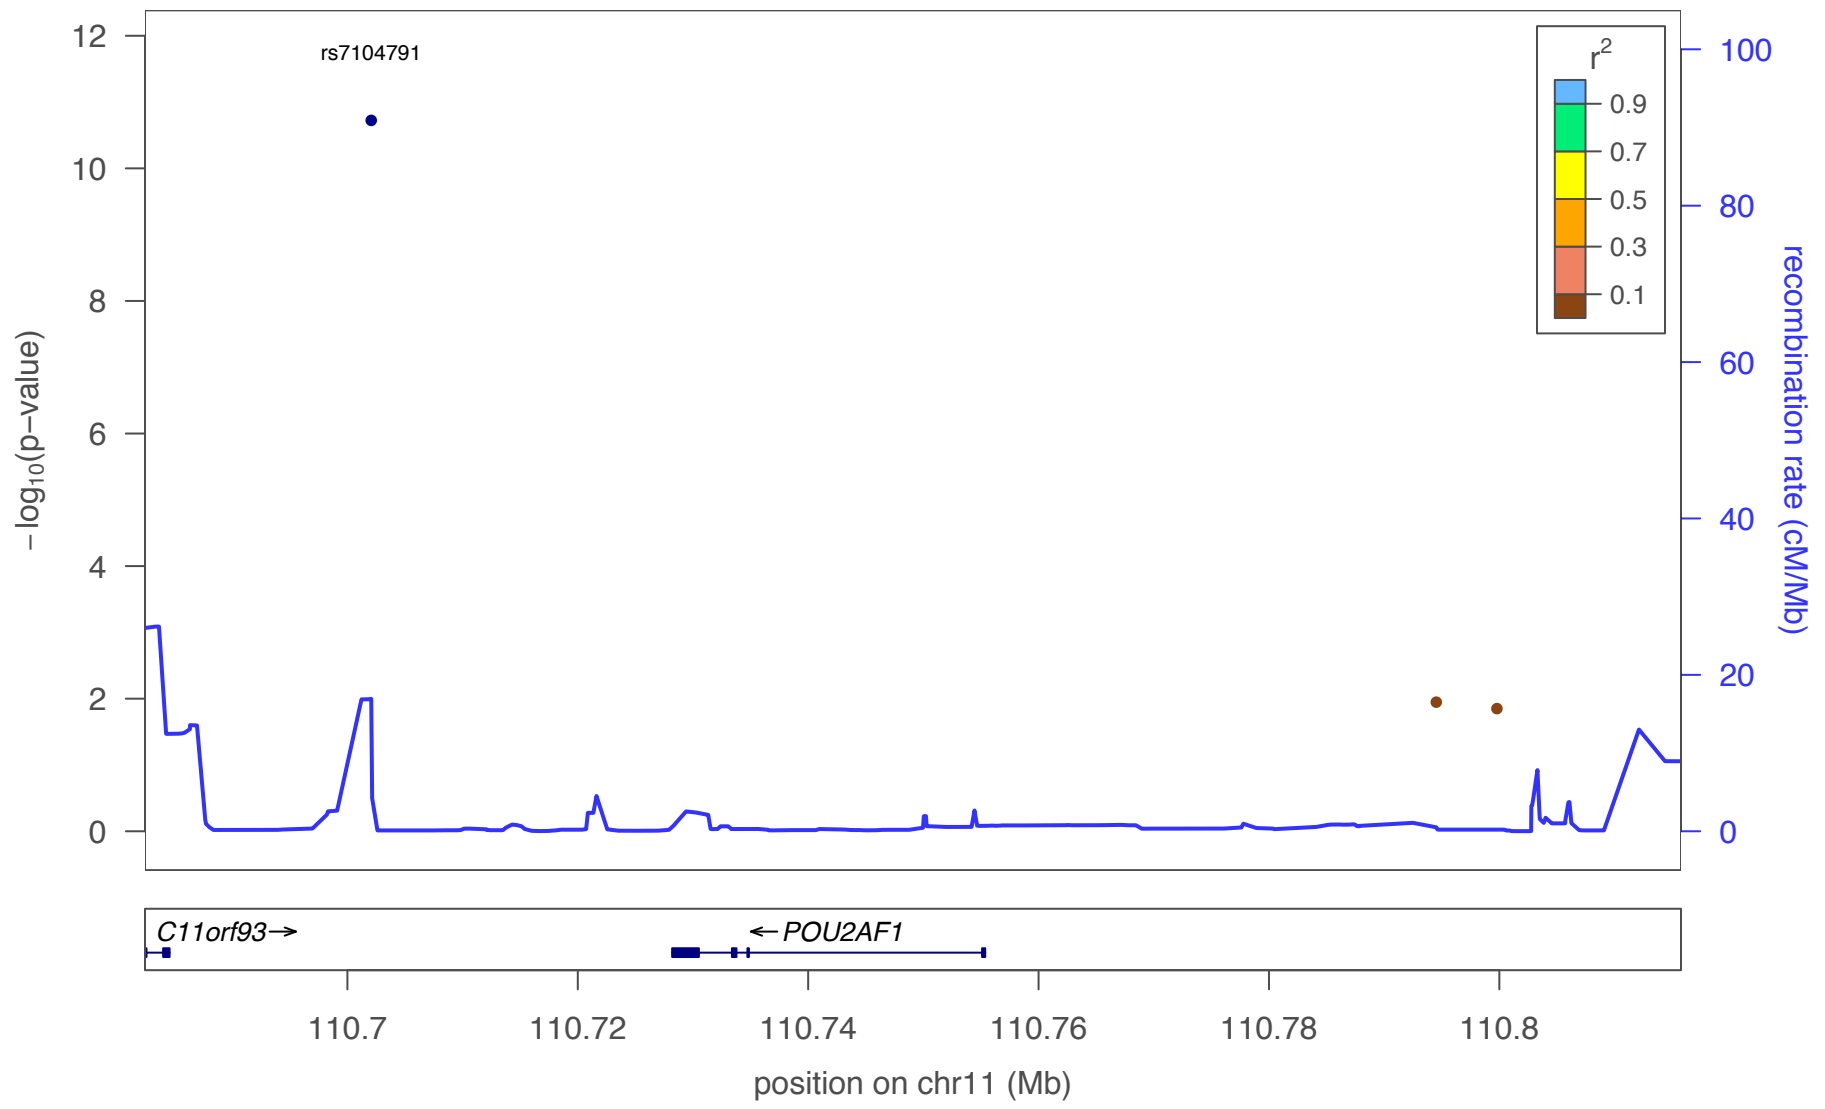

ImmunoChip 

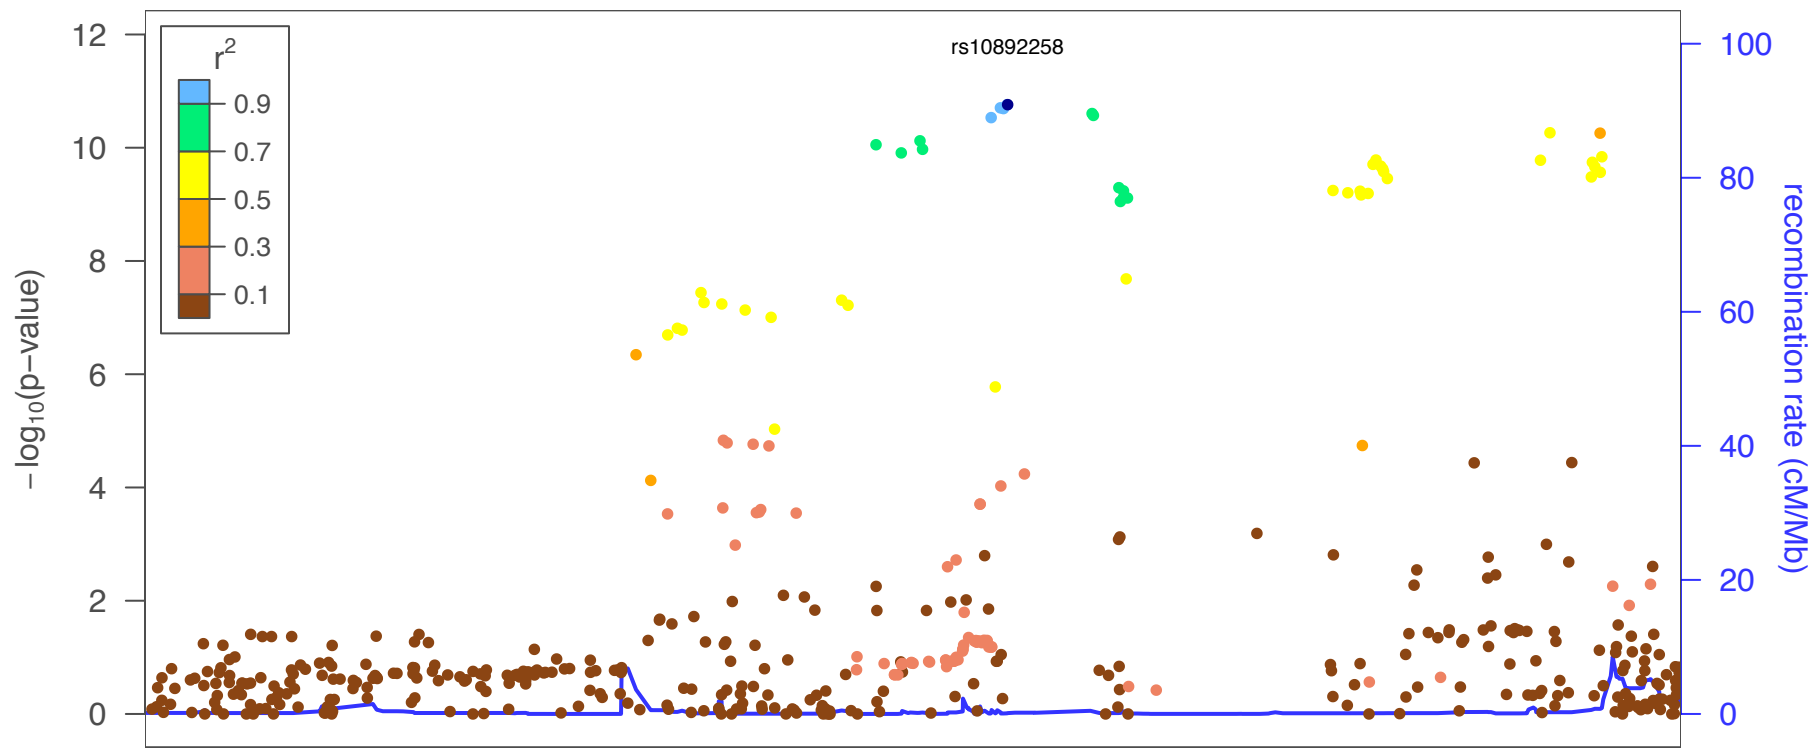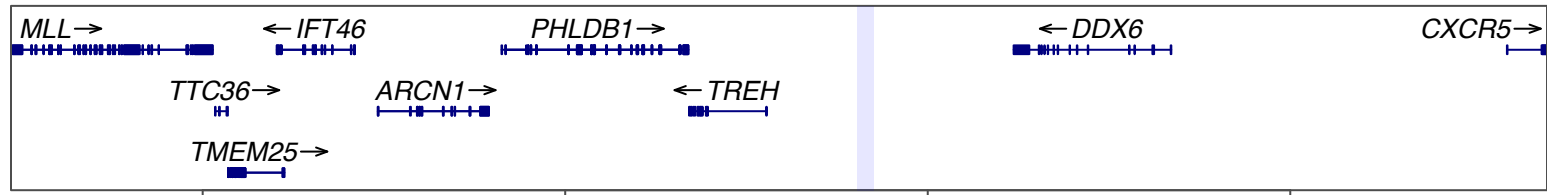

117.9                                      118                                      118.1                                      118.2

position on chr11 (Mb)



ImmunoChip

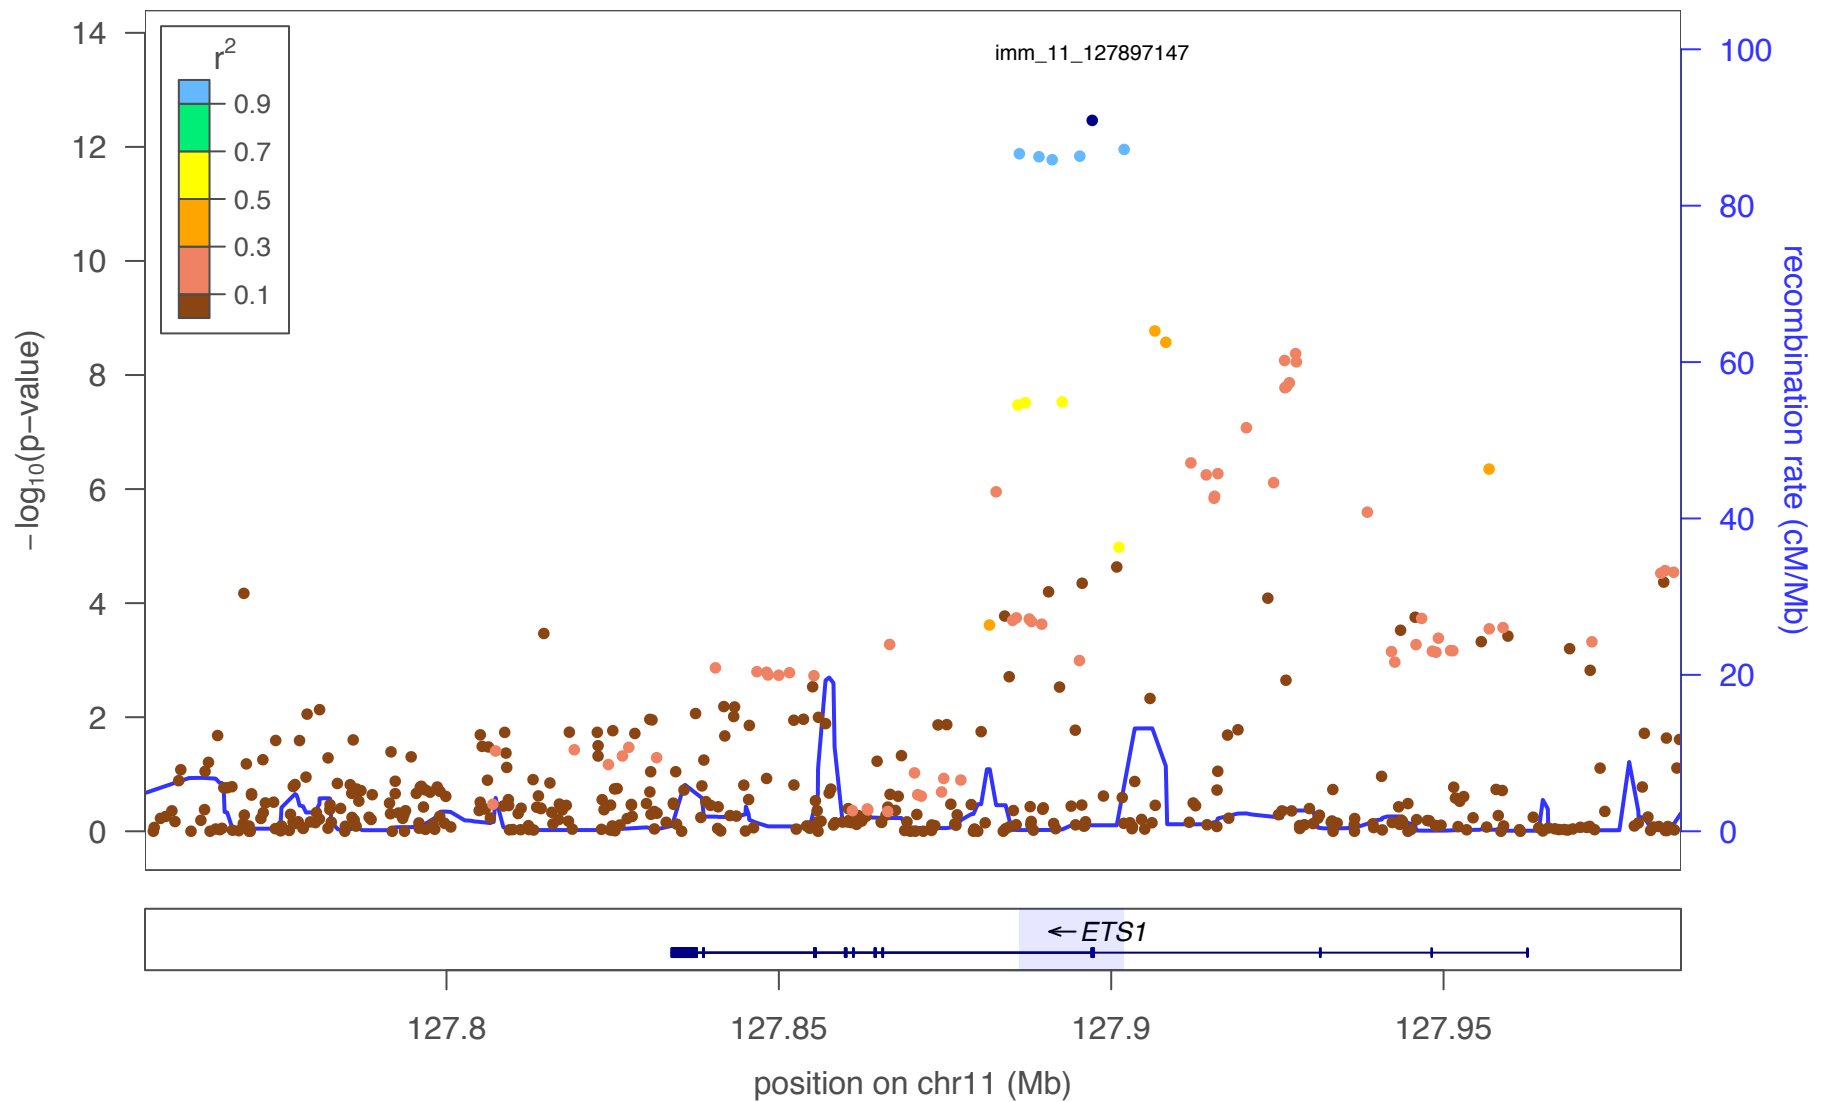

ImmunoChip

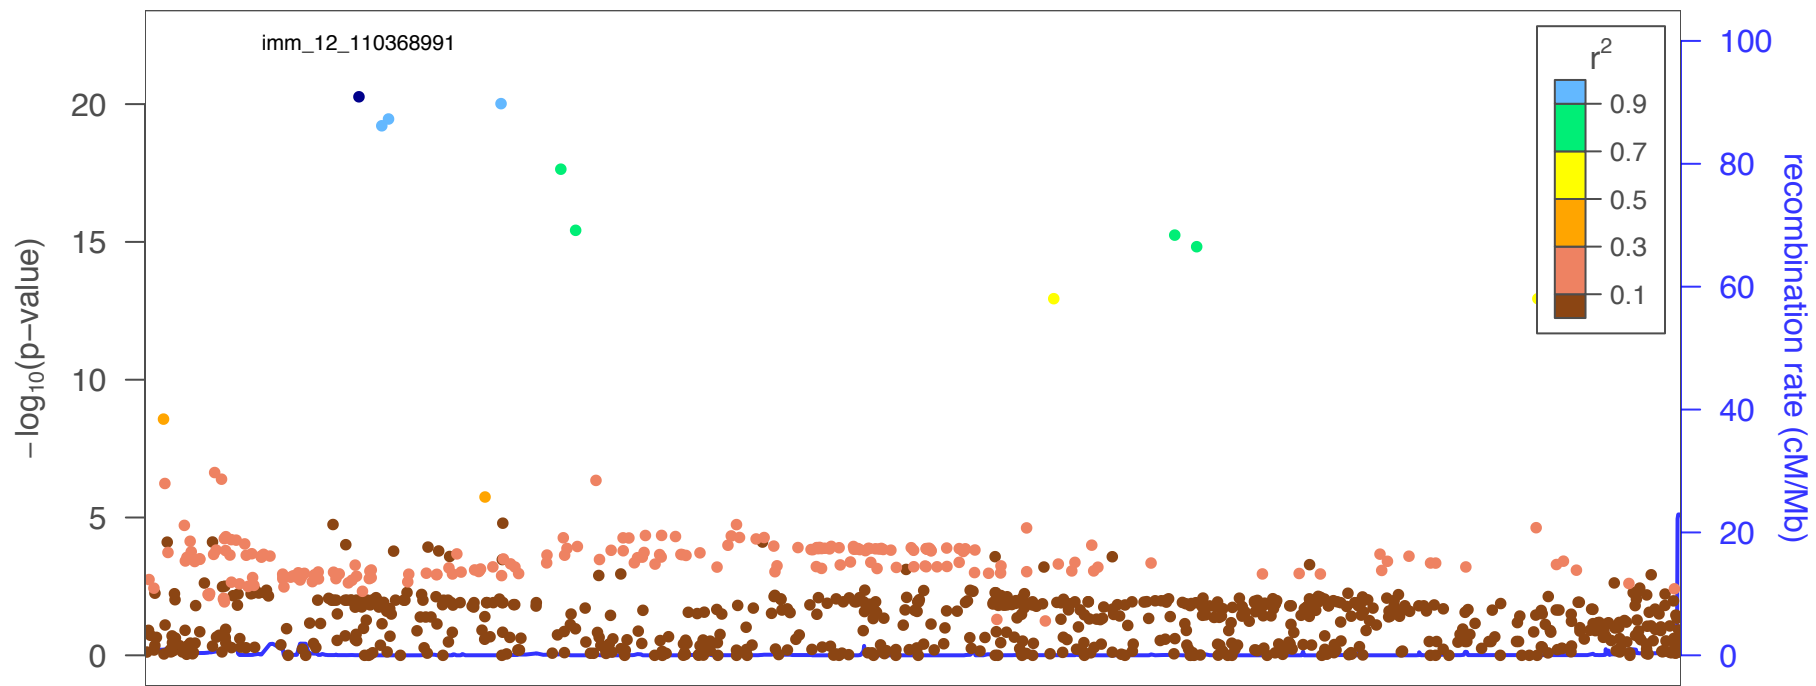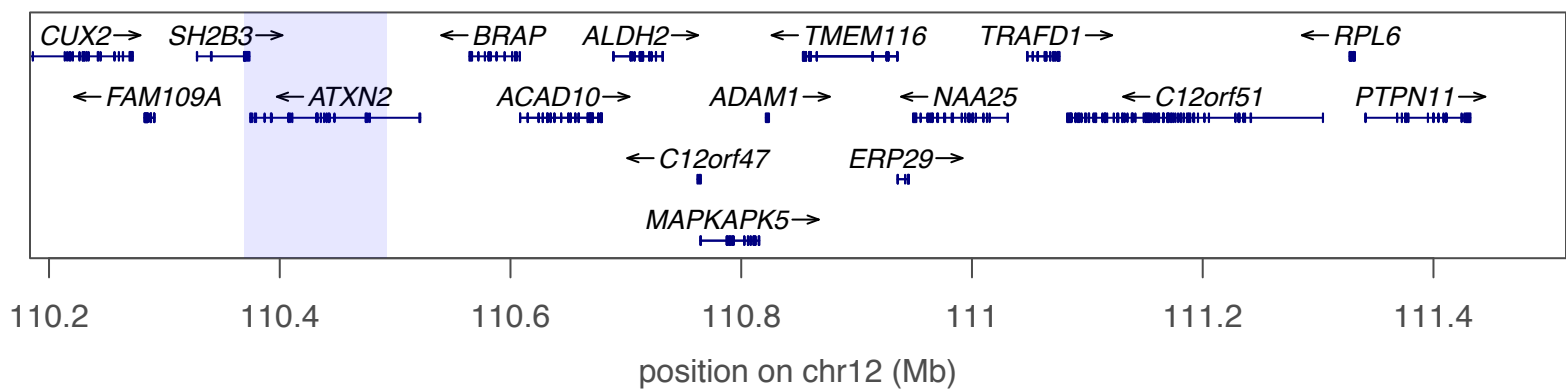

ImmunoChip 

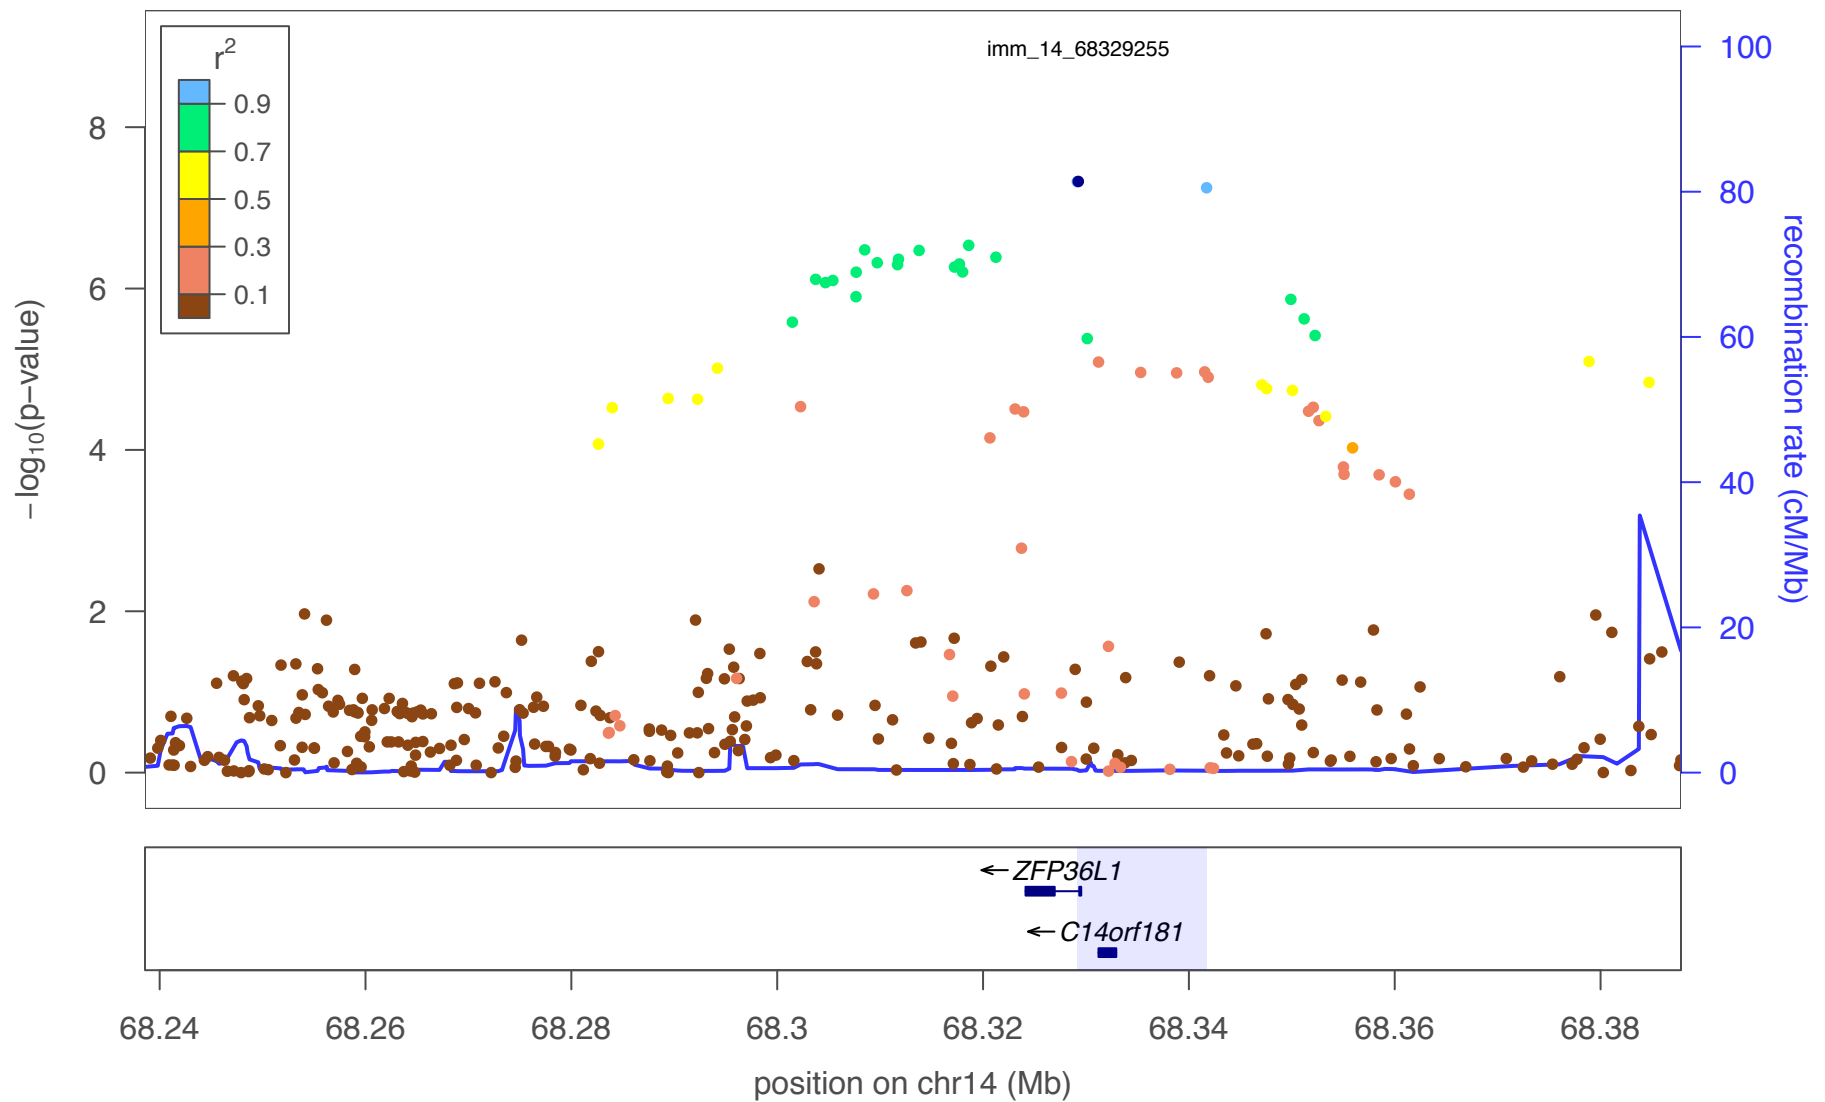

ImmunoChip

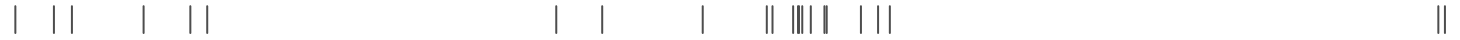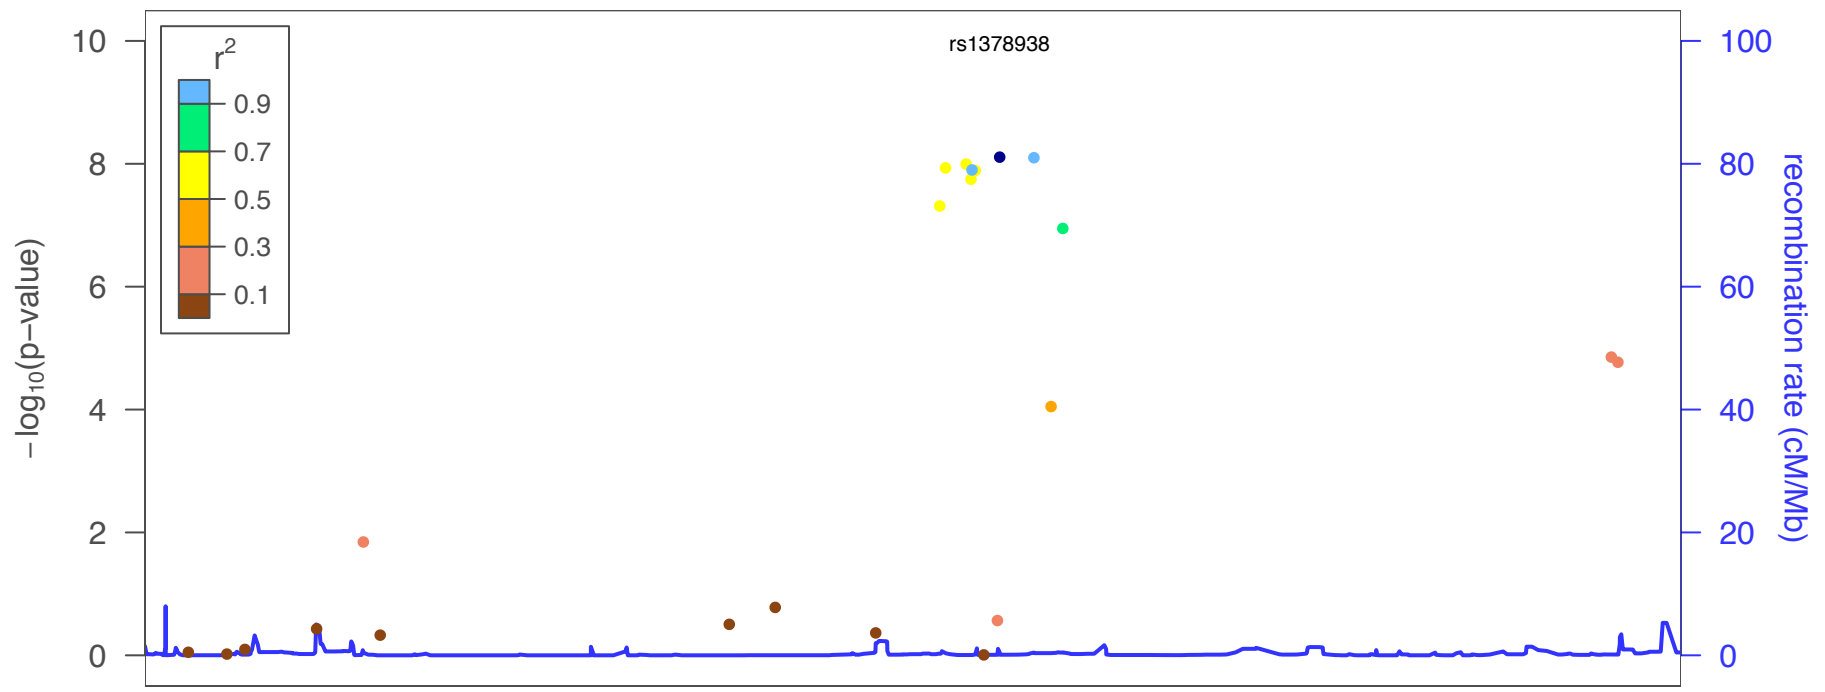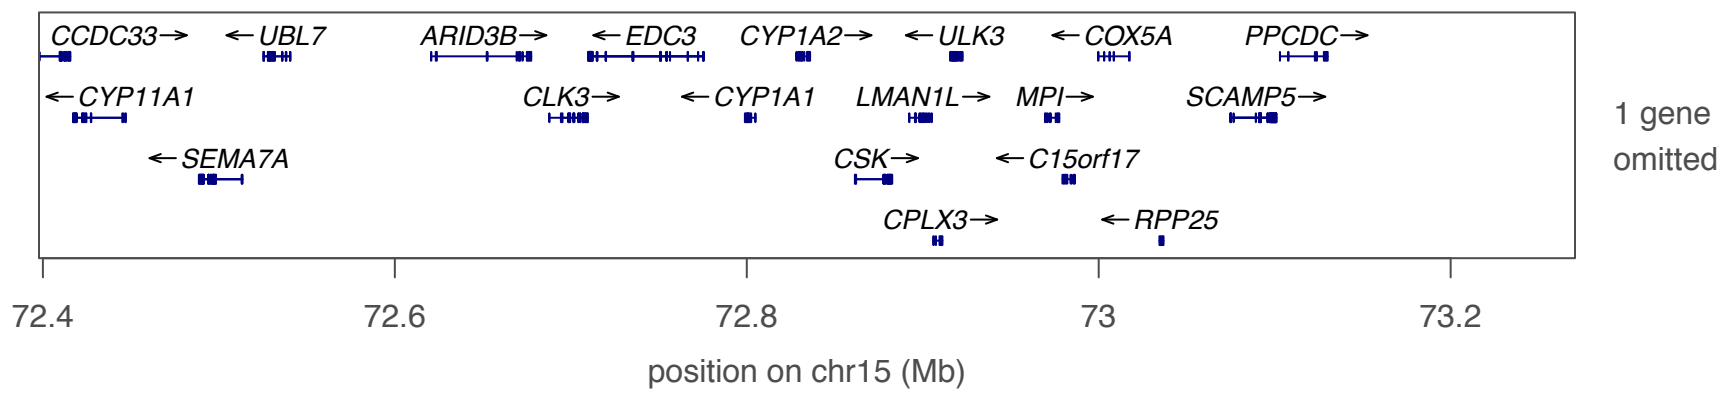

ImmunoChip

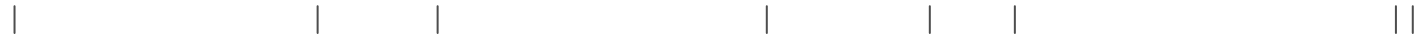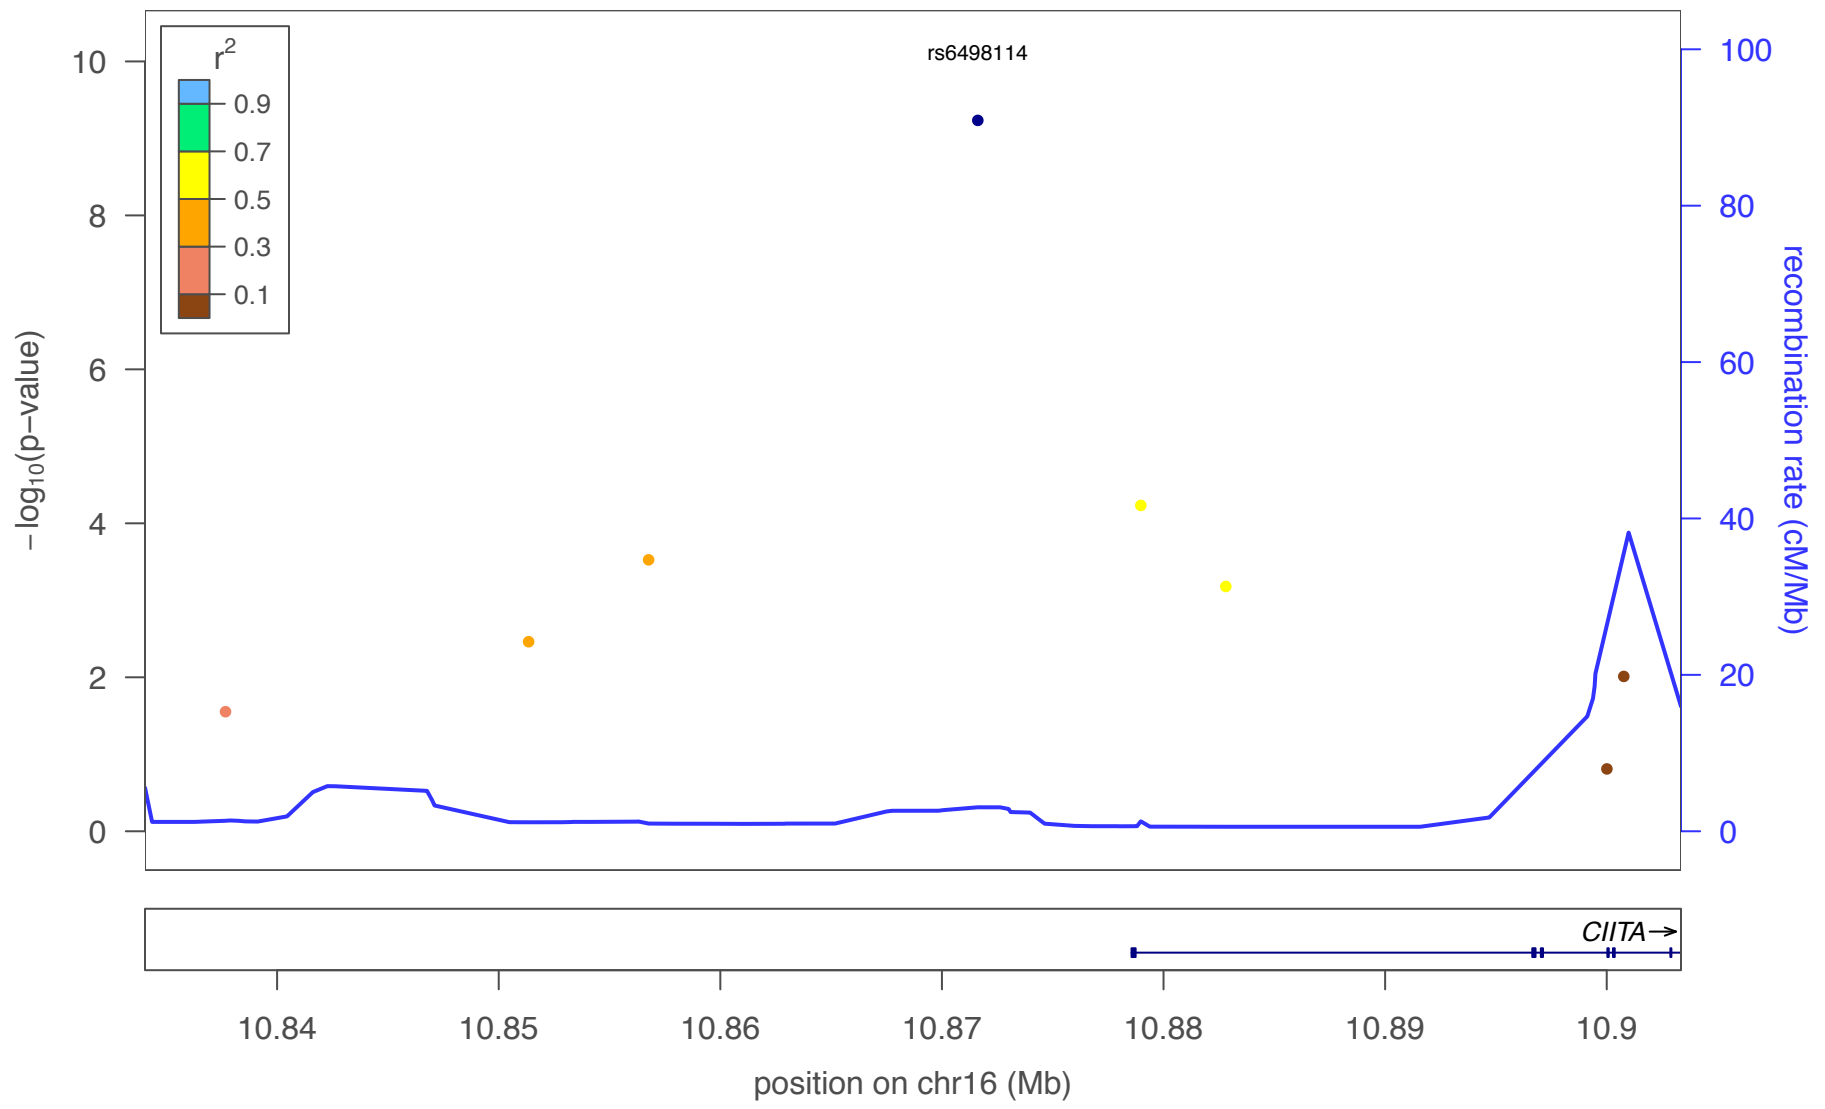

ImmunoChip

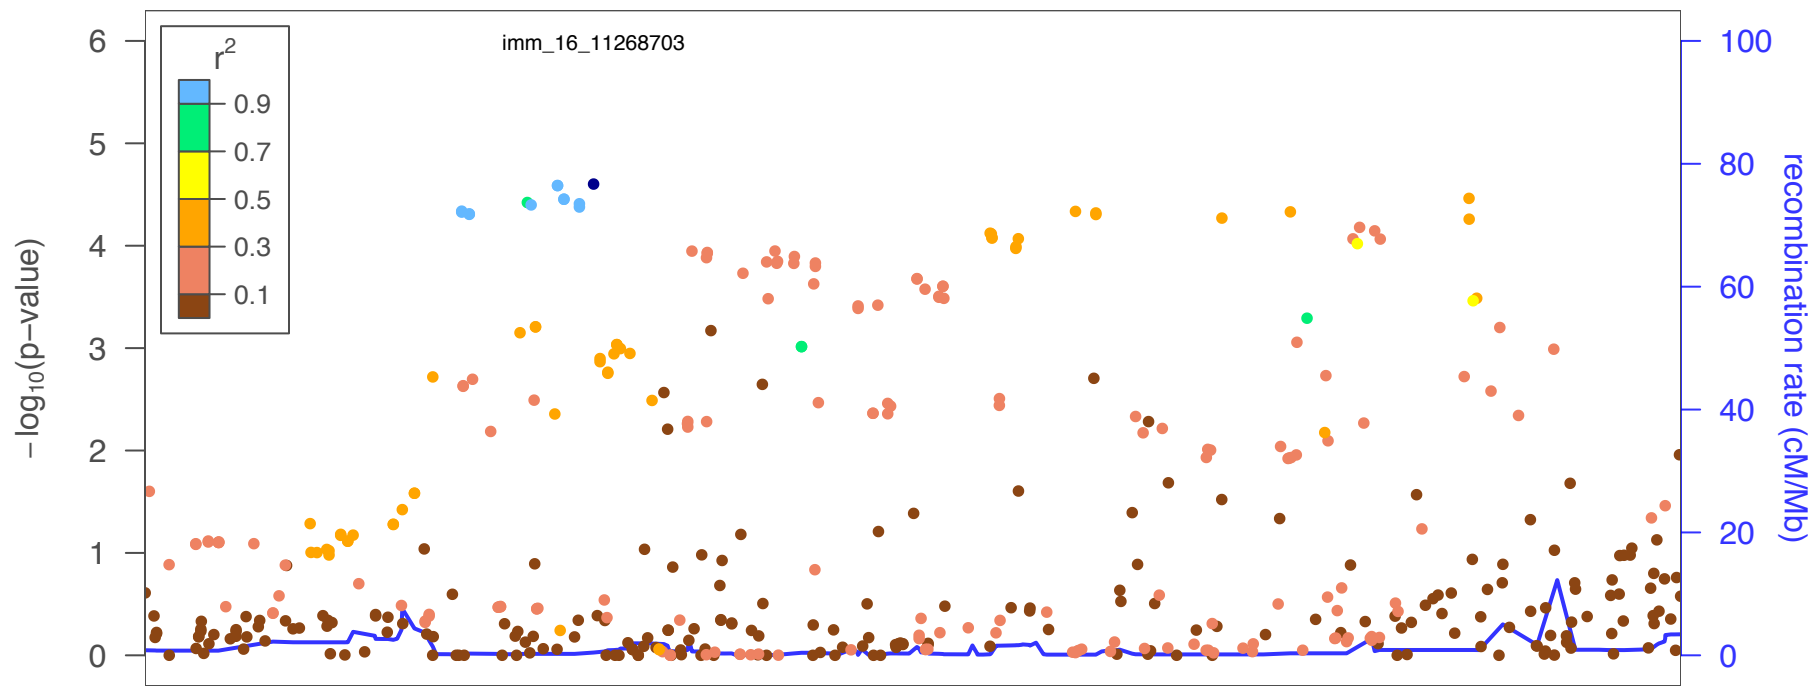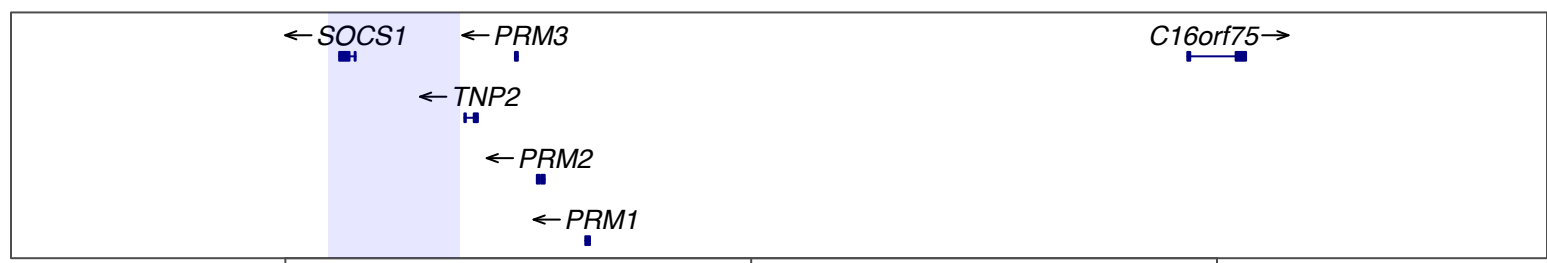

11.25

11.3

11.35

position on chr16 (Mb)

ImmunoChip

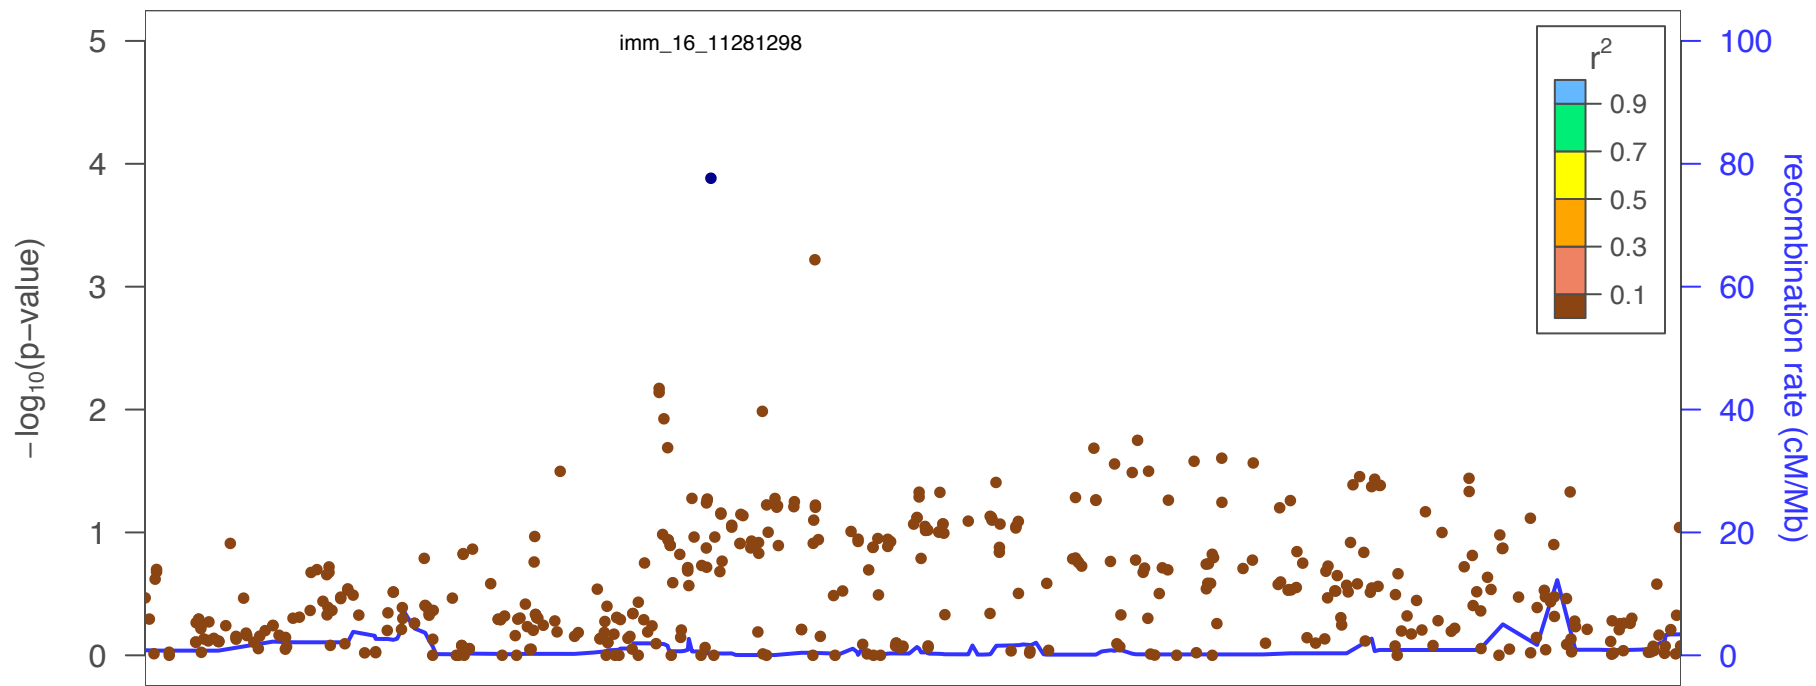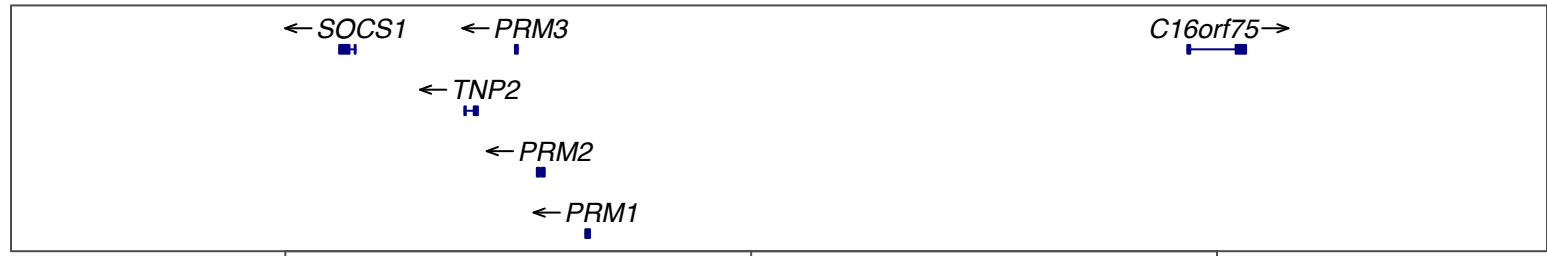

11.25

11.3

11.35

position on chr16 (Mb)

ImmunoChip

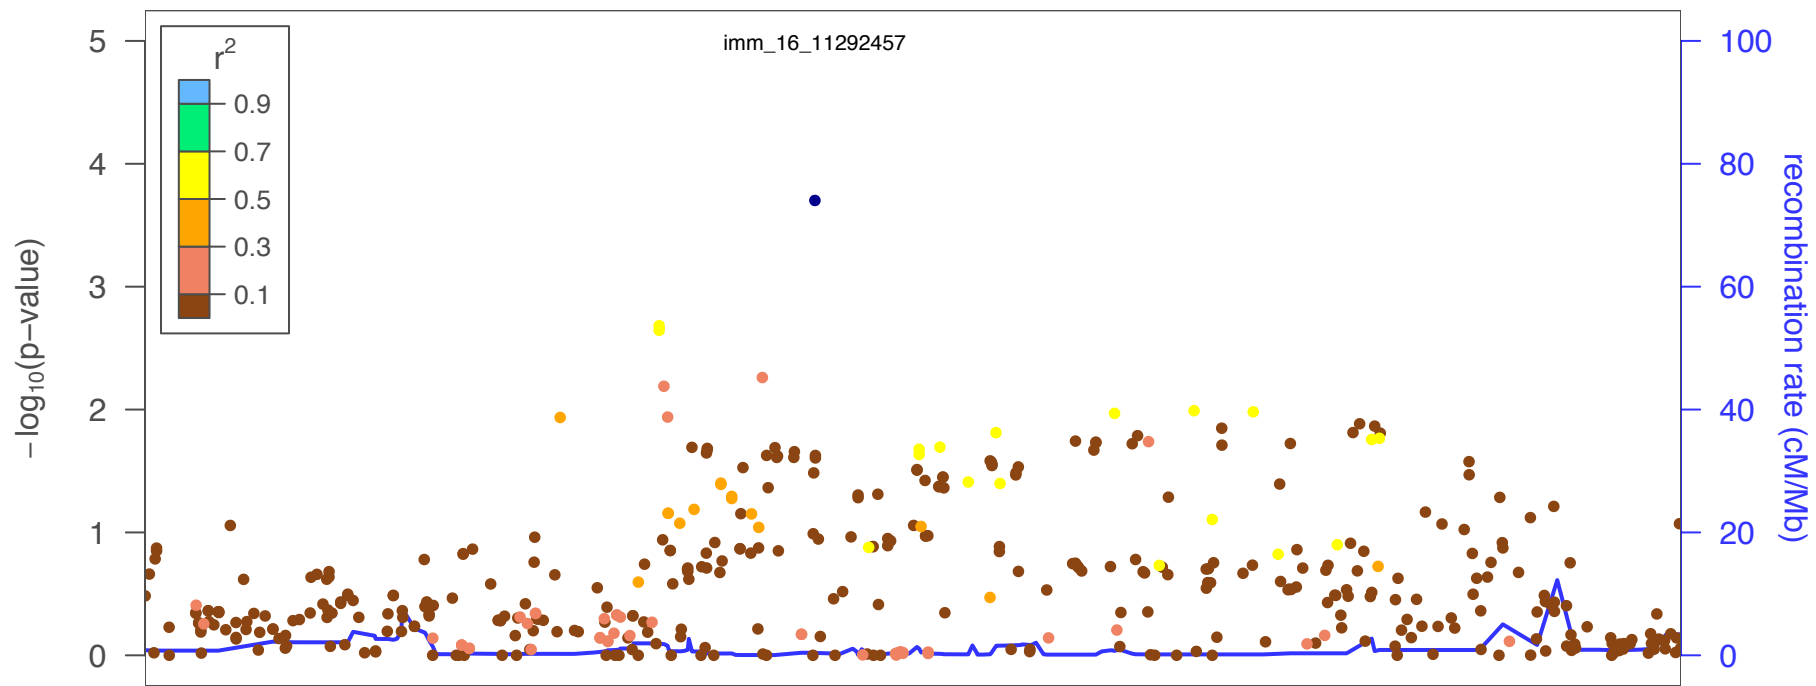

11.25 11.3 11.35

position on chr16 (Mb)



ImmunoChip

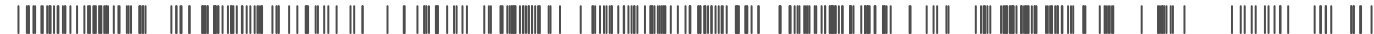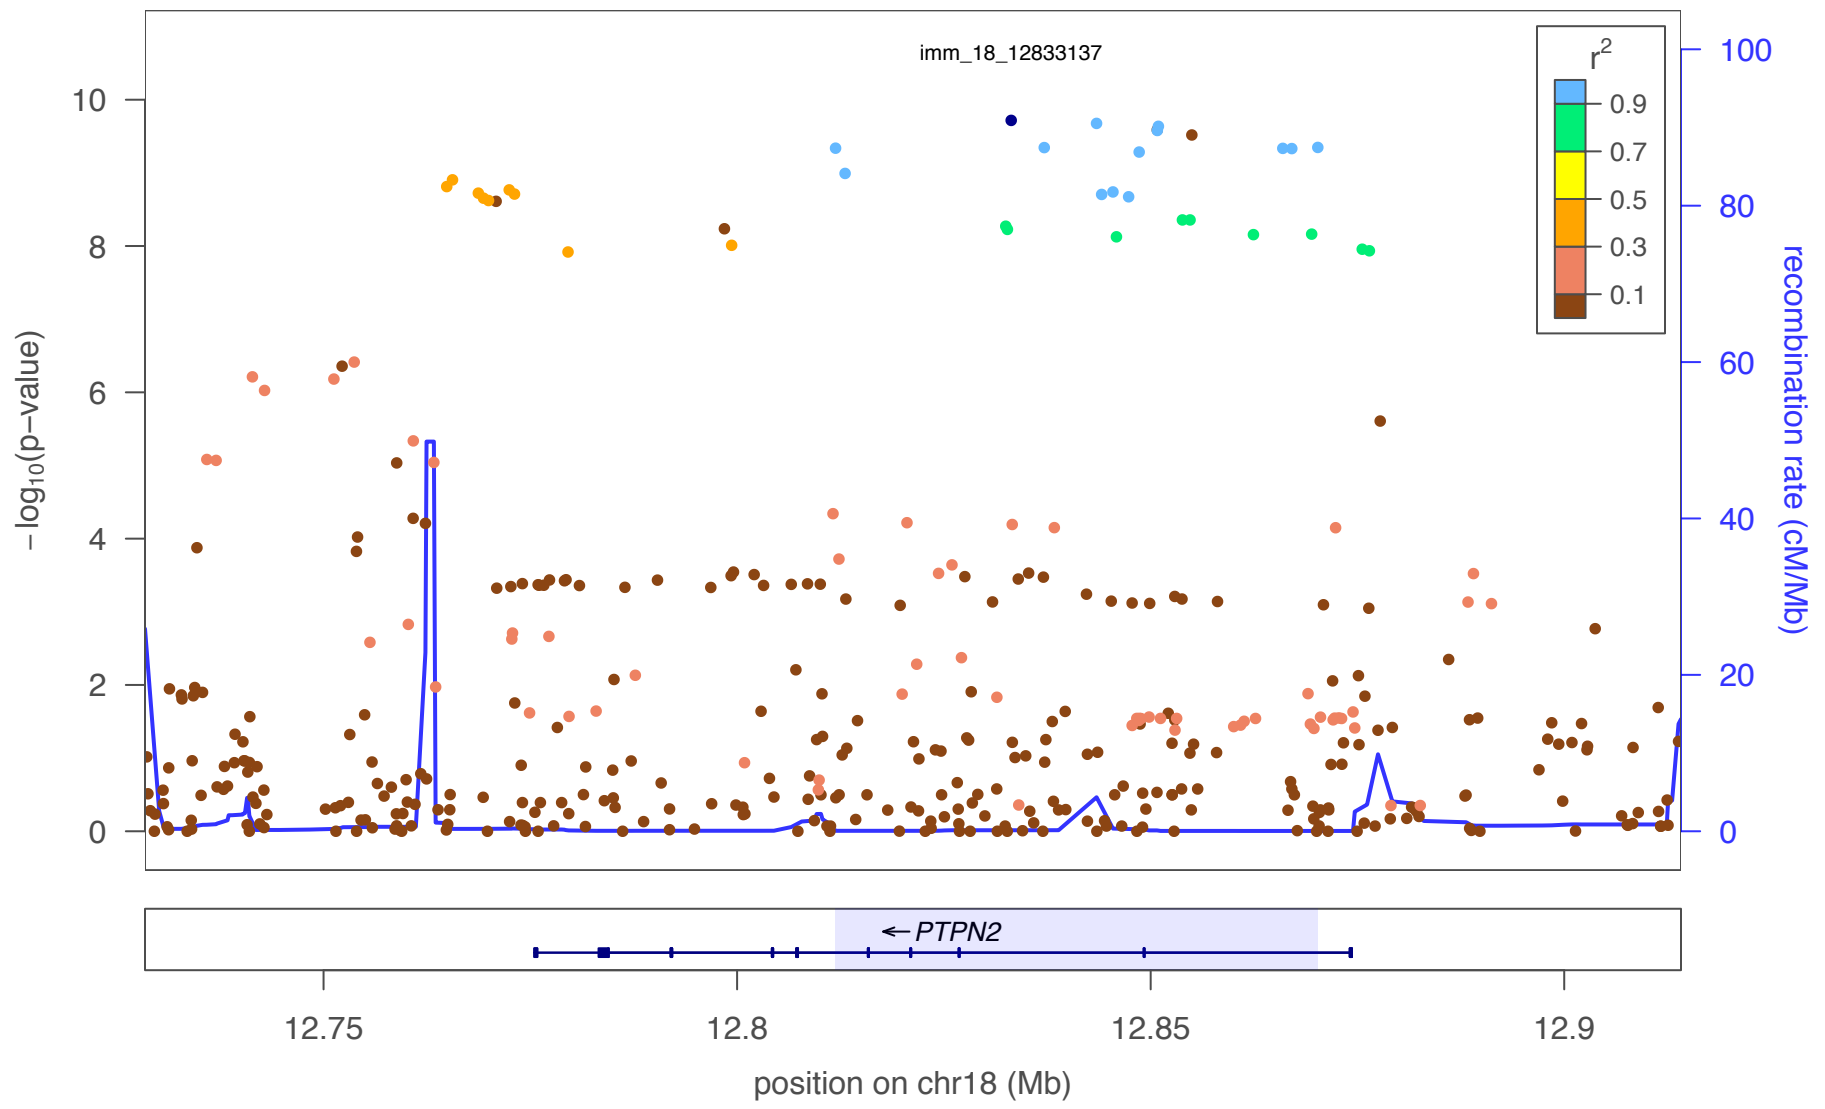

ImmunoChip

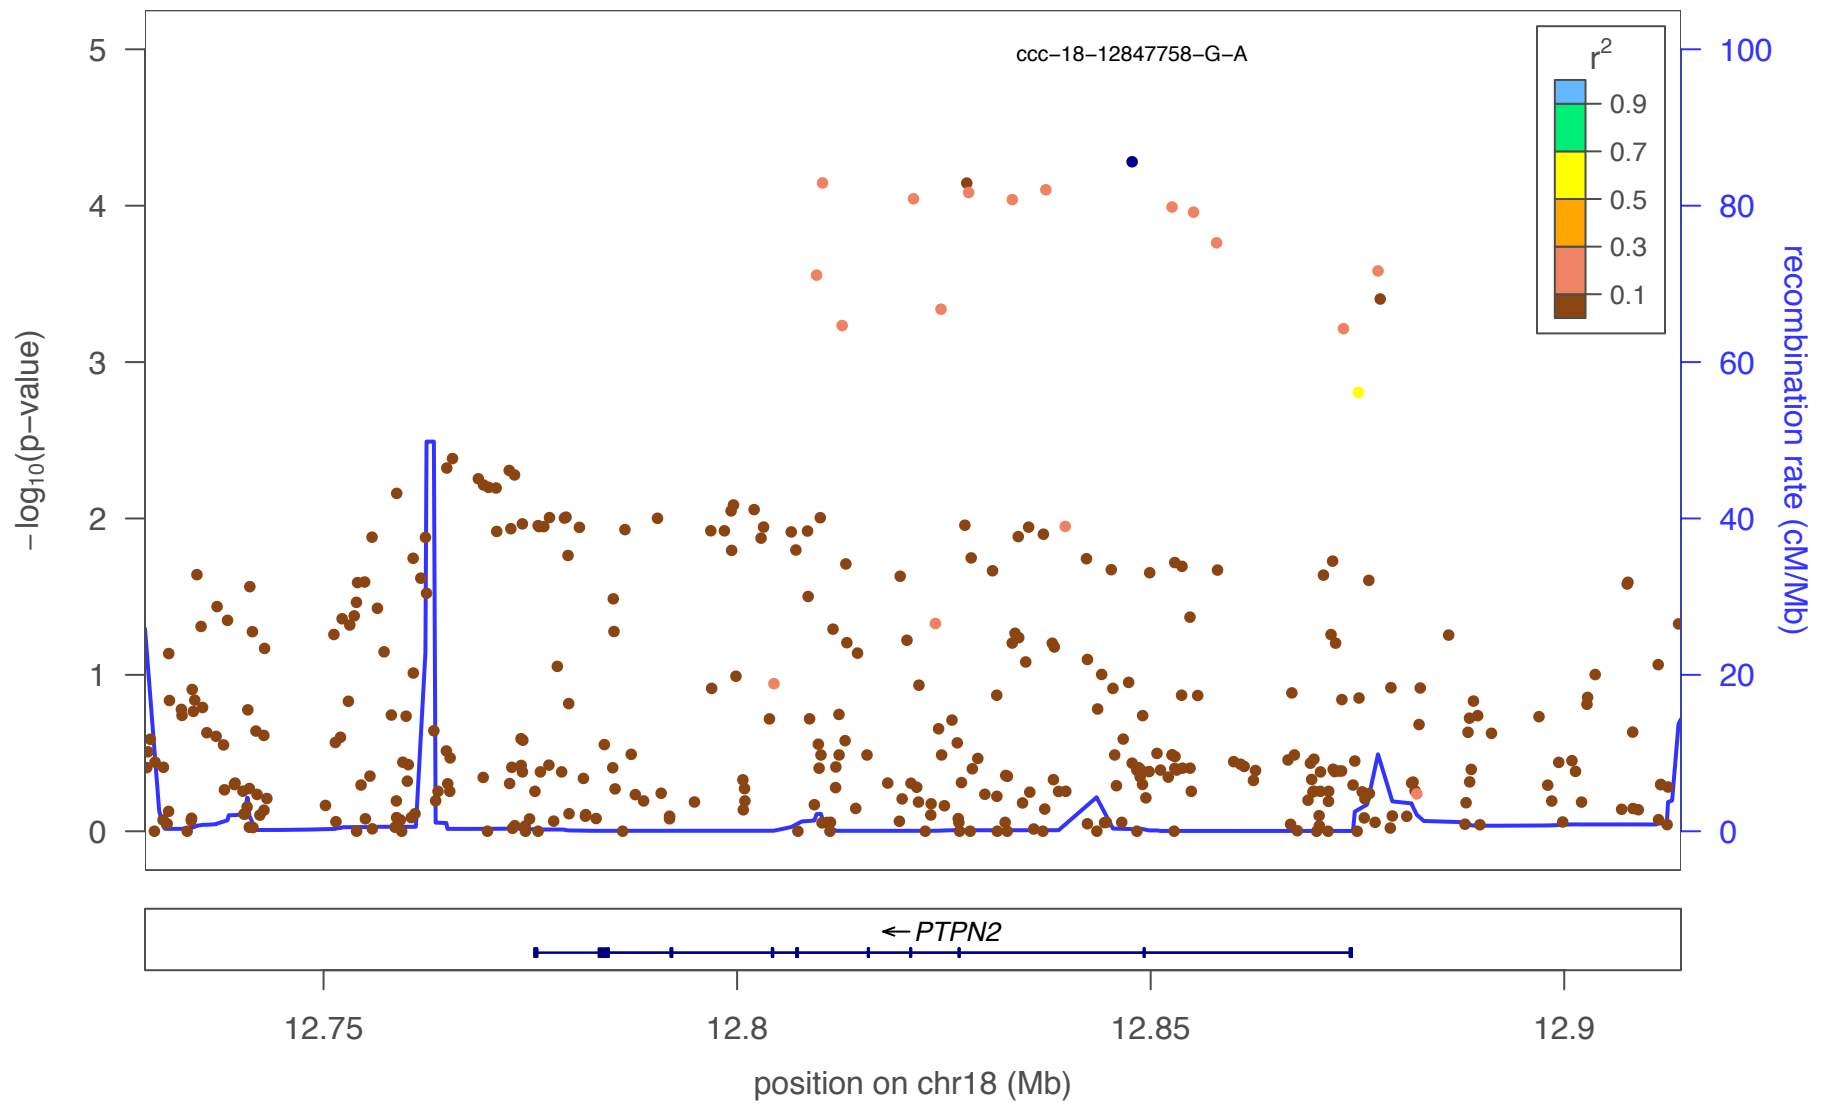

ImmunoChip | 

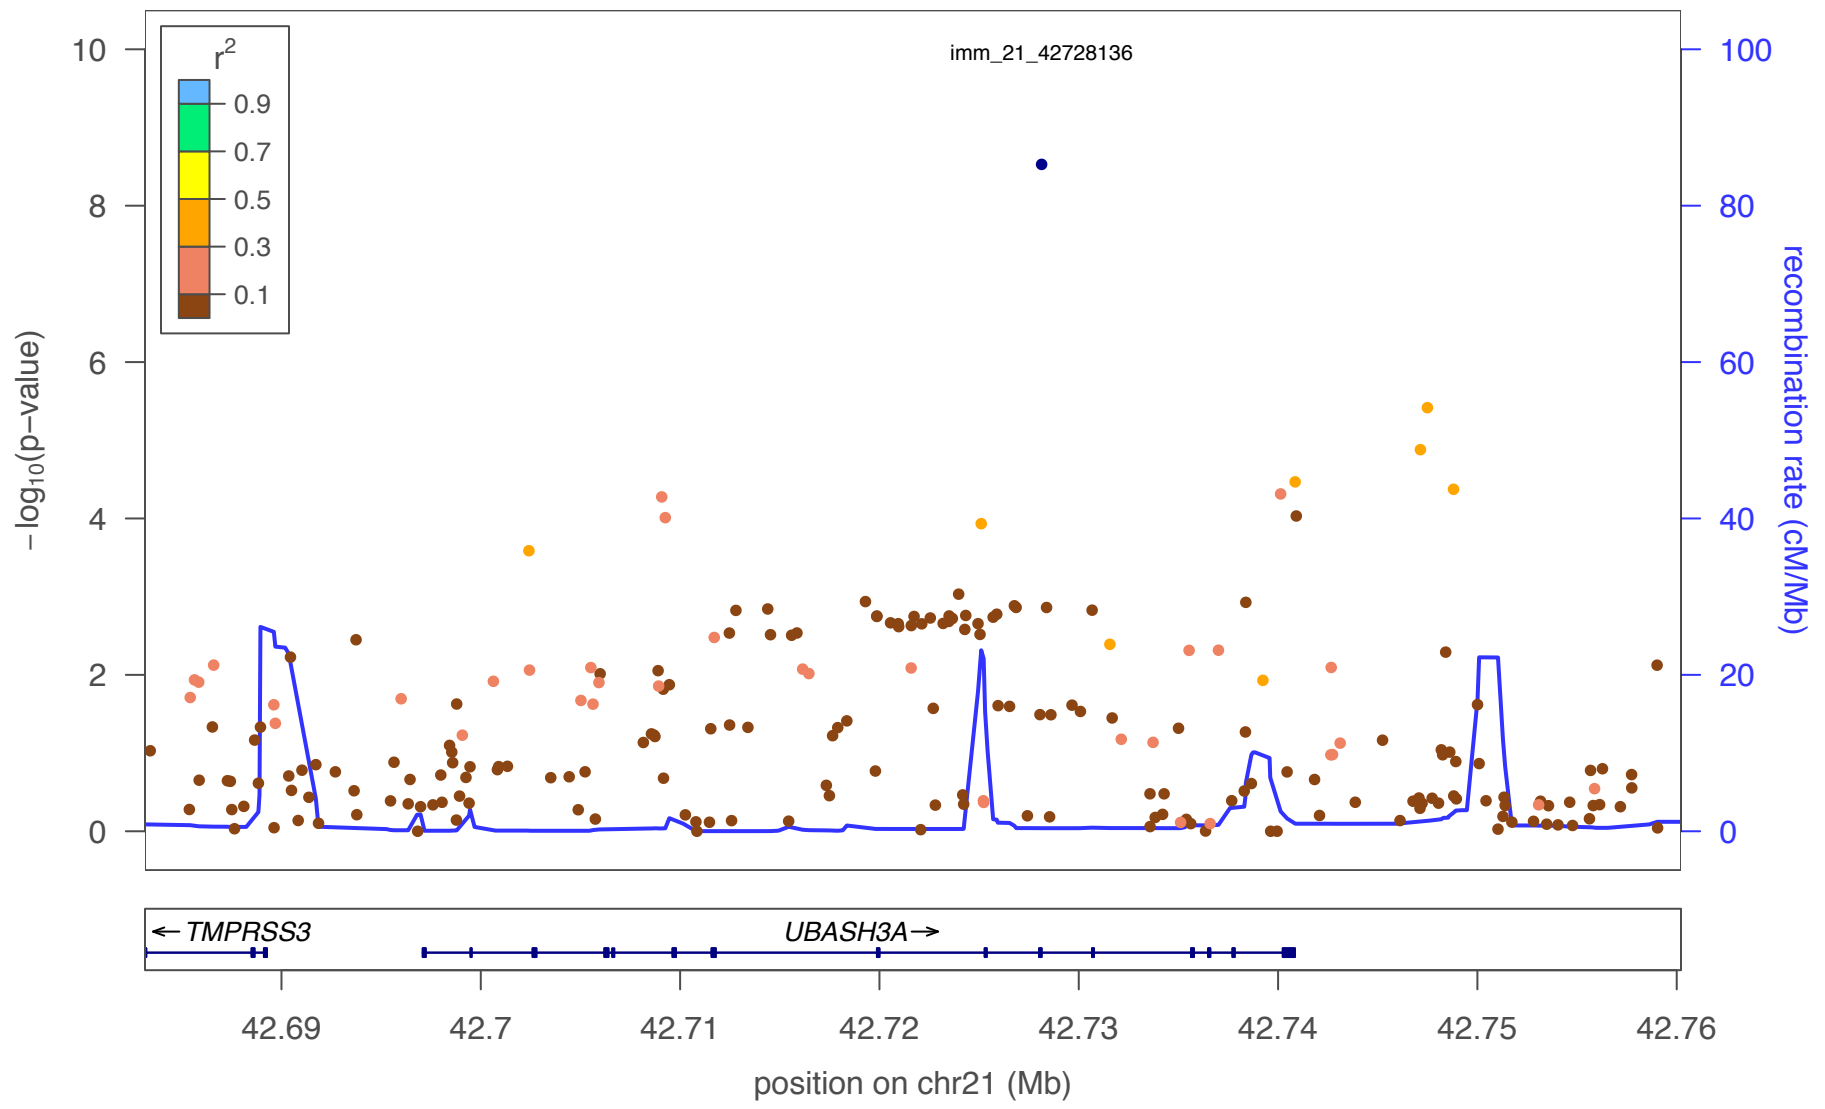



ImmunoChip

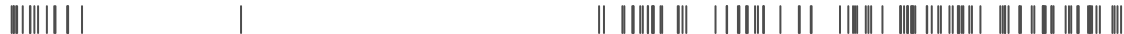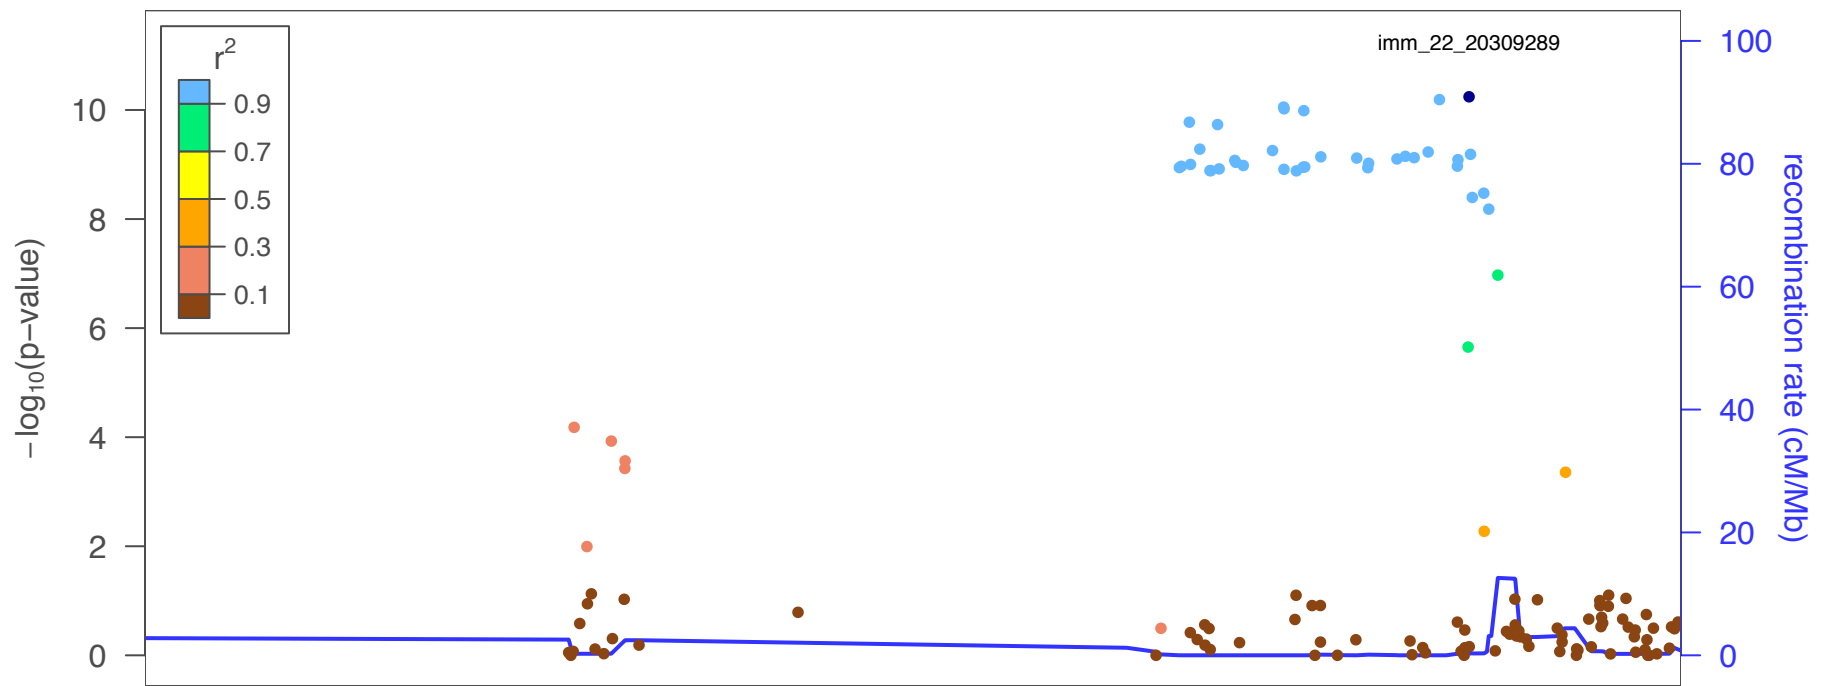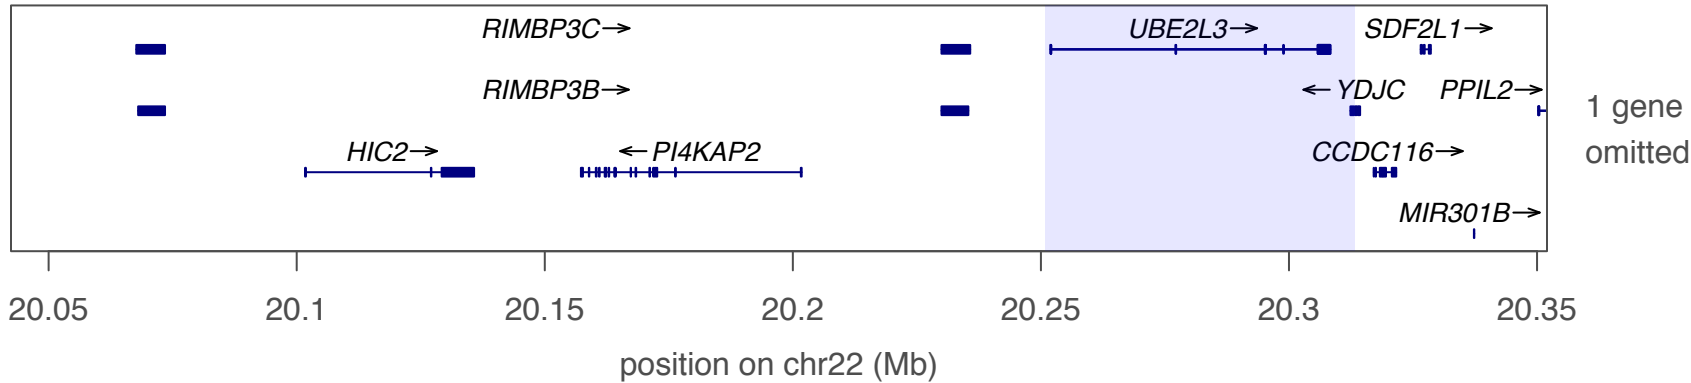



**Supplementary Table 3**

Significance thresholds for multiple logistic regression.

| Chr | Top variant signal | Position (build36/hg18) | SubjectsWithGenotypes | Permutation based per-locus 5% significance threshold, |      | n ALL SNPs (Table 2)         |                              | n INDEPENDENT SNPs (pairwise r <sup>2</sup> <0.05) |  |
|-----|--------------------|-------------------------|-----------------------|--------------------------------------------------------|------|------------------------------|------------------------------|----------------------------------------------------|--|
|     |                    |                         |                       | logistic regression test (P value)                     |      | Bonferroni corrected P value | Bonferroni corrected P value |                                                    |  |
| 1   | imm_1_2529260      | 2529260                 | 24268                 | 0.0004540                                              | 358  | 0.000139665                  | 50                           | 0.001                                              |  |
| 1   | imm_1_25162321     | 25162321                | 24265                 | 0.001154                                               | 125  | 0.0004                       | 23                           | 0.002173913                                        |  |
| 1   | imm_1_170947654    | 170947654               | 24268                 | 0.0003938                                              | 355  | 0.000140845                  | 36                           | 0.001388889                                        |  |
| 1   | imm_1_190808095    | 190808095               | 24260                 | 0.0003215                                              | 181  | 0.000276243                  | 39                           | 0.001282051                                        |  |
| 1   | imm_1_199148015    | 199148015               | 24265                 | 0.0005068                                              | 331  | 0.000151057                  | 40                           | 0.00125                                            |  |
| 2   | imm_2_61040333     | 61040333                | 24269                 | 0.0001910                                              | 1047 | 4.77555E-05                  | 80                           | 0.000625                                           |  |
| 2   | imm_2_68499064     | 68499064                | 24266                 | 0.0005327                                              | 357  | 0.000140056                  | 36                           | 0.001388889                                        |  |
| 2   | imm_2_102453202    | 102453202               | 24268                 | 0.0002867                                              | 894  | 5.59284E-05                  | 72                           | 0.000694444                                        |  |
| 2   | imm_2_181716045    | 181716045               | 24269                 | 0.0003658                                              | 898  | 5.56793E-05                  | 49                           | 0.001020408                                        |  |
| 2   | imm_2_191621279    | 191621279               | 24269                 | 0.0008308                                              | 203  | 0.000246305                  | 32                           | 0.0015625                                          |  |
| 2   | imm_2_204318641    | 204318641               | 24269                 | 0.0003573                                              | 642  | 7.78816E-05                  | 48                           | 0.001041667                                        |  |
| 3   | imm_3_33012725     | 33012725                | 24269                 | 0.0005337                                              | 260  | 0.000192308                  | 26                           | 0.001923077                                        |  |
| 3   | imm_3_46353029     | 46353029                | 24267                 | 0.0001662                                              | 1343 | 3.72301E-05                  | 54                           | 0.000925926                                        |  |
| 3   | imm_3_120605968    | 120605968               | 24262                 | 0.0005499                                              | 372  | 0.000134409                  | 33                           | 0.001515152                                        |  |
| 3   | imm_3_161120372    | 161120372               | 24269                 | 0.0004084                                              | 423  | 0.000118203                  | 62                           | 0.000806452                                        |  |
| 3   | imm_3_189602595    | 189602595               | 24262                 | 0.0009655                                              | 142  | 0.000352113                  | 24                           | 0.002083333                                        |  |
| 4   | imm_4_123770564    | 123770564               | 24269                 | 0.0001466                                              | 1294 | 3.86399E-05                  | 165                          | 0.00030303                                         |  |
| 6   | imm_6_353079       | 353079                  | 24269                 | 0.0006746                                              | 199  | 0.000251256                  | 31                           | 0.001612903                                        |  |
| 6   | imm_6_90866360     | 90866360                | 24269                 | 0.0005366                                              | 341  | 0.000146628                  | 43                           | 0.001162791                                        |  |
| 6   | imm_6_128335255    | 128335255               | 24269                 | 0.0003598                                              | 572  | 8.74126E-05                  | 47                           | 0.00106383                                         |  |
| 6   | imm_6_138047208    | 138047208               | 24268                 | 0.0002504                                              | 864  | 5.78704E-05                  | 59                           | 0.000847458                                        |  |
| 6   | imm_6_159389562    | 159389562               | 24266                 | 0.0004611                                              | 514  | 9.72763E-05                  | 34                           | 0.001470588                                        |  |
| 7   | 1kg_7_37384979     | 37384979                | 24269                 | 0.0007000                                              | 213  | 0.000234742                  | 18                           | 0.002777778                                        |  |
| 8   | imm_8_129333242    | 129333242               | 24267                 | 0.0005021                                              | 400  | 0.000125                     | 35                           | 0.001428571                                        |  |
| 10  | imm_10_6430198     | 6430198                 | 24259                 | 0.0003170                                              | 411  | 0.000121655                  | 84                           | 0.000595238                                        |  |
| 10  | imm_10_80728033    | 80728033                | 24257                 | 0.0006753                                              | 223  | 0.000224215                  | 21                           | 0.002380952                                        |  |
| 11  | rs10892258         | 118085075               | 24263                 | 0.0003924                                              | 466  | 0.000107296                  | 57                           | 0.000877193                                        |  |
| 11  | imm_11_127897147   | 127897147               | 24269                 | 0.0004242                                              | 480  | 0.000104167                  | 56                           | 0.000892857                                        |  |
| 12  | imm_12_110368991   | 110368991               | 24269                 | 0.0003621                                              | 938  | 5.33049E-05                  | 62                           | 0.000806452                                        |  |
| 14  | imm_14_68329255    | 68329255                | 24265                 | 0.0005669                                              | 338  | 0.000147929                  | 29                           | 0.001724138                                        |  |
| 16  | imm_16_11268703    | 11268703                | 24263                 | 0.0004695                                              | 446  | 0.000112108                  | 27                           | 0.001851852                                        |  |
| 18  | imm_18_12833137    | 12833137                | 24269                 | 0.0004279                                              | 411  | 0.000121655                  | 57                           | 0.000877193                                        |  |
| 21  | imm_21_42728136    | 42728136                | 24269                 | 0.0008135                                              | 226  | 0.000221239                  | 21                           | 0.002380952                                        |  |
| 21  | imm_21_44453549    | 44453549                | 24259                 | 0.0004120                                              | 239  | 0.000209205                  | 35                           | 0.001428571                                        |  |
| 22  | imm_22_20309289    | 20309289                | 24266                 | 0.001491                                               | 131  | 0.000381679                  | 26                           | 0.001923077                                        |  |
| 23  | 1kg_X_152901442    | 152901442               | 24266                 | 0.0007816                                              | 88   | 0.000568182                  | 29                           | 0.001724138                                        |  |

total n=24269 subjects

this method was used in the manuscript

Supplementary Table 5

ImmunoChip marker names and dbSNP names.

| <u>Illumina ImmunoChip Manifest Name</u> | <u>dbSNP130 id</u> |
|------------------------------------------|--------------------|
| imm_1_2529260                            | rs4445406          |
| imm_1_25162321                           | rs72657048         |
| imm_1_170947654                          | rs12068671         |
| imm_1_171131275                          | rs859637           |
| imm_1_190808095                          | rs1359062          |
| imm_1_190779182                          | rs72734930         |
| imm_1_199148015                          | rs10800746         |
| imm_2_61040333                           | rs13003464         |
| imm_2_68499064                           | rs10167650         |
| imm_2_102453202                          | rs990171           |
| imm_2_181716045                          | rs1018326          |
| imm_2_191621279                          | rs6715106          |
| imm_2_191681808                          | rs6752770          |
| imm_2_191656882                          | rs12998748         |
| imm_2_204318641                          | rs1980422          |
| imm_2_204478299                          | rs34037980         |
| imm_2_204168206                          | rs10207814         |
| imm_3_33012725                           | rs4678523          |
| imm_3_46353029                           | rs2097282          |
| imm_3_46180690                           | rs7616215          |
| imm_3_46459287                           | rs60215663         |
| imm_3_120605968                          | rs61579022         |
| imm_3_161120372                          | none               |
| imm_3_161106253                          | rs1353248          |
| imm_3_161157622                          | rs2561288          |
| imm_3_189602595                          | rs2030519          |
| imm_4_123770564                          | rs13132308         |
| imm_4_123257745                          | rs62323881         |
| imm_6_353079                             | rs1050976          |
| imm_6_341321                             | rs12203592         |
| imm_6_90866360                           | rs7753008          |
| imm_6_128335255                          | rs55743914         |
| imm_6_128335748                          | rs72975916         |
| imm_6_138047208                          | rs17264332         |
| imm_6_138043754                          | none               |
| imm_6_159389562                          | rs182429           |
| imm_6_159418255                          | rs1107943          |
| 1kg_7_37384979                           | none               |
| imm_8_129333242                          | rs10808568         |
| imm_10_6430198                           | rs2387397          |
| imm_10_80728033                          | rs1250552          |
| rs7104791                                | rs7104791          |
| rs10892258                               | rs10892258         |
| imm_11_127897147                         | rs61907765         |
| imm_12_110368991                         | rs3184504          |
| imm_14_68329255                          | rs11851414         |
| rs1378938                                | rs1378938          |
| rs6498114                                | rs6498114          |
| imm_16_11268703                          | rs243323           |
| imm_16_11281298                          | none               |
| imm_16_11292457                          | rs9673543          |
| imm_18_12833137                          | rs11875687         |
| ccc-18-12847758-G-A                      | rs62097857         |
| imm_21_42728136                          | rs1893592          |
| imm_21_44453549                          | rs58911644         |
| imm_22_20309289                          | rs4821124          |
| 1kg_X_152901442                          | rs13397            |

(note, where chr\_position is given in the Name, these are build36/hg18 coordinates)
